# Supplementary material for: Innovation of 6-sulfonamide-2H-chromene derivatives as antidiabetic agents targeting α-amylase, α-glycosidase, and PPAR-γ inhibitors with in silico molecular docking simulation
Source: Royal Society of Chemistry journal article supplement (doi:10.1039/d4ra02143f), 2024-01-01
Supplement: d4ra02143f1.pdf [file d4ra02143f1.pdf]

**Innovation of 6-sulfonamide-2*H*-chromene as antidiabetic agents targeting  $\alpha$ -amylase,  $\alpha$ -glycosidase, and PPAR- $\gamma$  inhibitors with *in-silico* molecular docking simulation**

Hamdy Khamees Thabet<sup>1,\*</sup>, Ahmed Ragab<sup>2,\*</sup>, Mohd Imran<sup>3</sup>, Mohamed Hamdy Helal<sup>1</sup>, Saleh Ibrahim Alaqel<sup>3</sup>, Ahmed Alshehri<sup>4,5</sup>, Abida Ash Mohd<sup>3</sup>, Saleh Saad Alshammari<sup>1</sup>, Yousry A. Ammar<sup>2</sup>, Moustafa S. Abusaif<sup>2</sup>

<sup>1</sup> Department of Chemistry, College of Sciences and Arts, Northern Border University, Rafha, 91911, Saudi Arabia.

<sup>2</sup> Department of Chemistry, Faculty of Science (Boys), Al-Azhar University, Nasr City, 11884, Cairo, Egypt.

<sup>3</sup> Department of Pharmaceutical Chemistry, College of Pharmacy, Northern Border University, Rafha 91911, Saudi Arabia.

<sup>4</sup> Department of Pharmacology and Toxicology, College of Pharmacy, Northern Border University, Rafha 91911, Saudi Arabia.

<sup>5</sup> Department of Pharmacology, College of Clinical Pharmacy, Imam Abdulrahman Bin Faisal University, King Faisal Road, Dammam 31441, Saudi Arabia

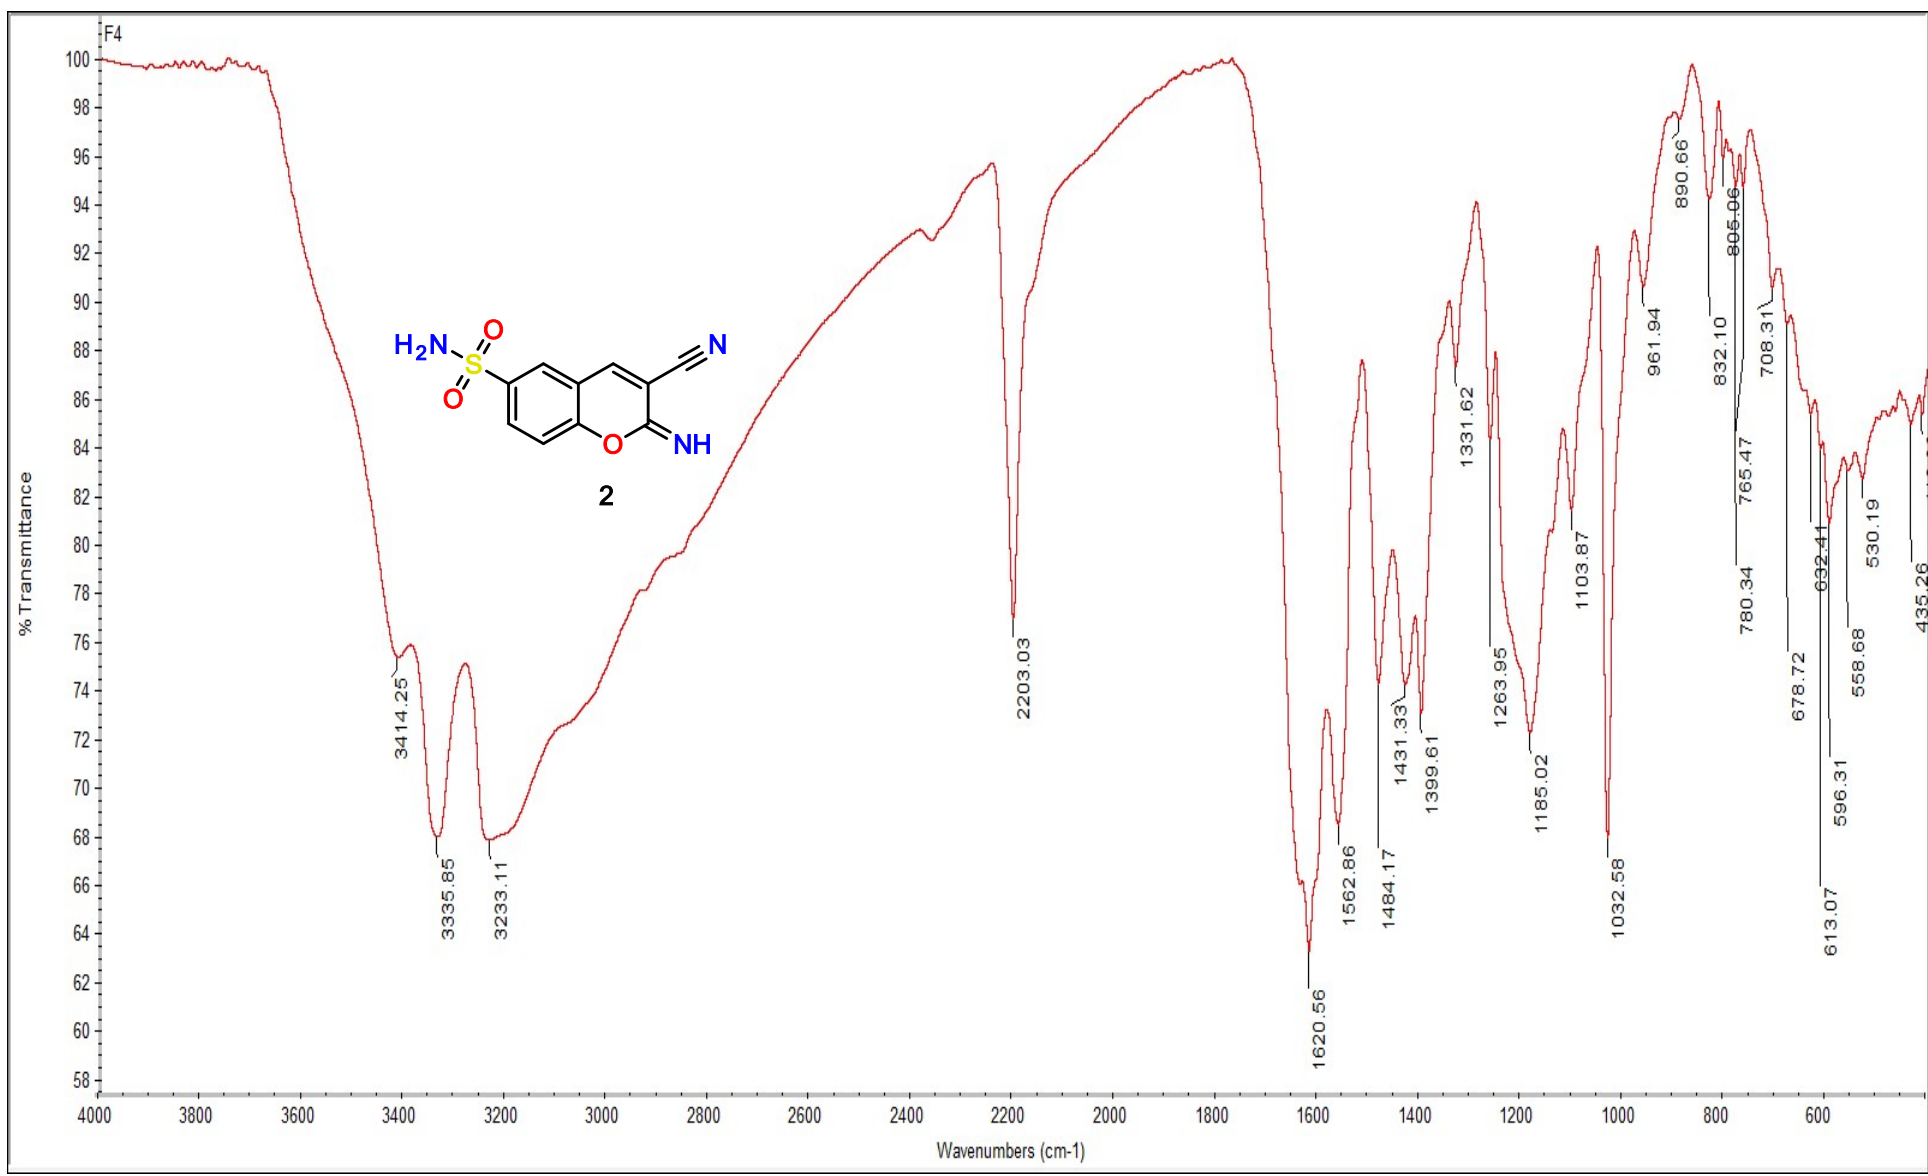

H NMR 2

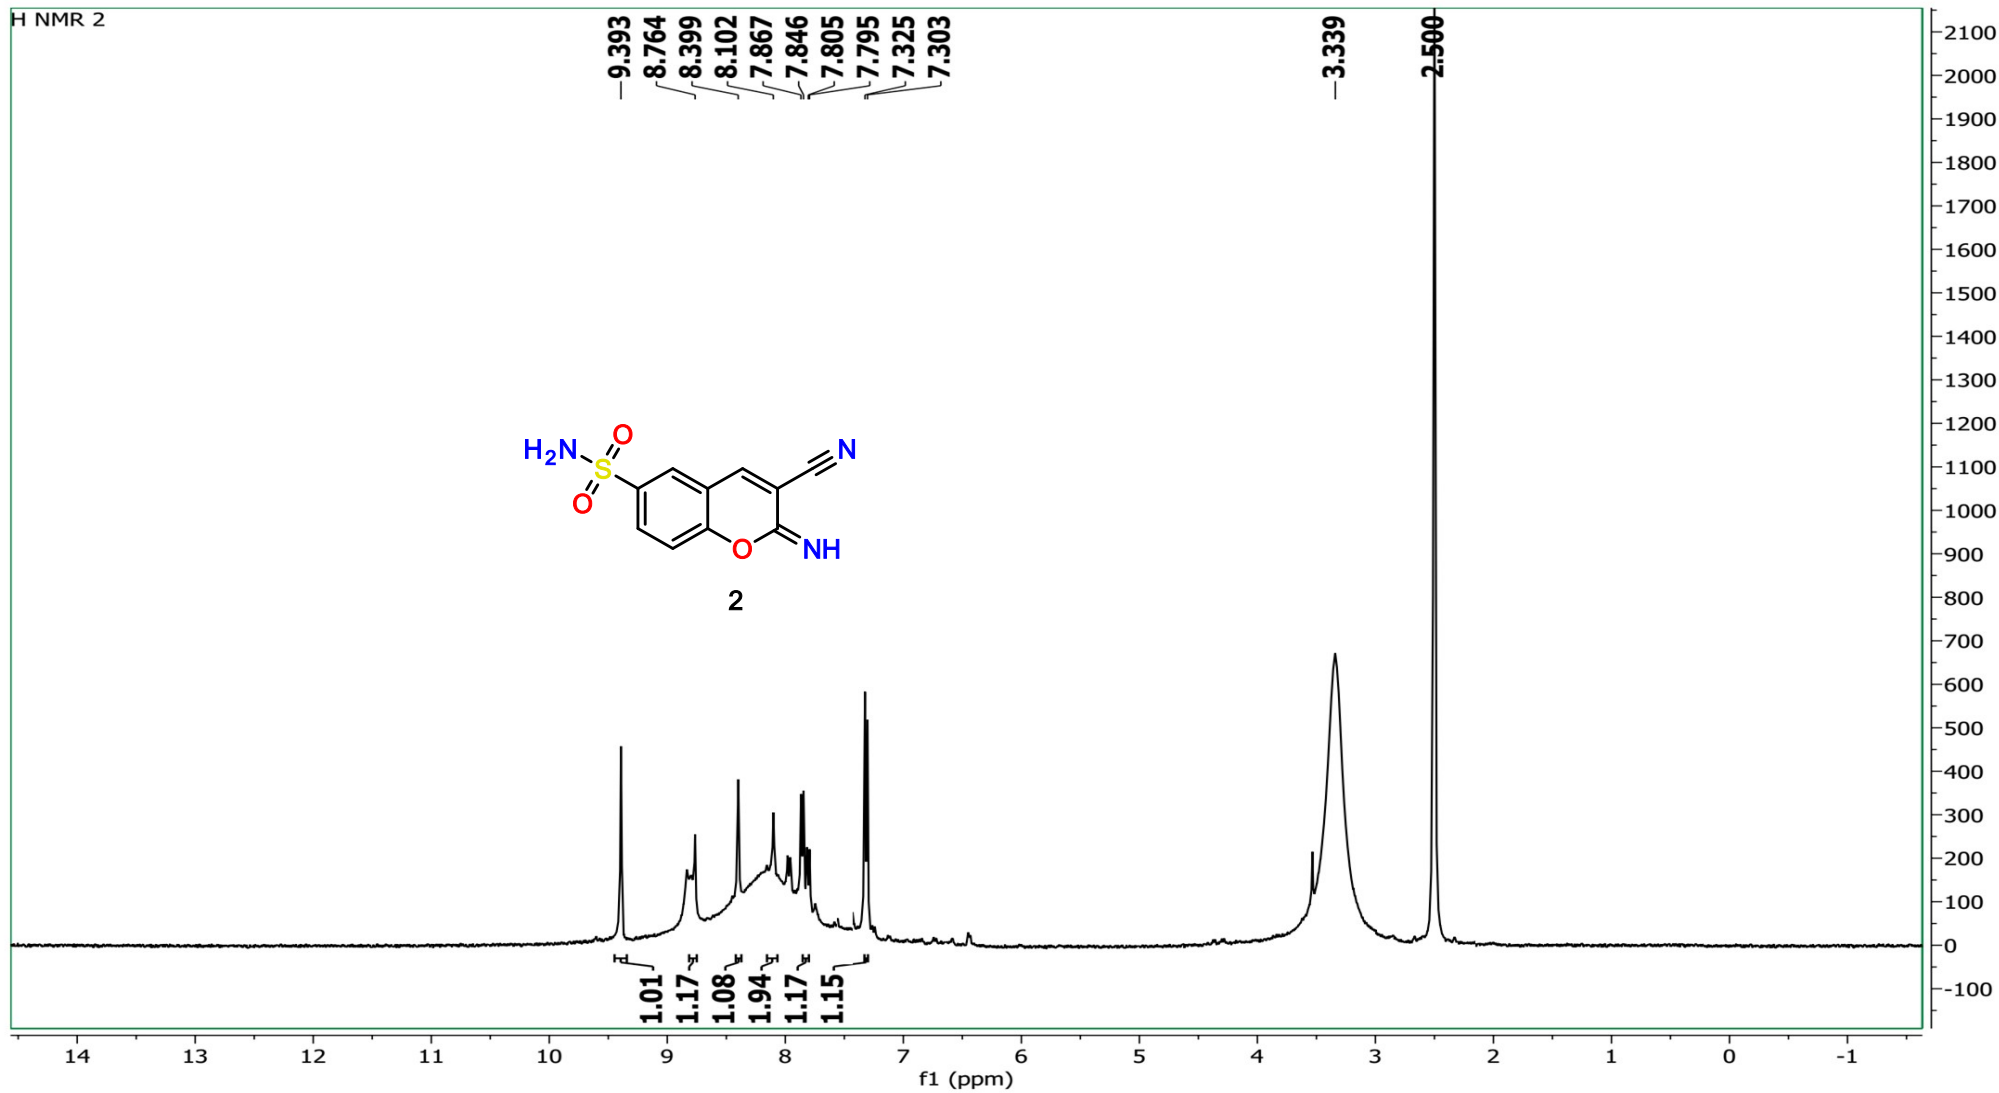

C NMR 2

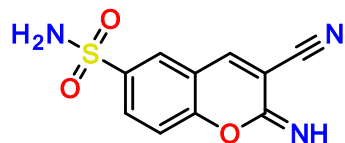

2

160.53  
157.90  
138.12  
131.91  
127.71  
122.61  
118.25  
116.21  
111.45  
96.01

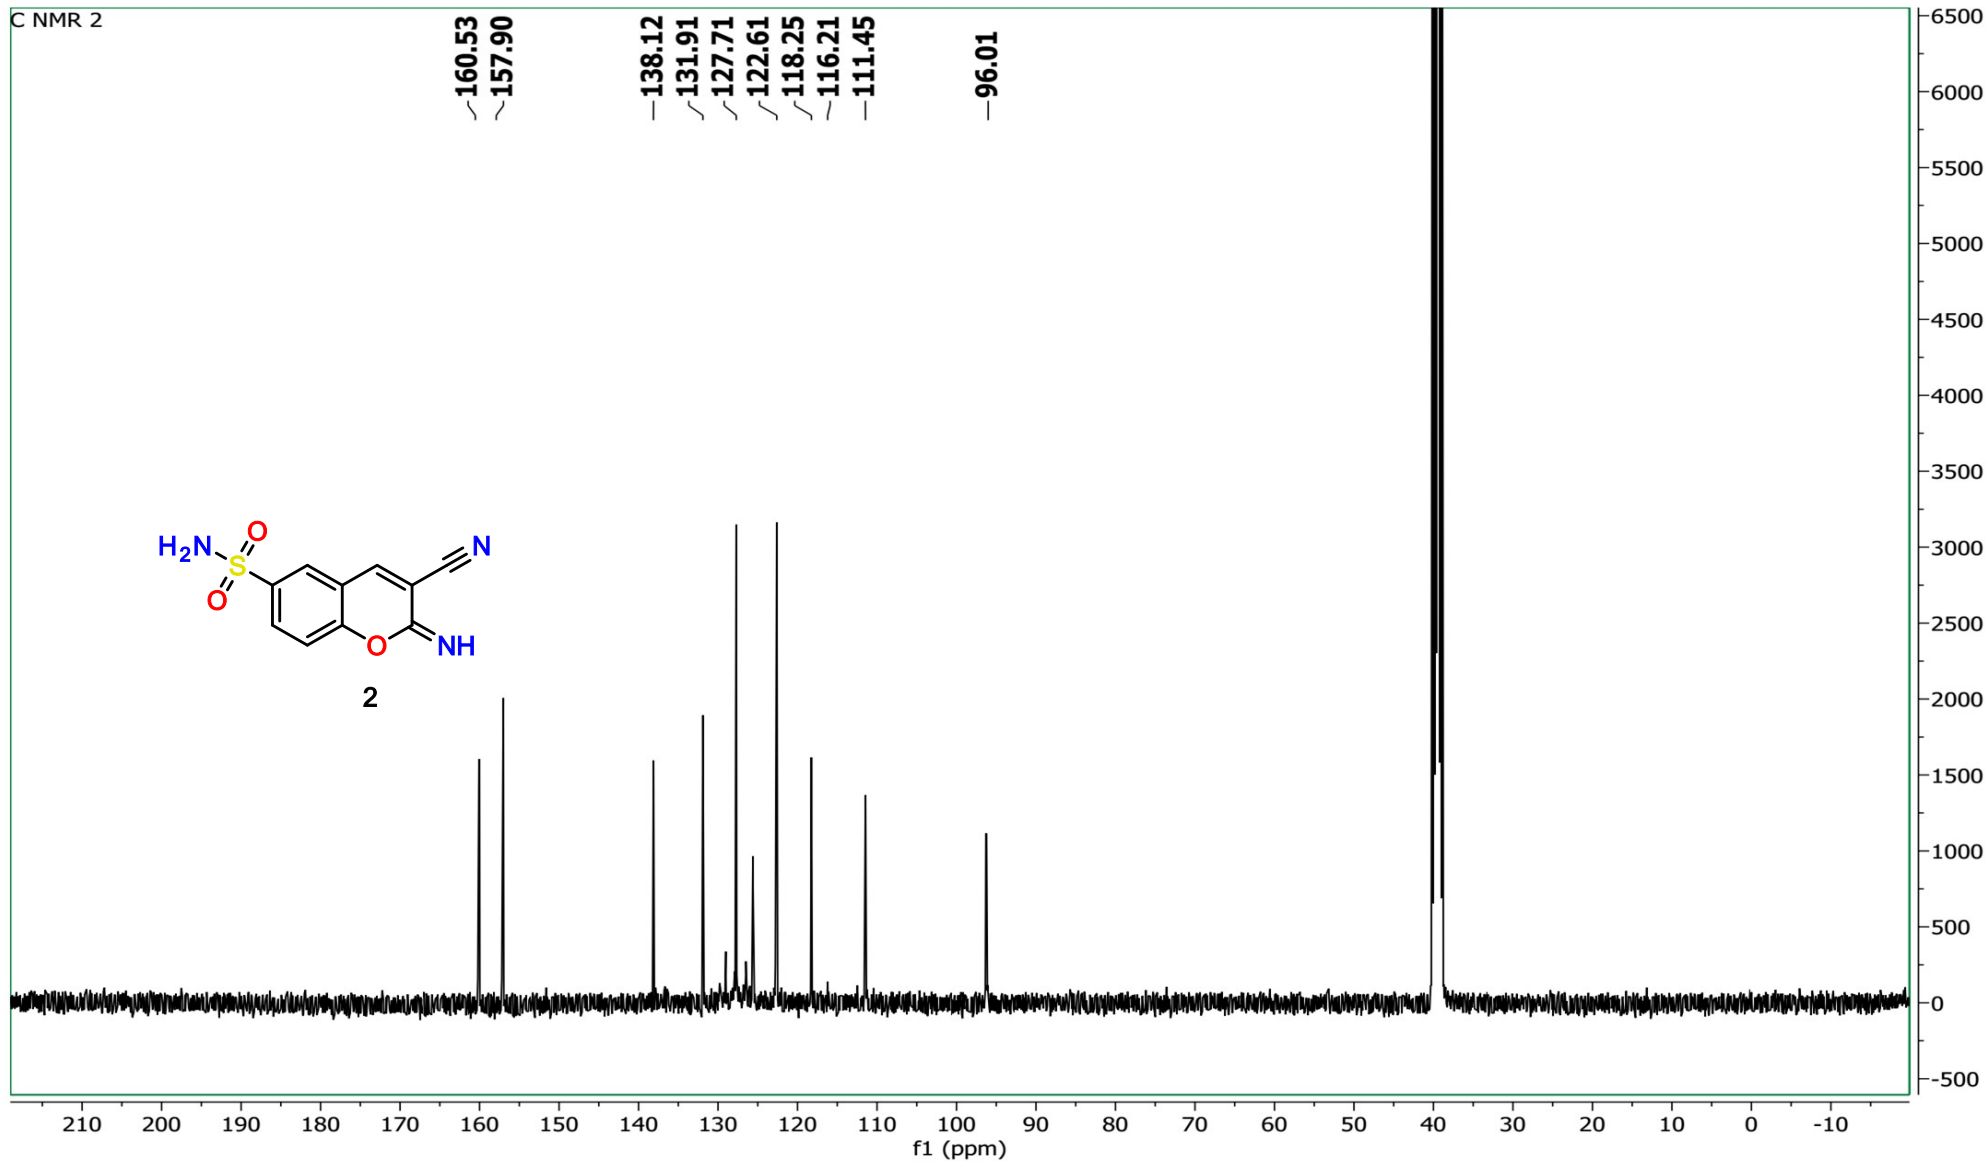

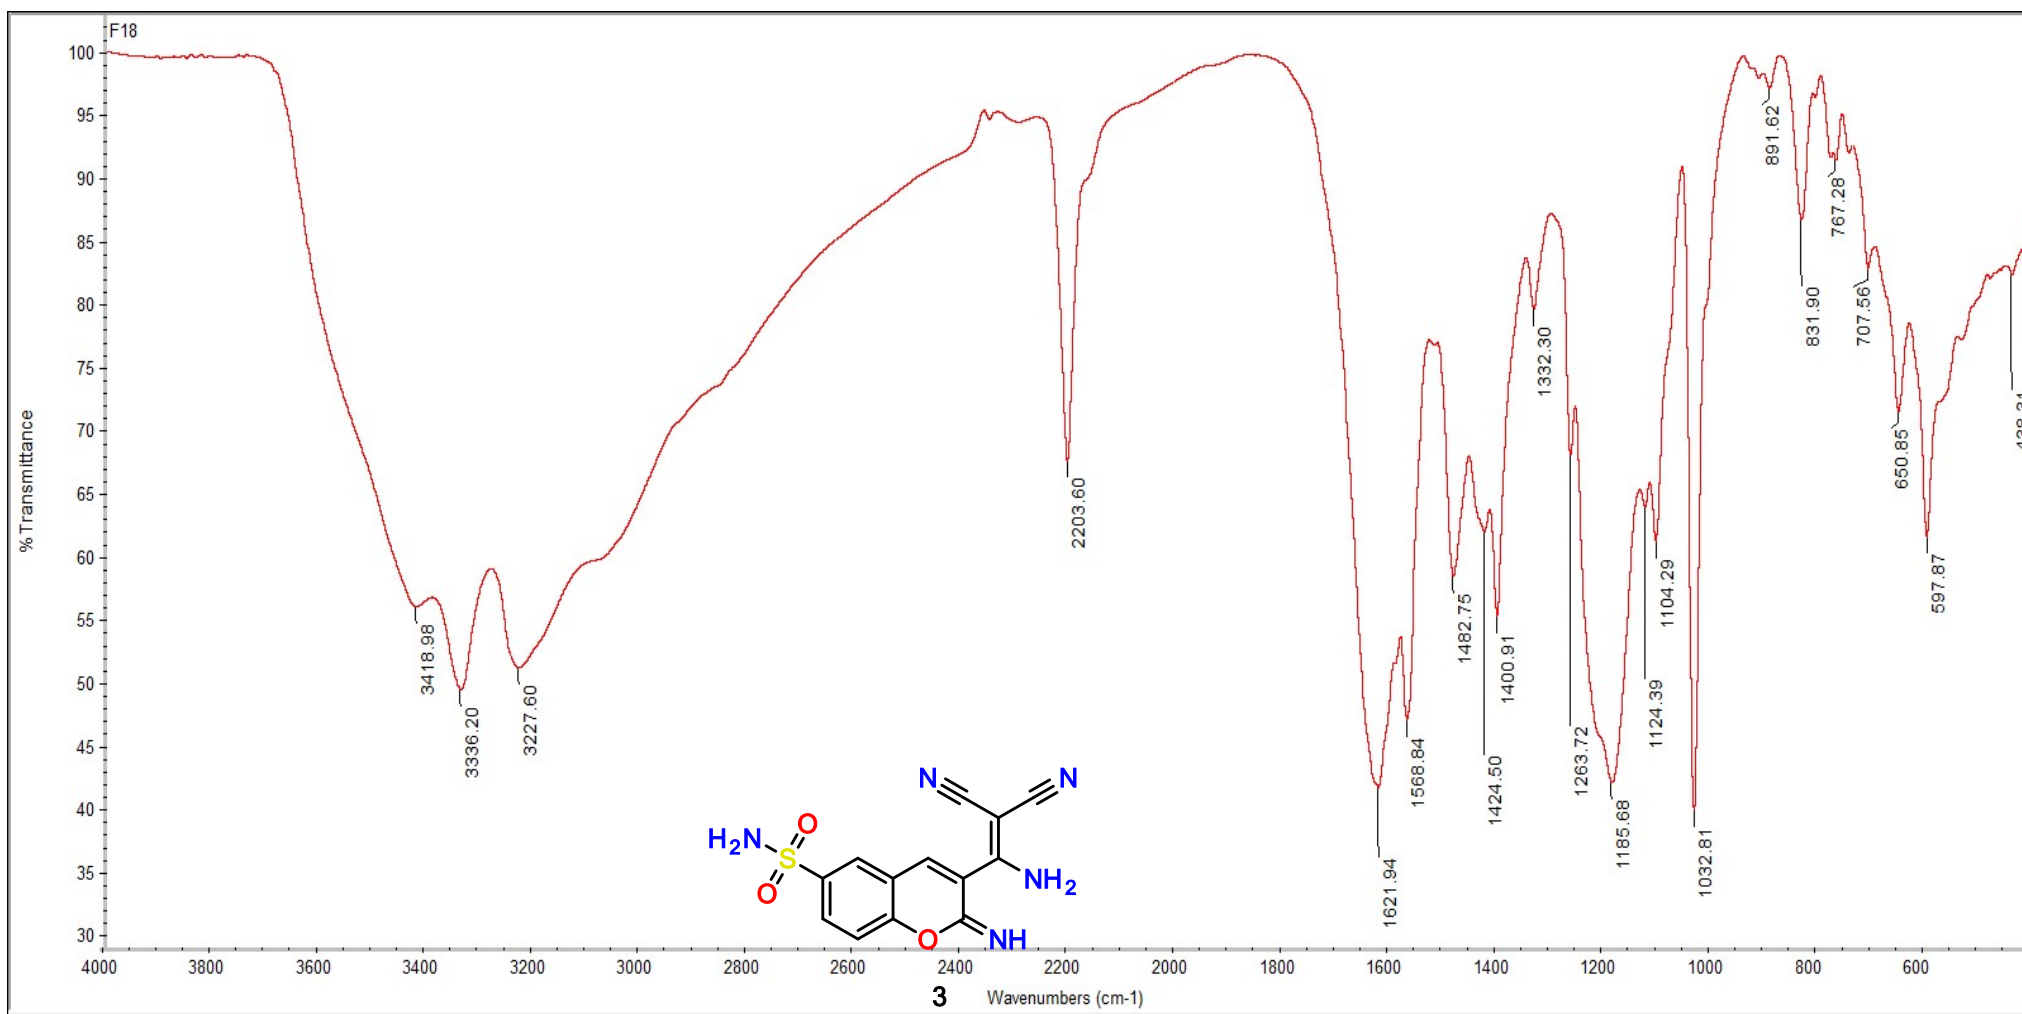

H NMR 3

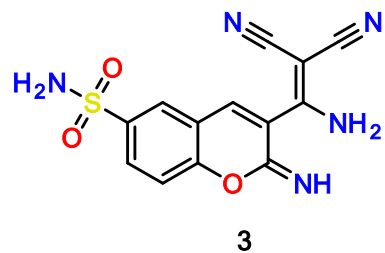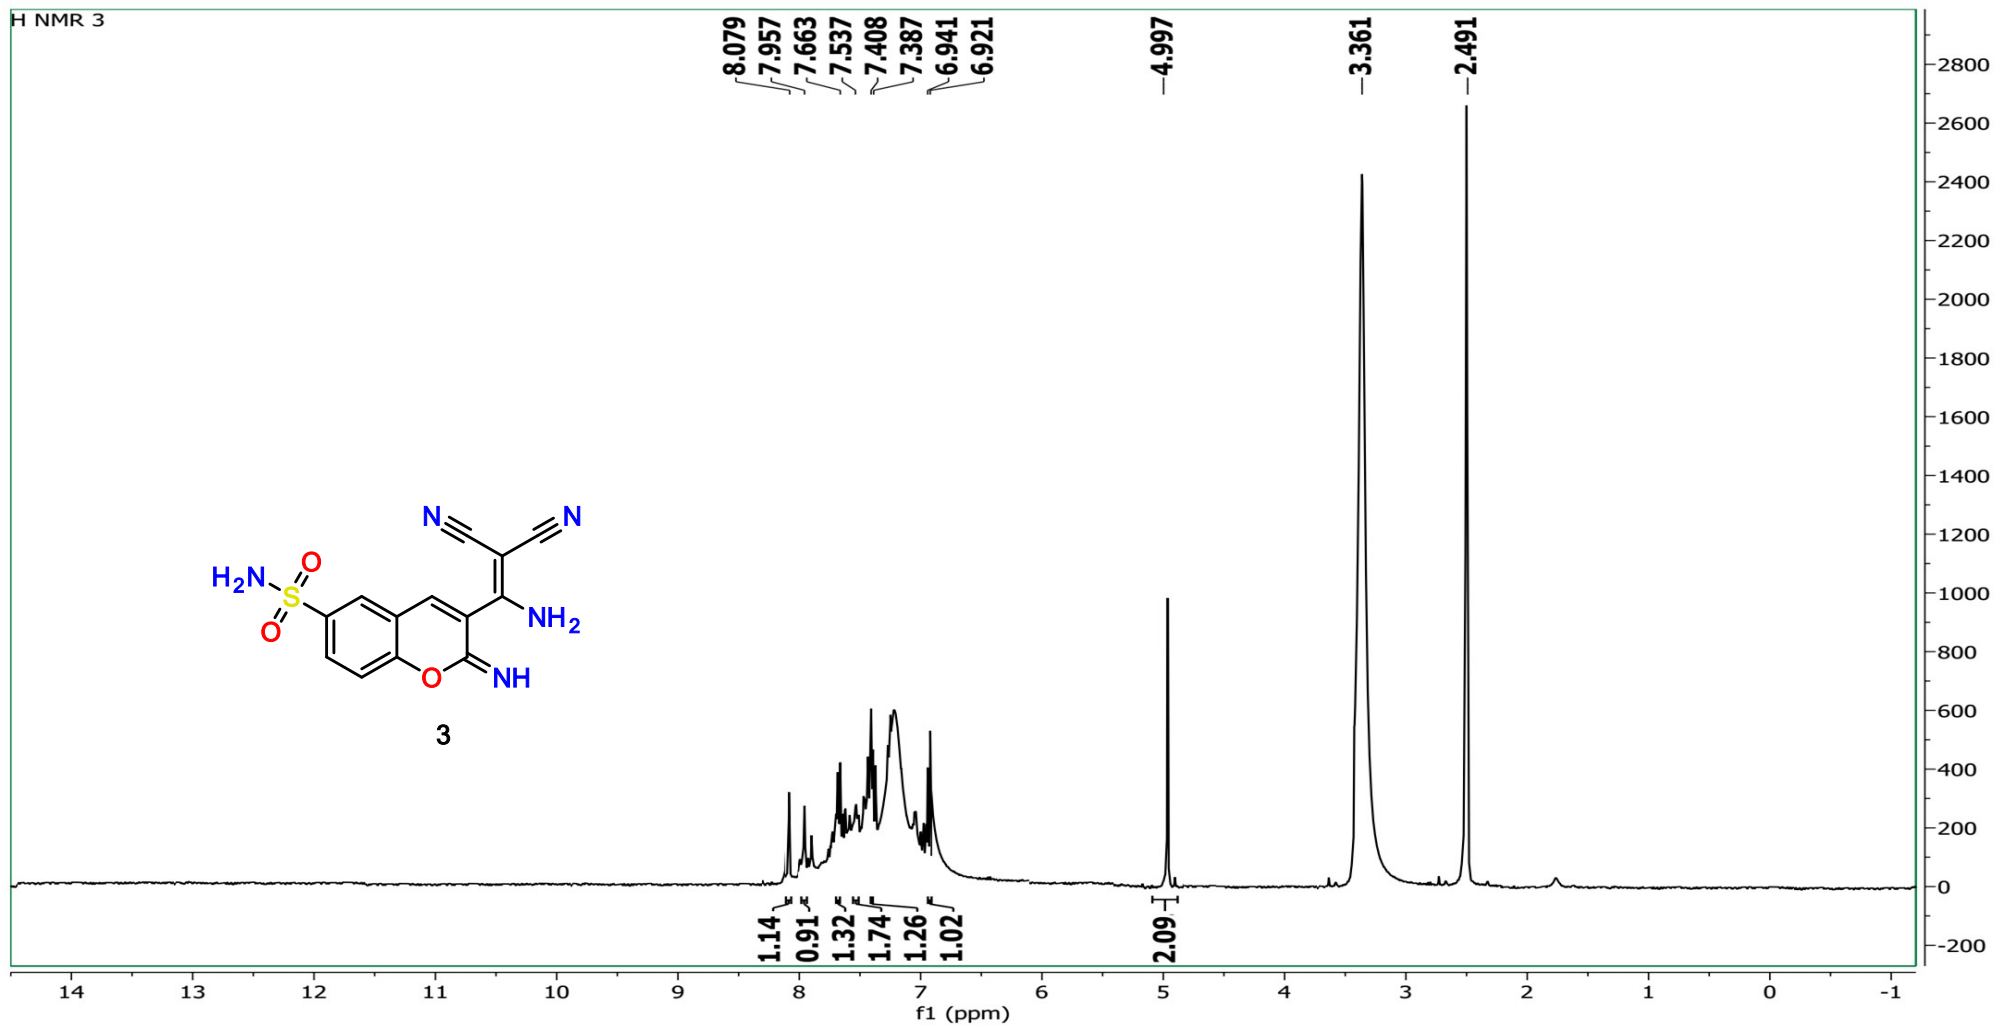

C NMR (3)

178.95

160.08

156.69

140.05

138.12

136.68

131.91

127.71

122.61

118.25

113.48

52.65

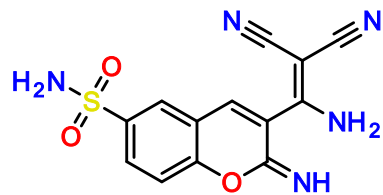

3

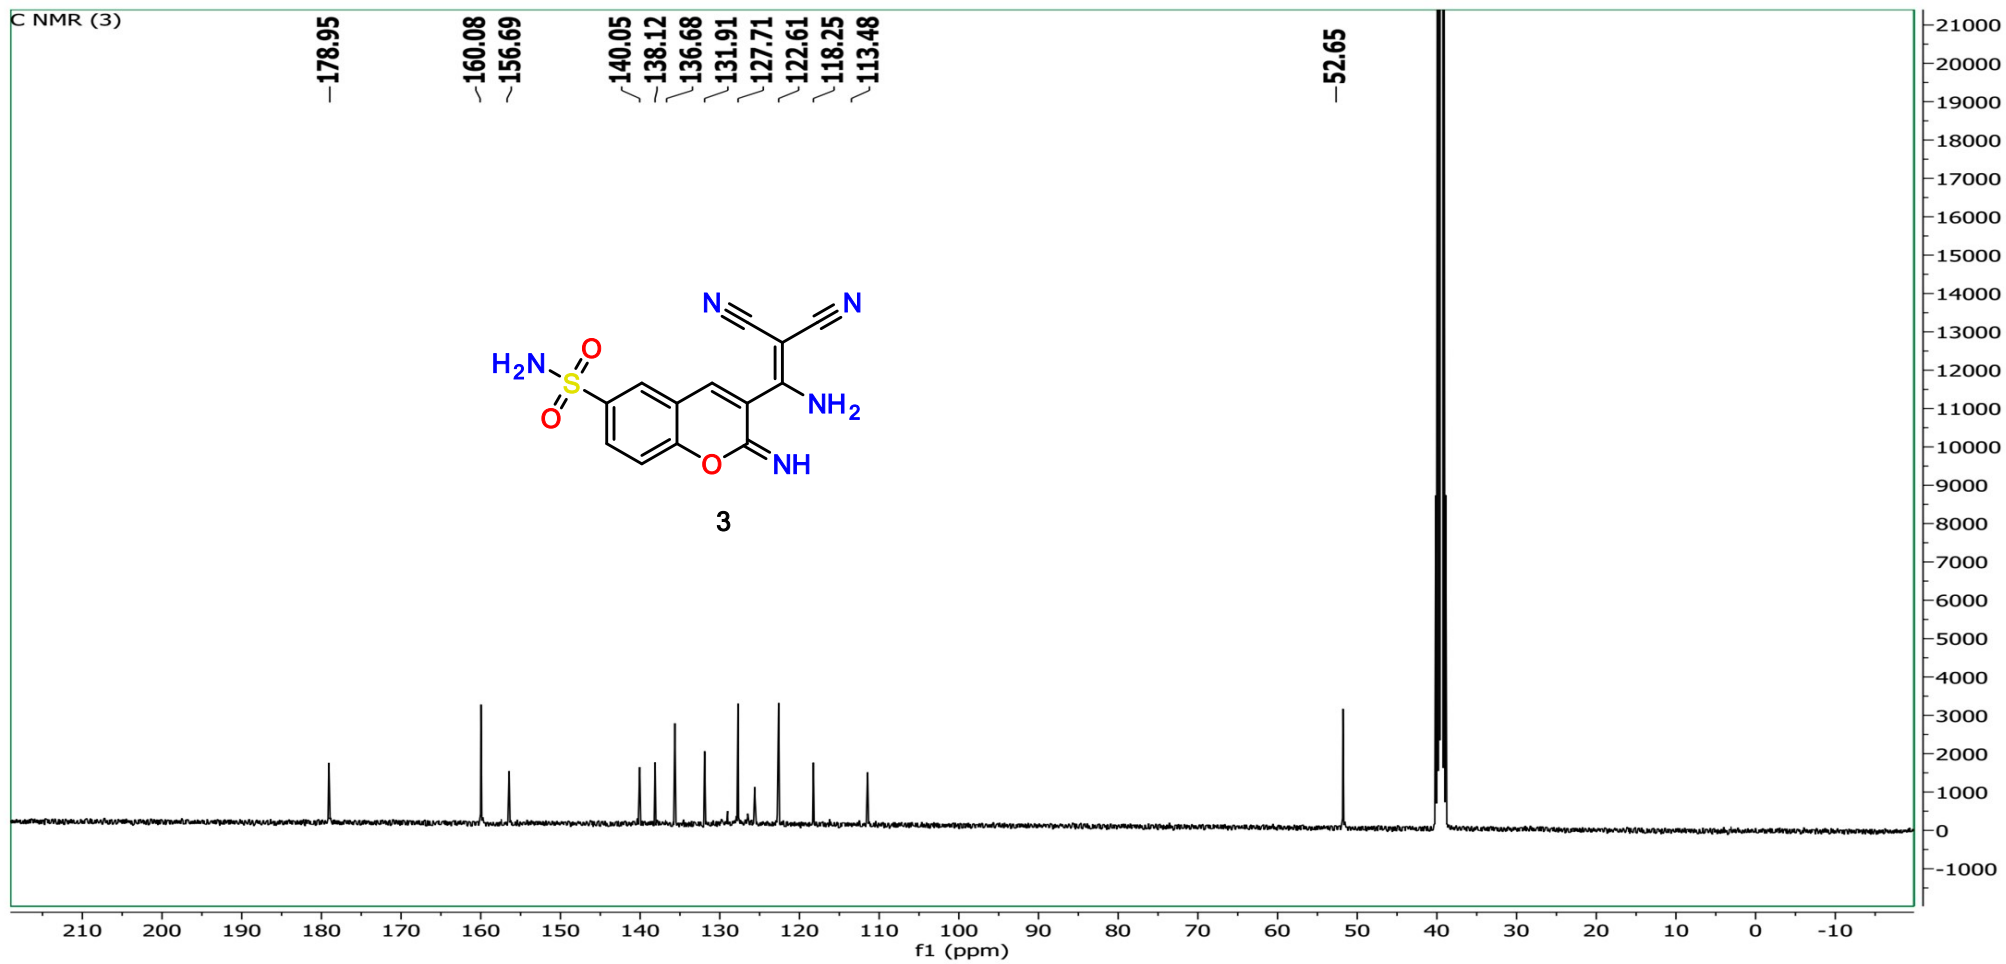

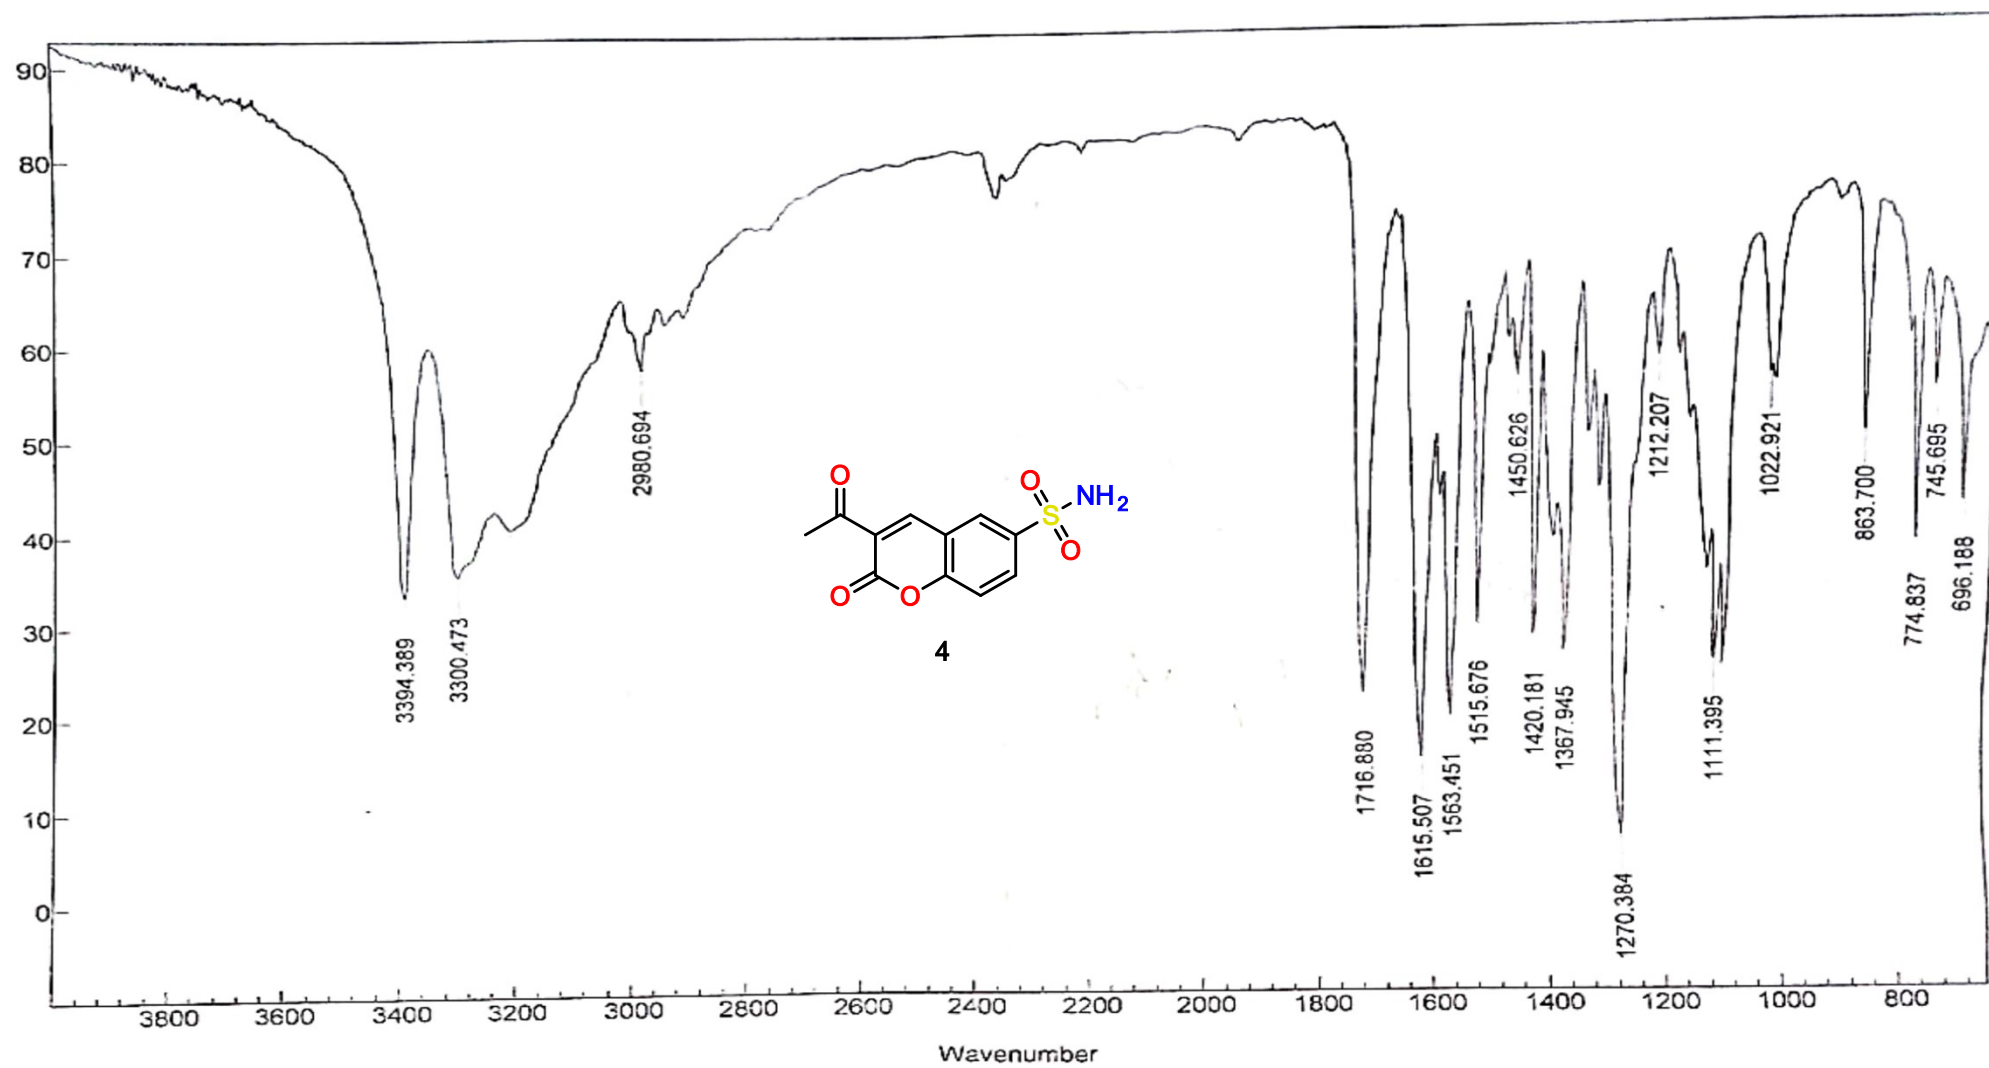



H NMR 4

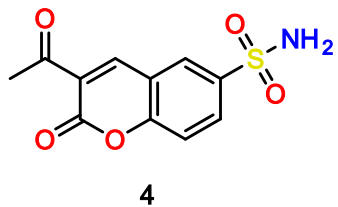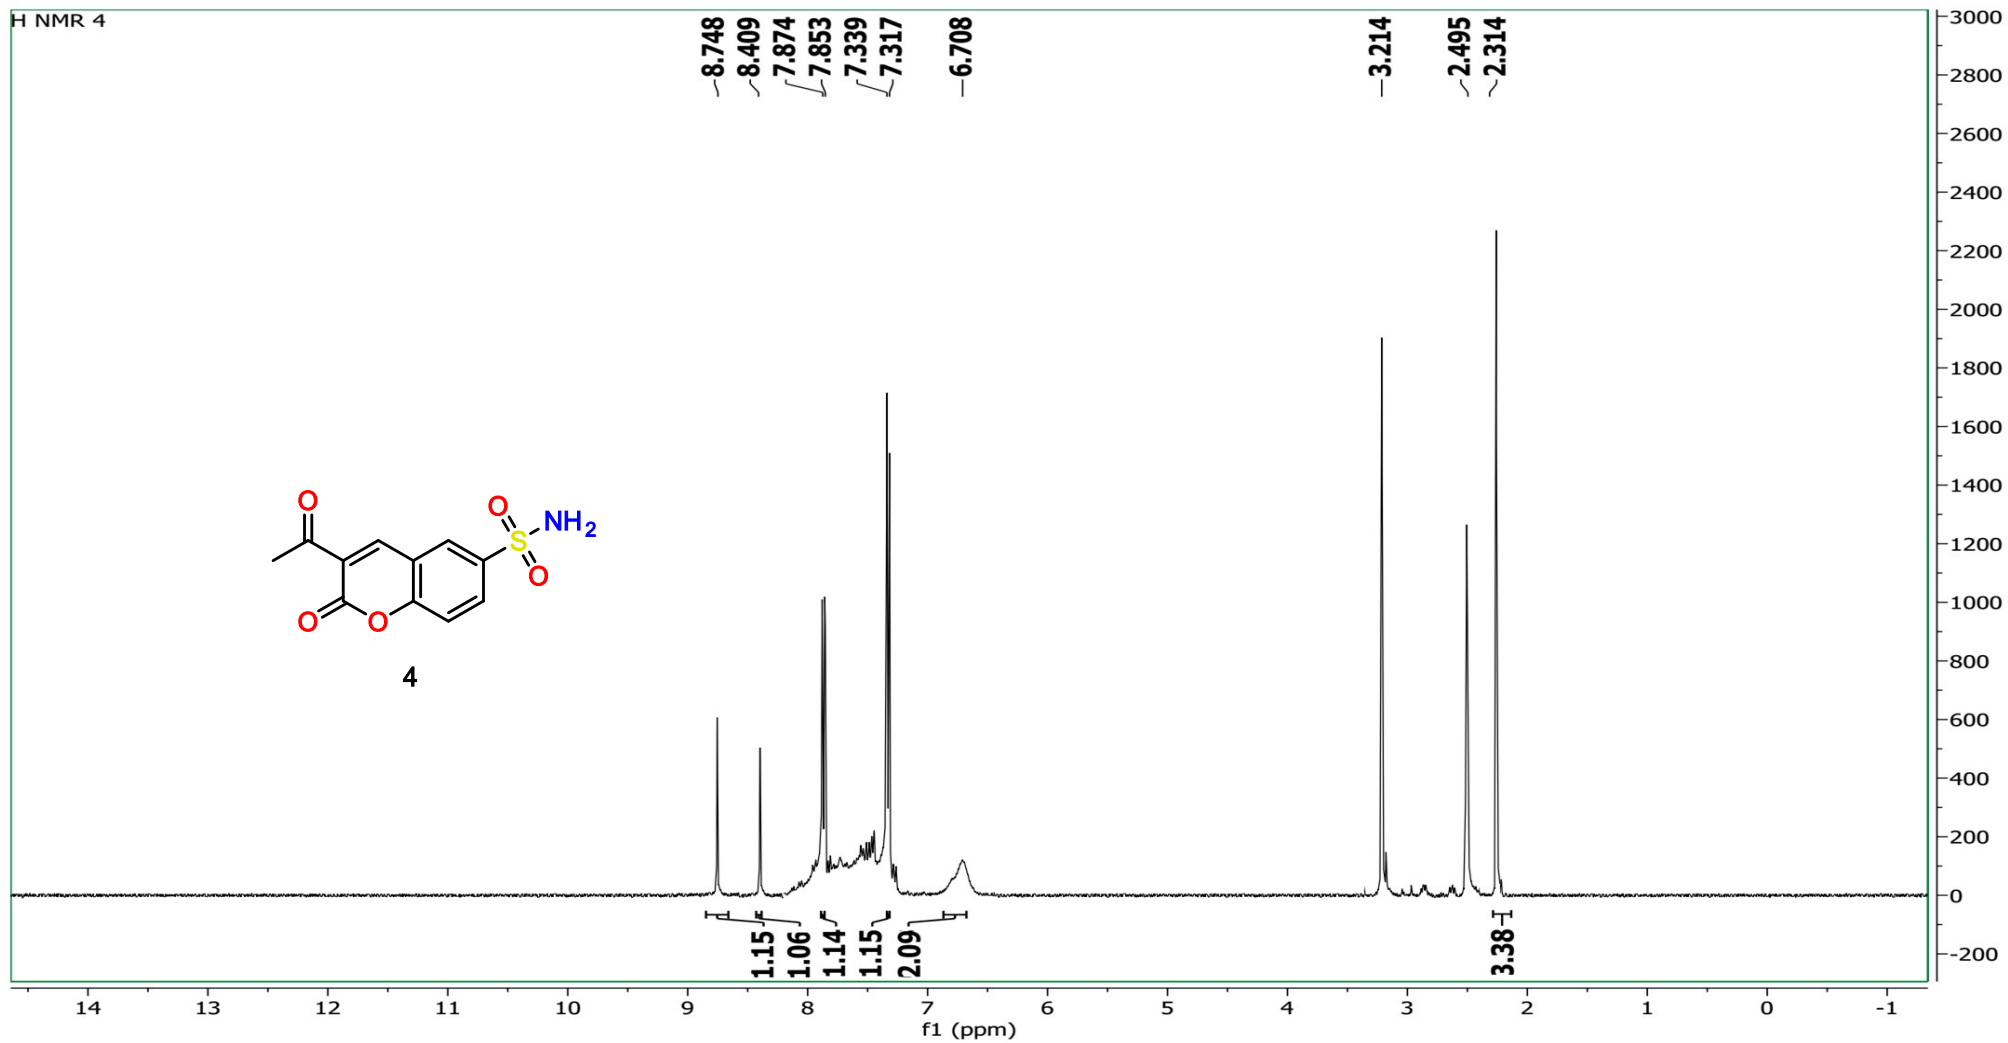

C NMR 4

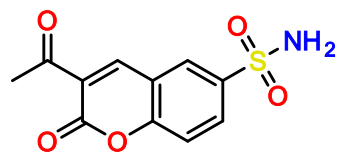

4

183.43

161.15

157.46

144.90

138.55

131.65

127.30

122.06

119.91

119.54

25.90

210 200 190 180 170 160 150 140 130 120 110 100 90 80 70 60 50 40 30 20 10 0 -10

f1 (ppm)

17000  
16000  
15000  
14000  
13000  
12000  
11000  
10000  
9000  
8000  
7000  
6000  
5000  
4000  
3000  
2000  
1000  
0  
-1000

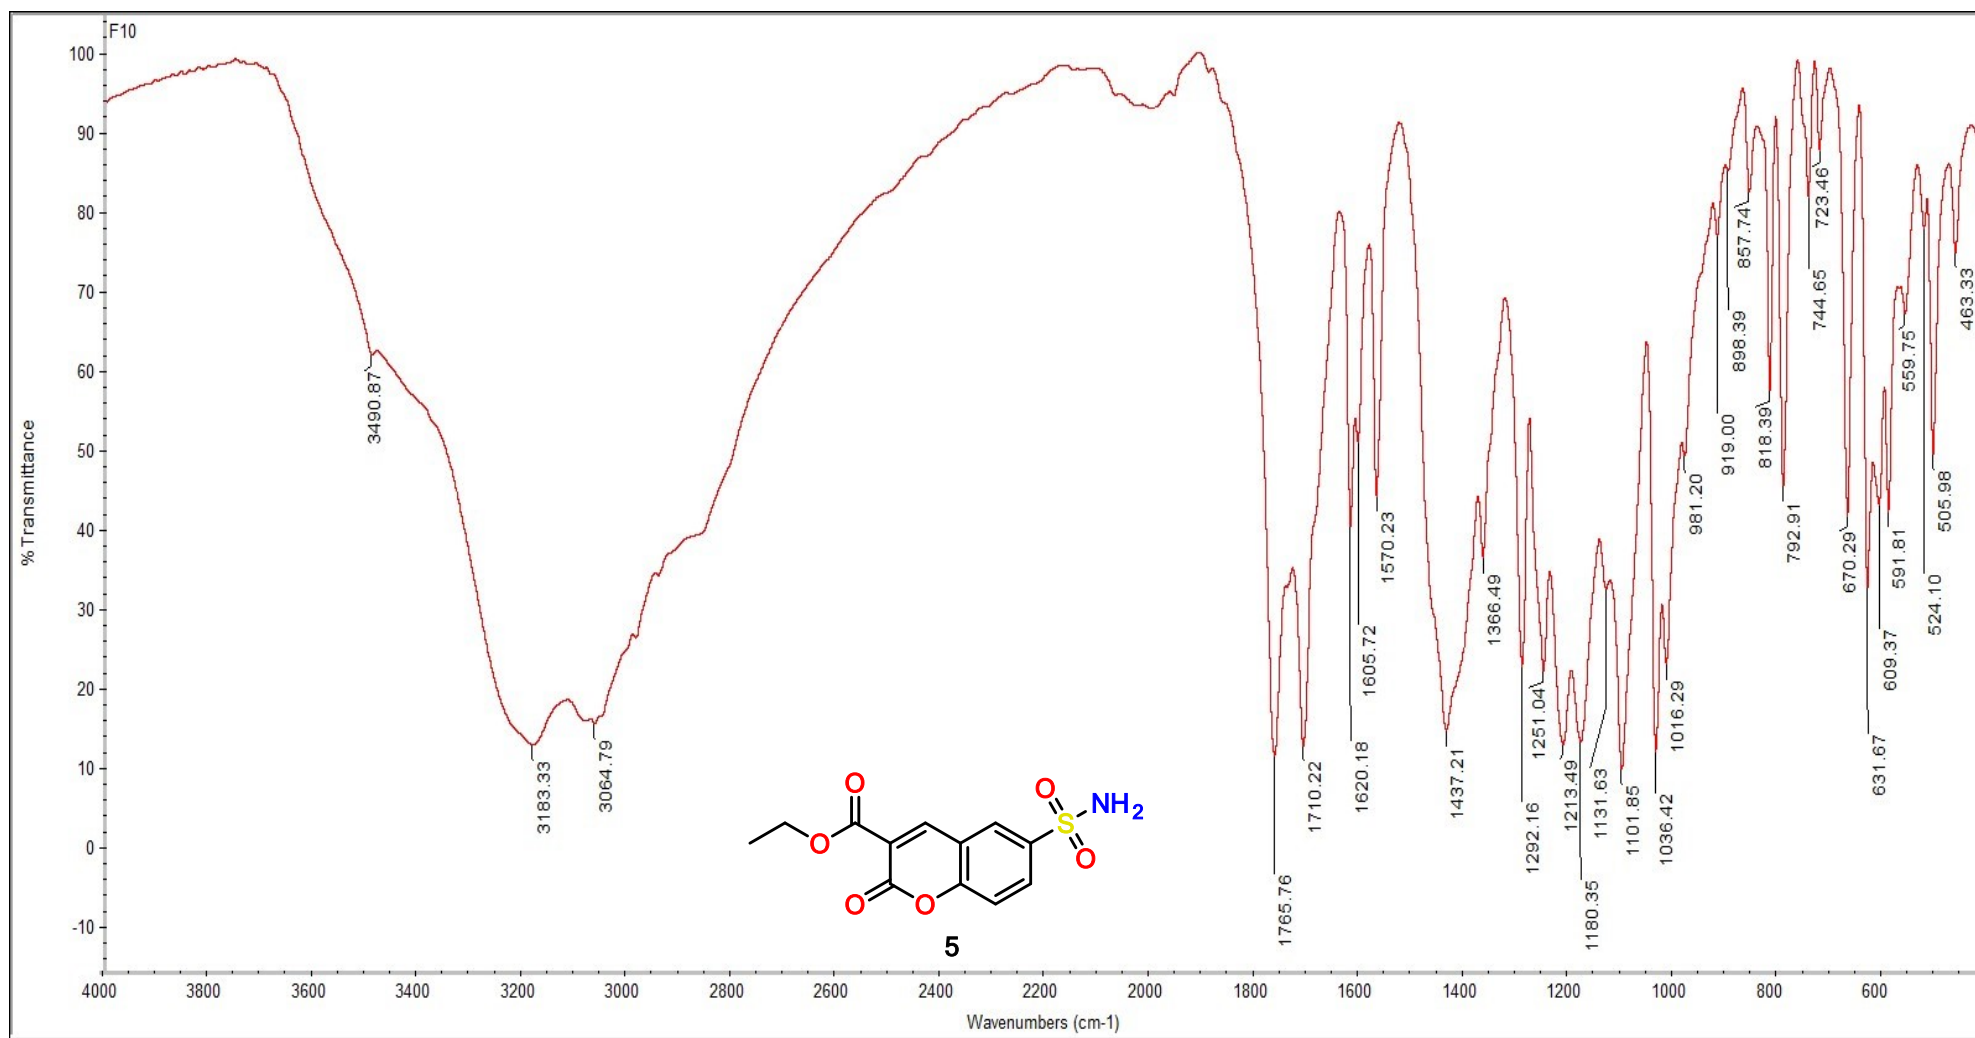

HNMR 5

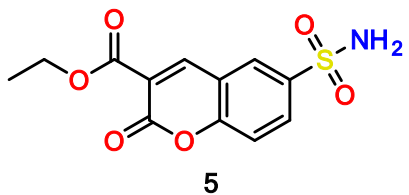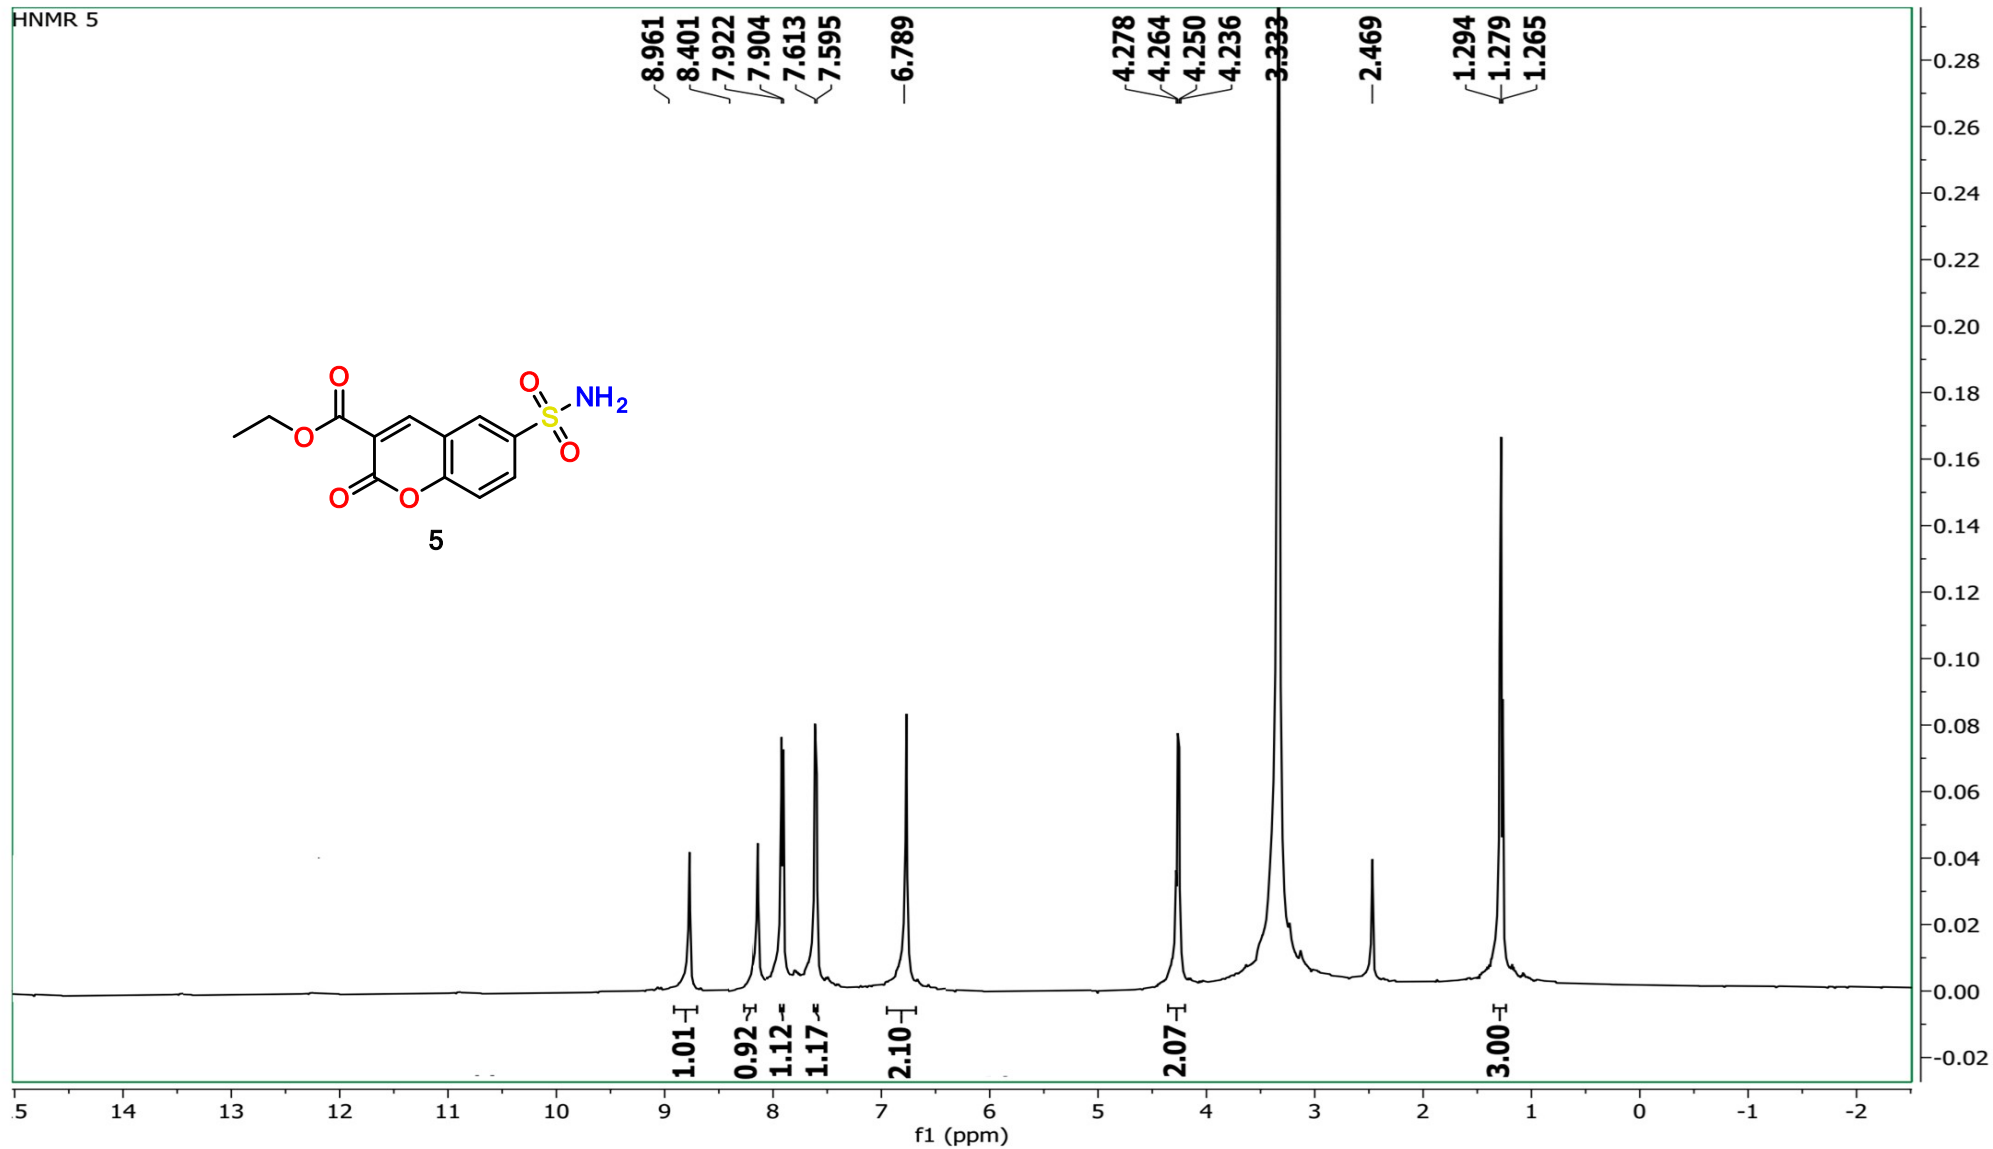

C NMR 5

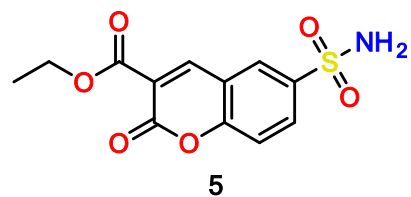

168.14  
161.62  
156.58  
140.33  
138.12  
131.91  
127.71  
125.61  
122.61  
118.26

60.58

13.99

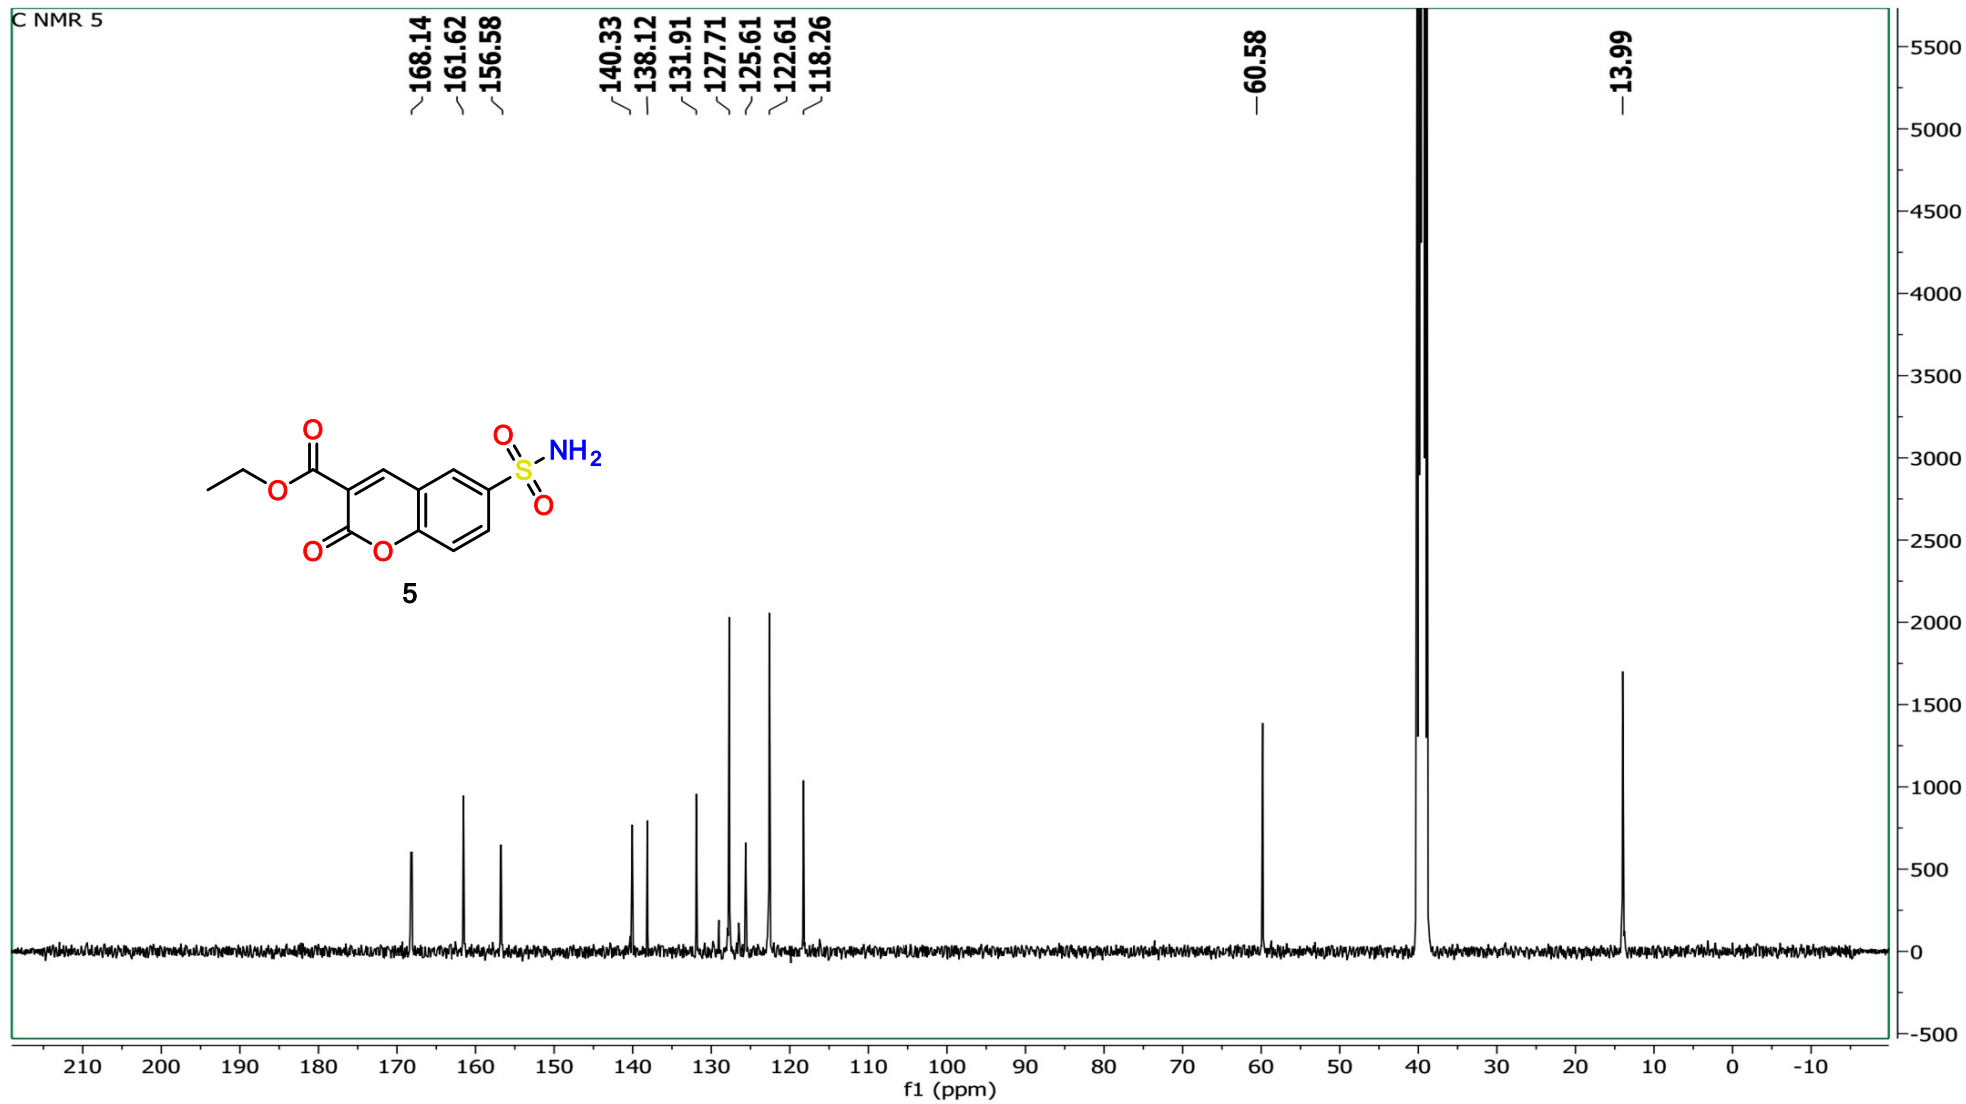

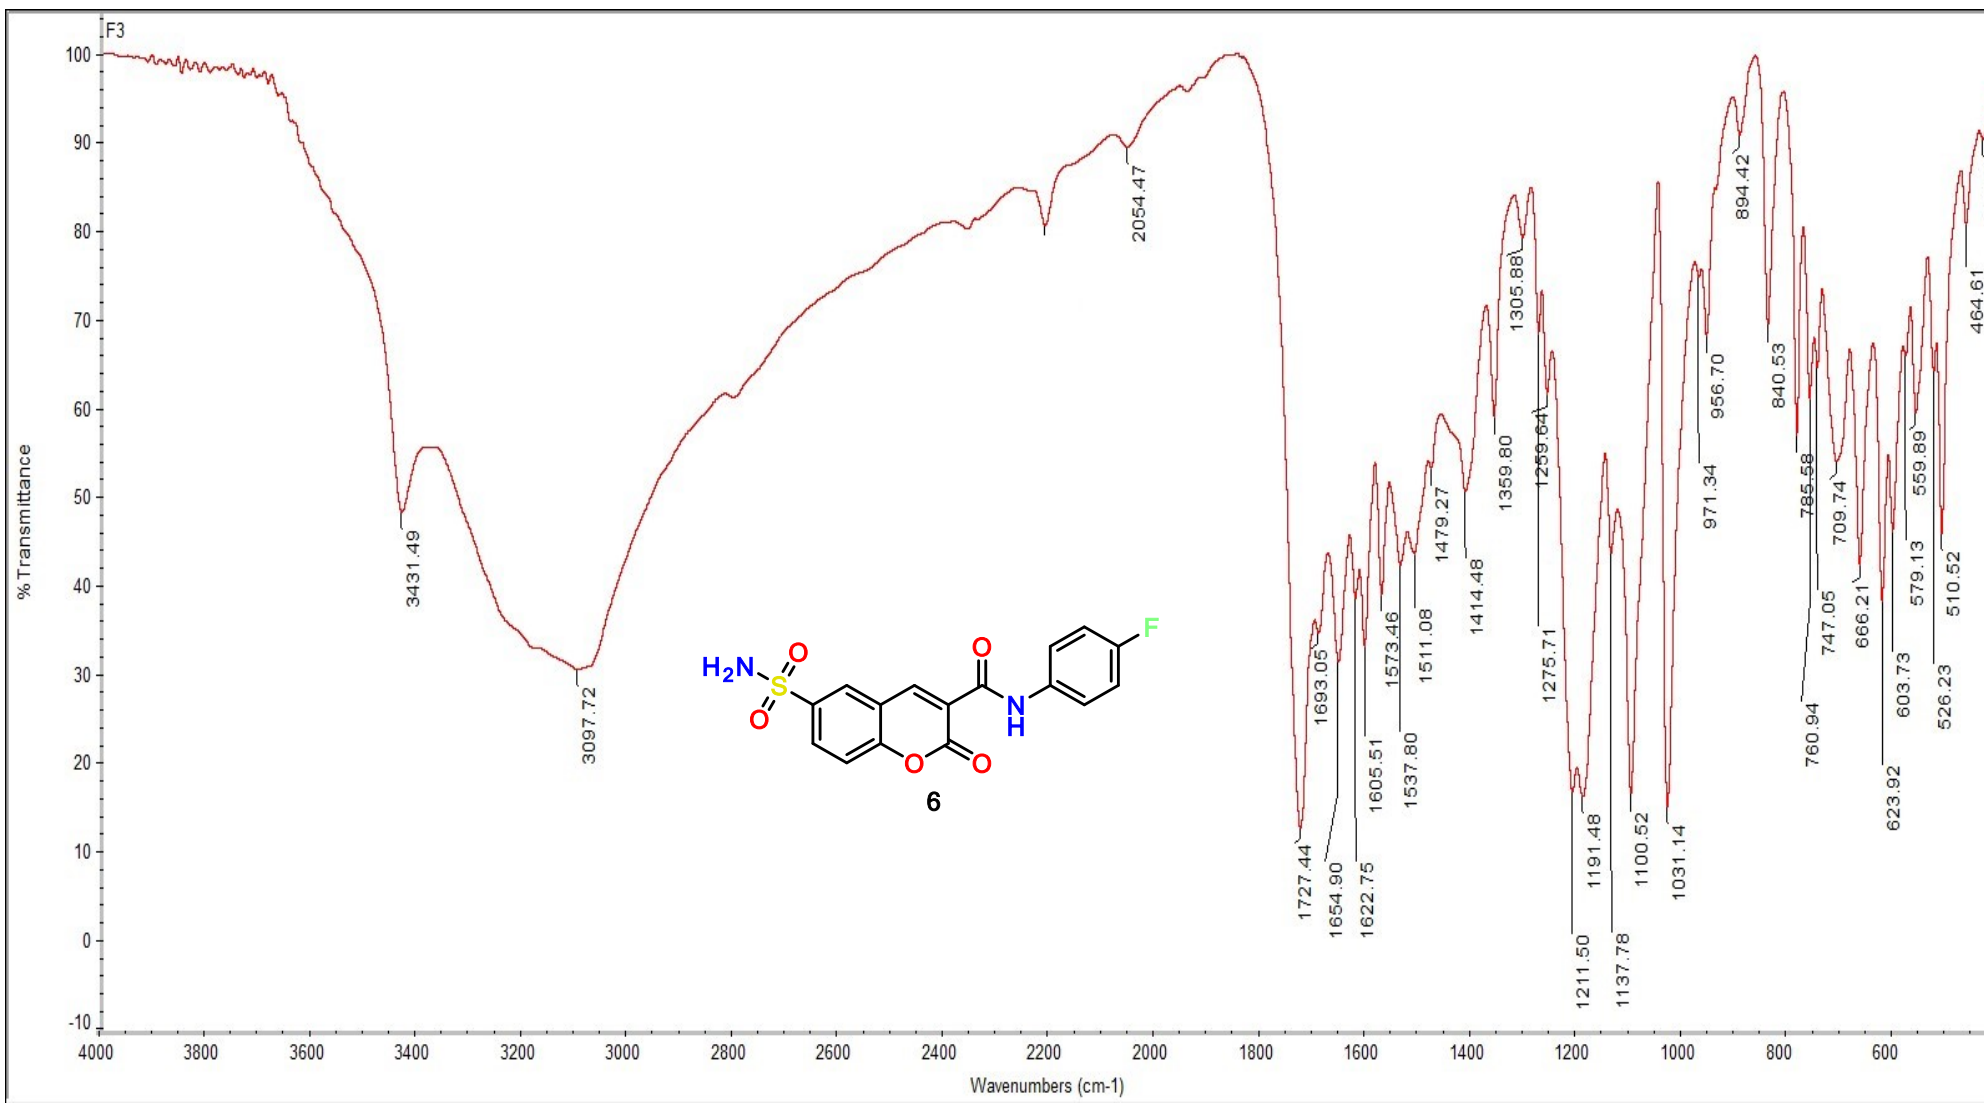

H NMR 6

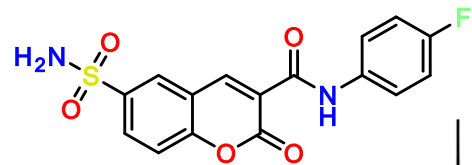

10.466  
8.433  
8.341  
7.843  
7.766  
7.745  
7.724  
7.702  
7.696  
7.673  
7.211  
7.190  
6.901

3.333

2.500

6

0.85

0.90

0.99

0.90

2.29

1.18

2.24

1.98

14 13 12 11 10 9 8 7 6 5 4 3 2 1 0 -1

f1 (ppm)

13000  
12000  
11000  
10000  
9000  
8000  
7000  
6000  
5000  
4000  
3000  
2000  
1000  
0  
-1000

C NMR 6

166.15  
162.61  
161.85  
156.92  
152.44  
146.68  
134.71  
130.60  
129.74  
129.43  
128.56  
127.33  
126.66  
124.45  
121.49  
115.30

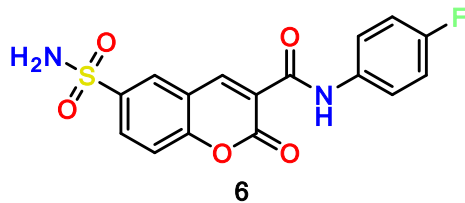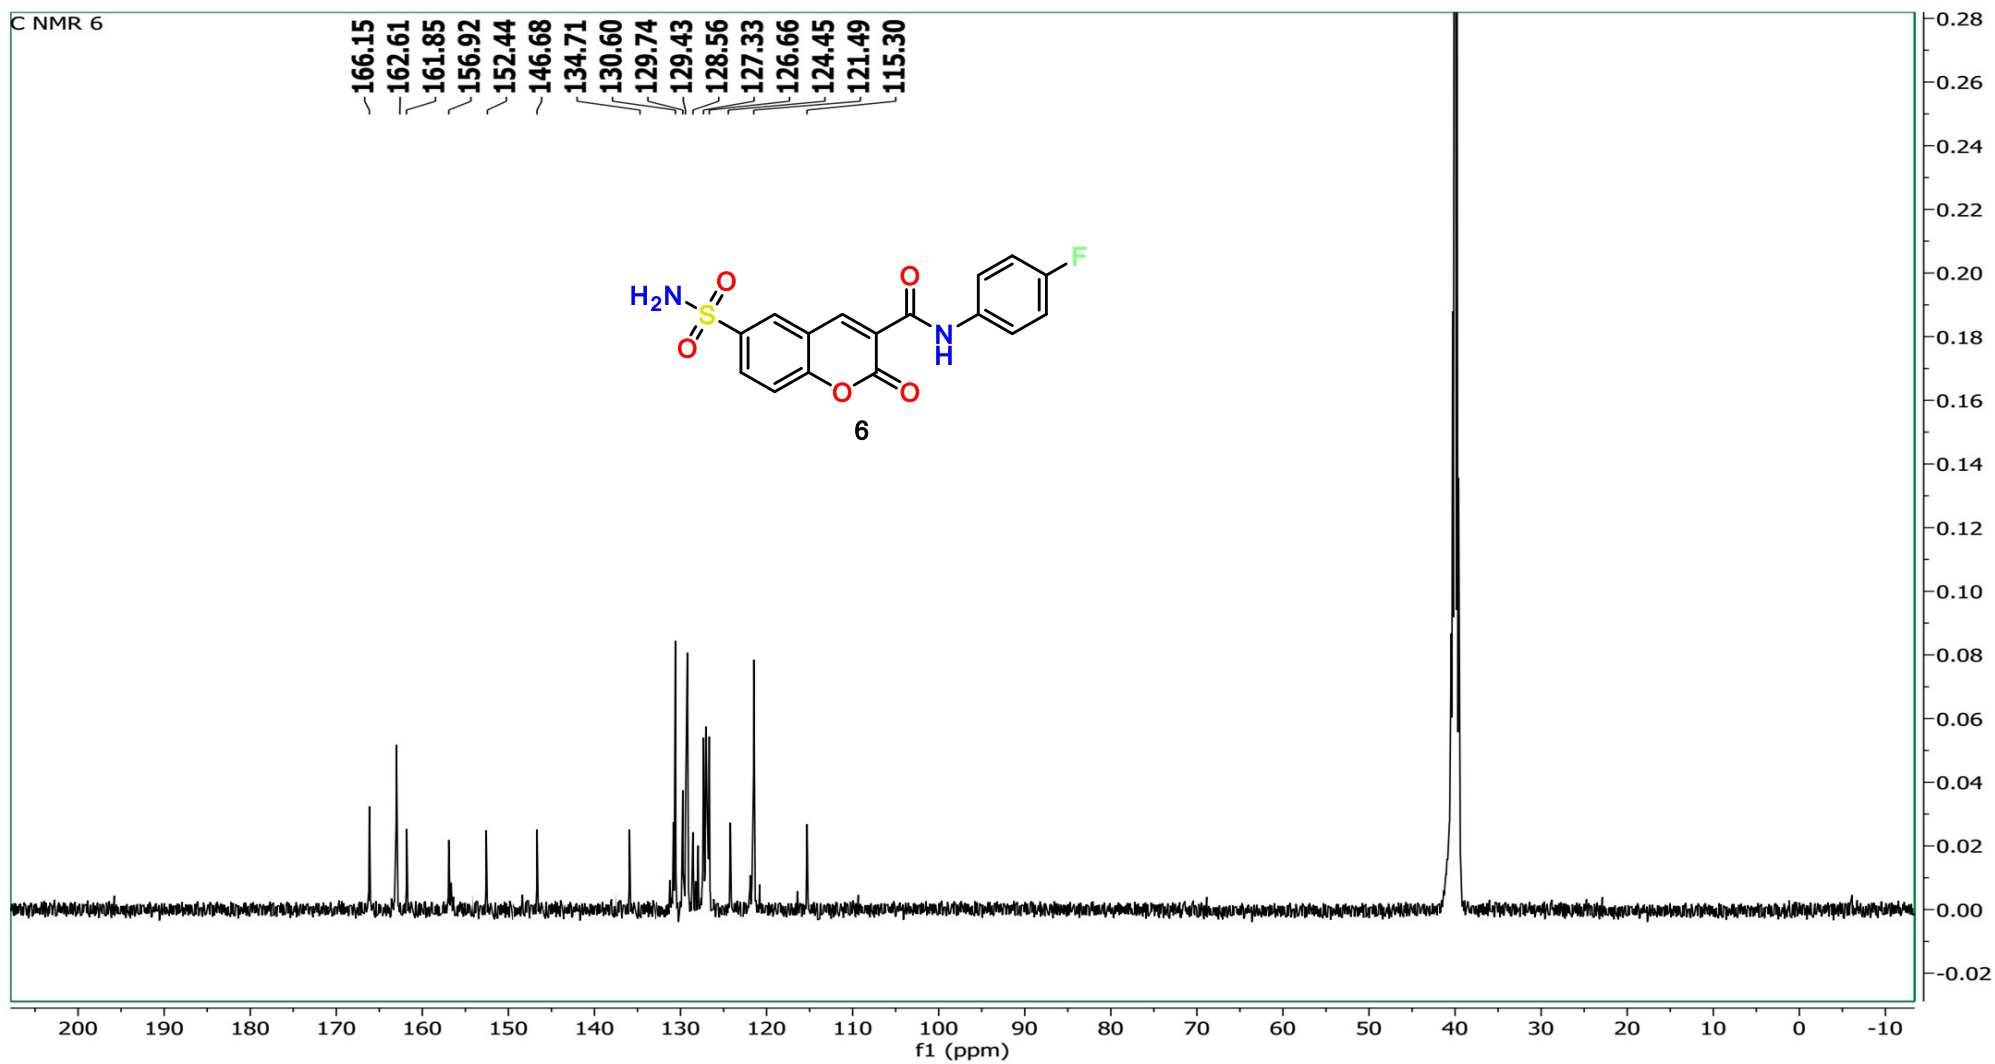



D-mostafa-6-F19  
D-mostafa-6-F19

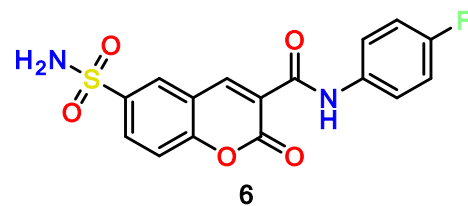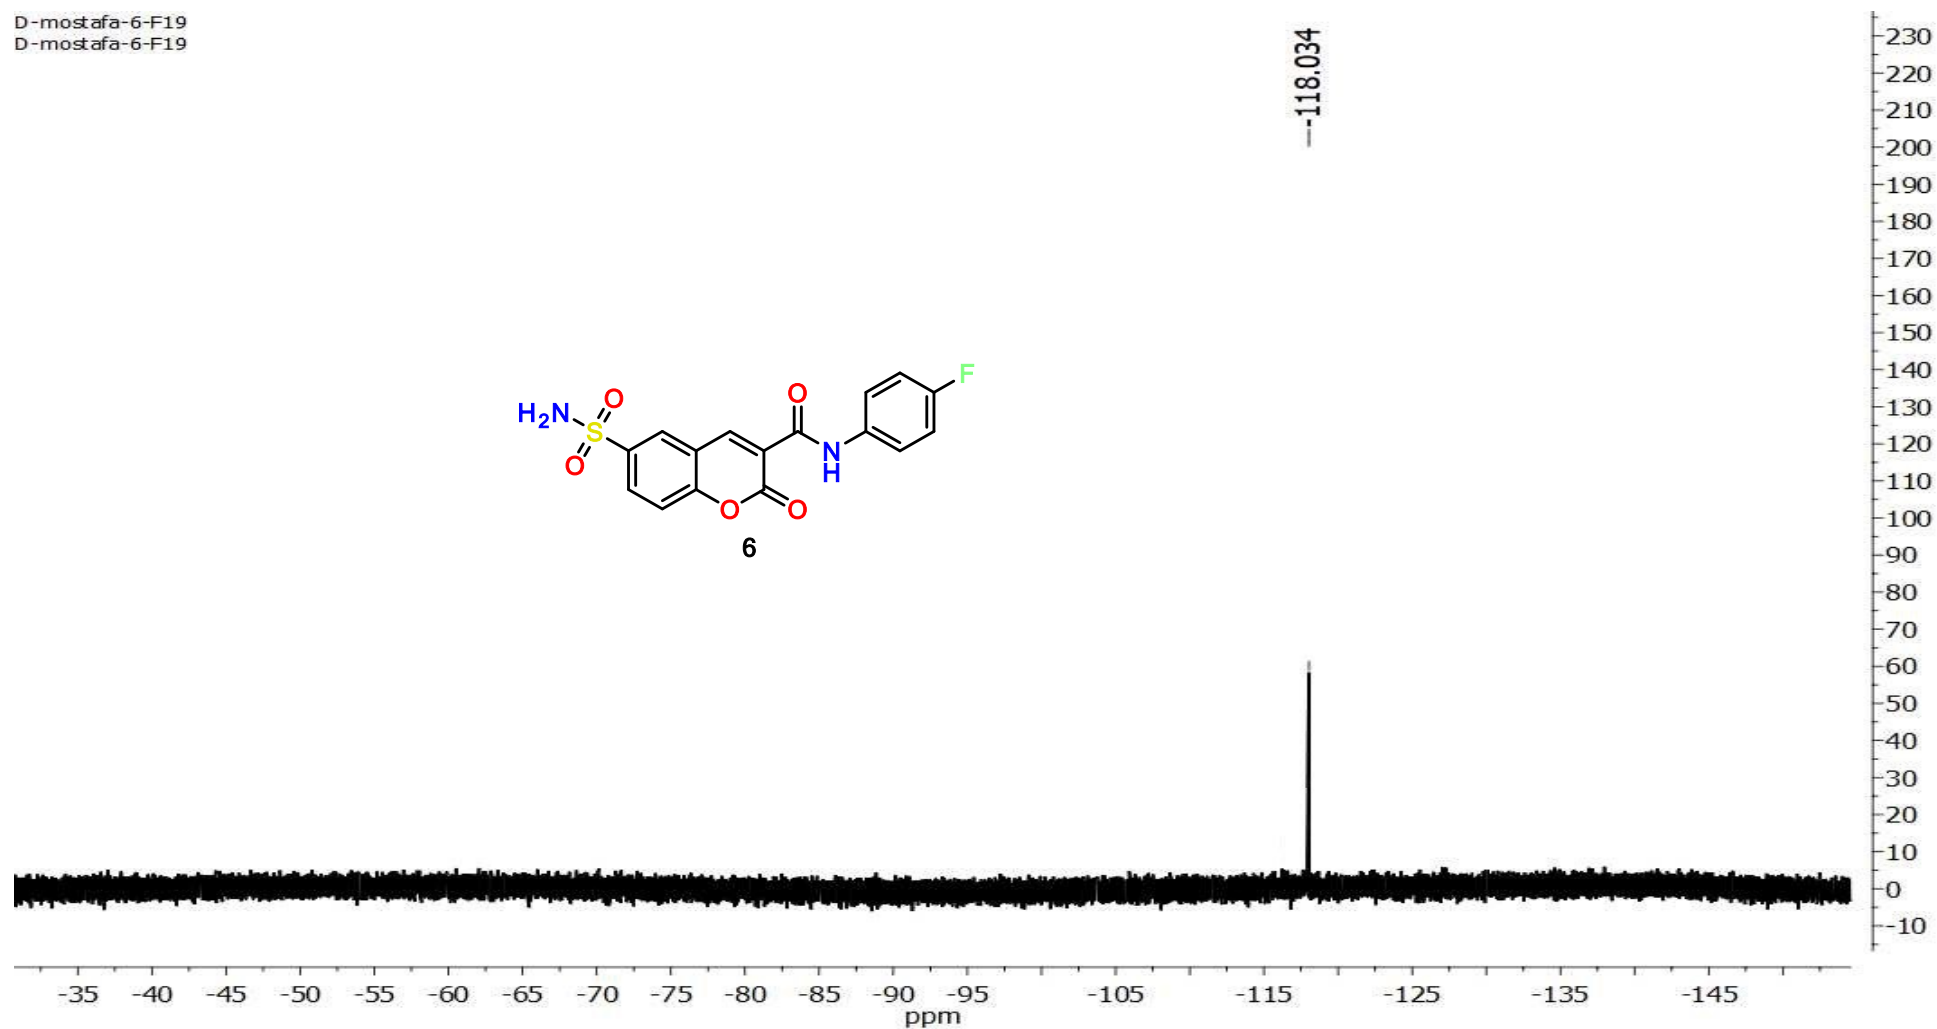

<sup>19</sup>F NMR of compound 6 in (376 MHz, DMSO-d<sub>6</sub>)

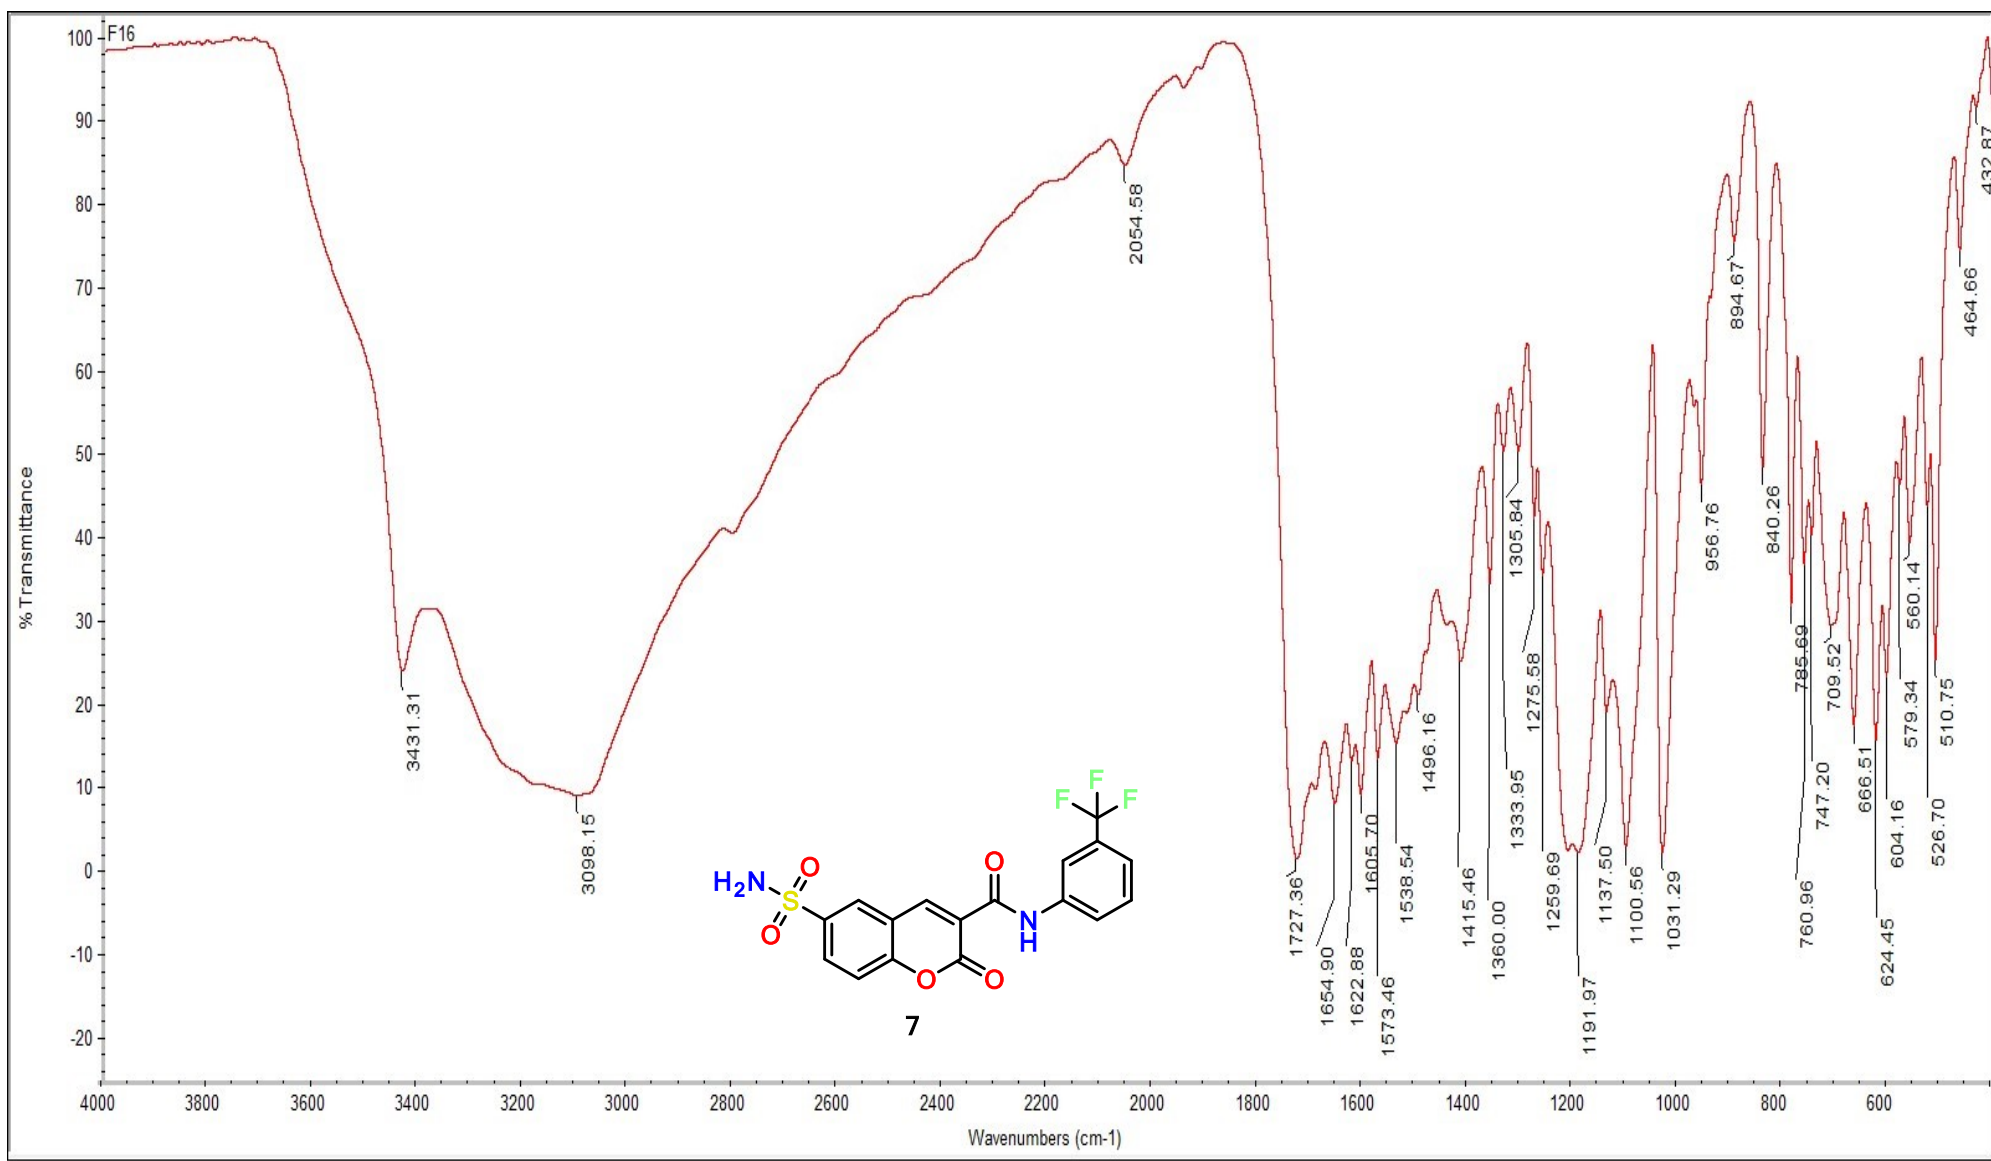

H NMR 7

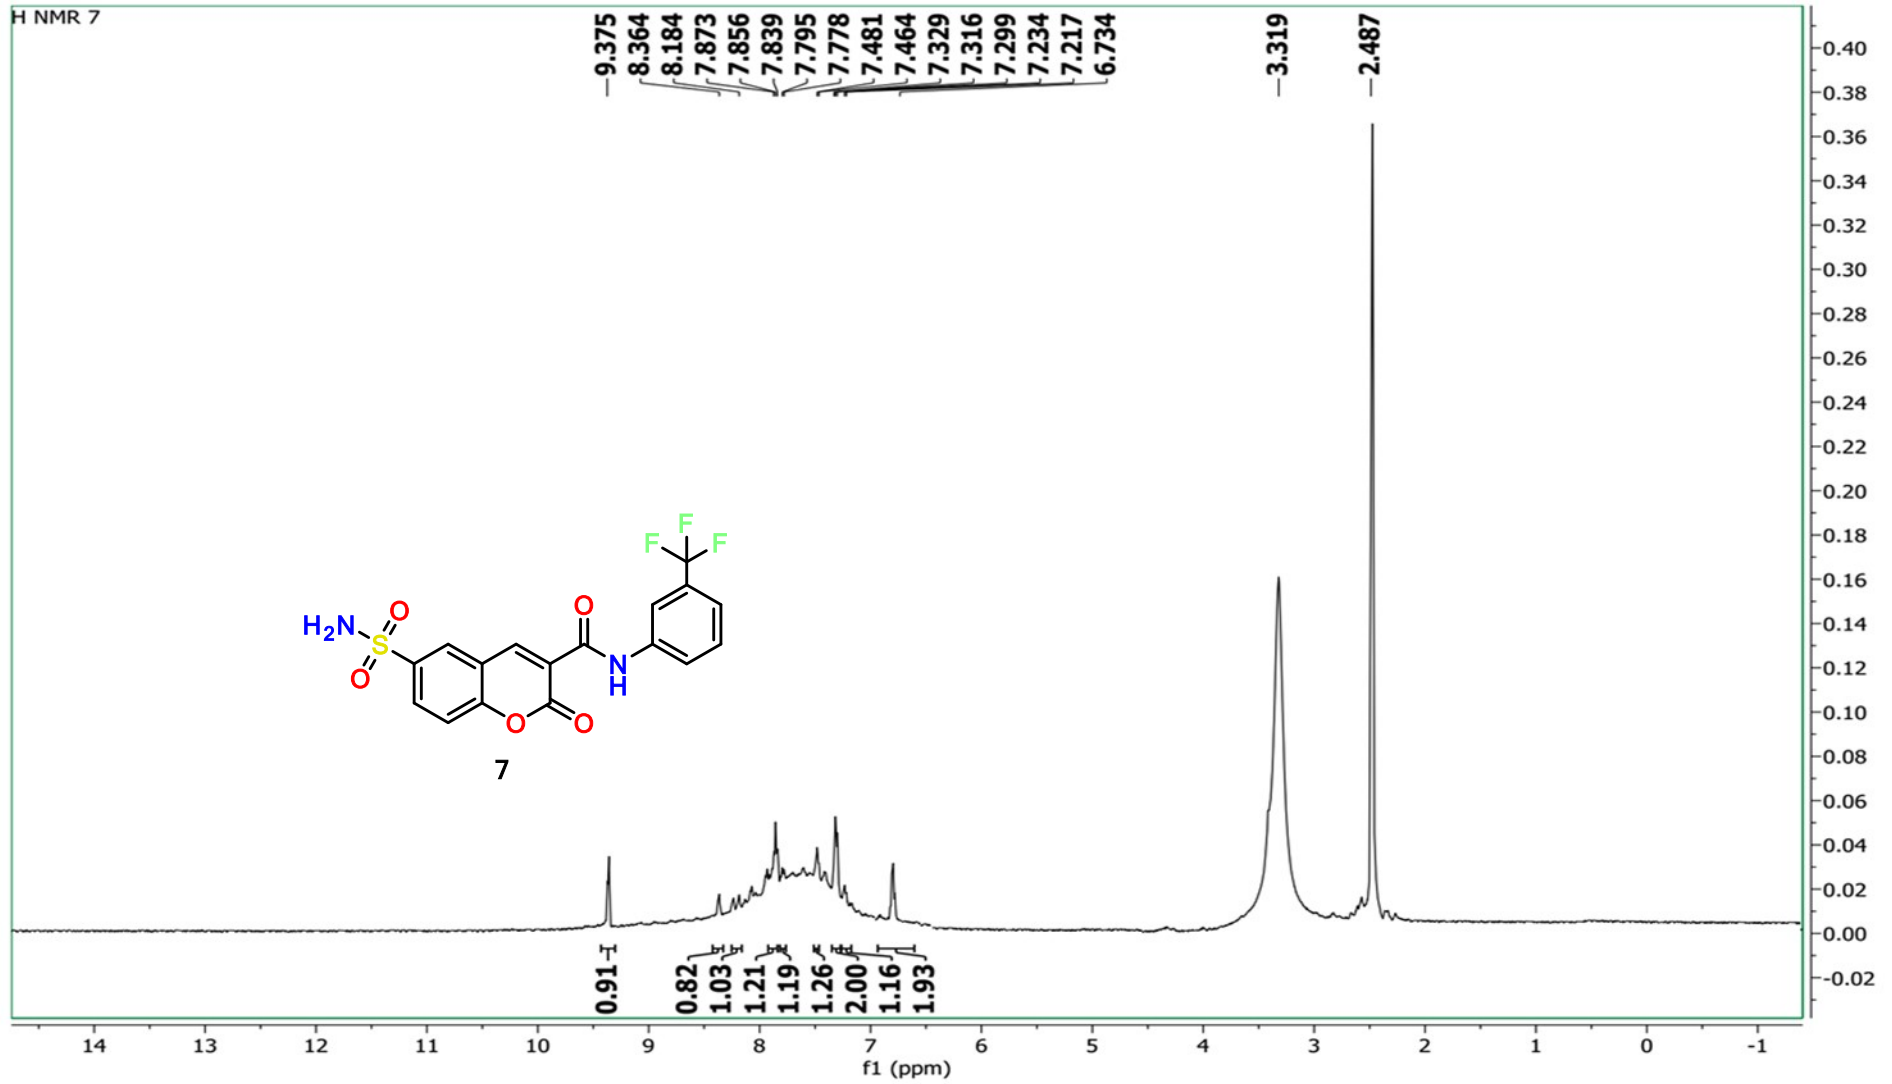

C NMR 7

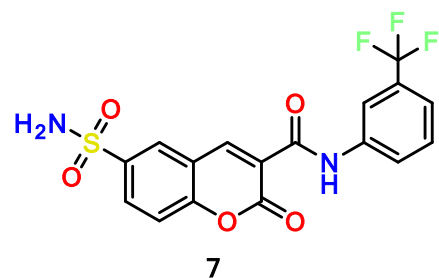

164.34  
159.38  
155.30  
144.24  
136.44  
133.33  
129.64  
127.49  
125.82  
124.25  
123.20  
121.37  
119.07  
118.63  
115.62  
115.34  
111.70

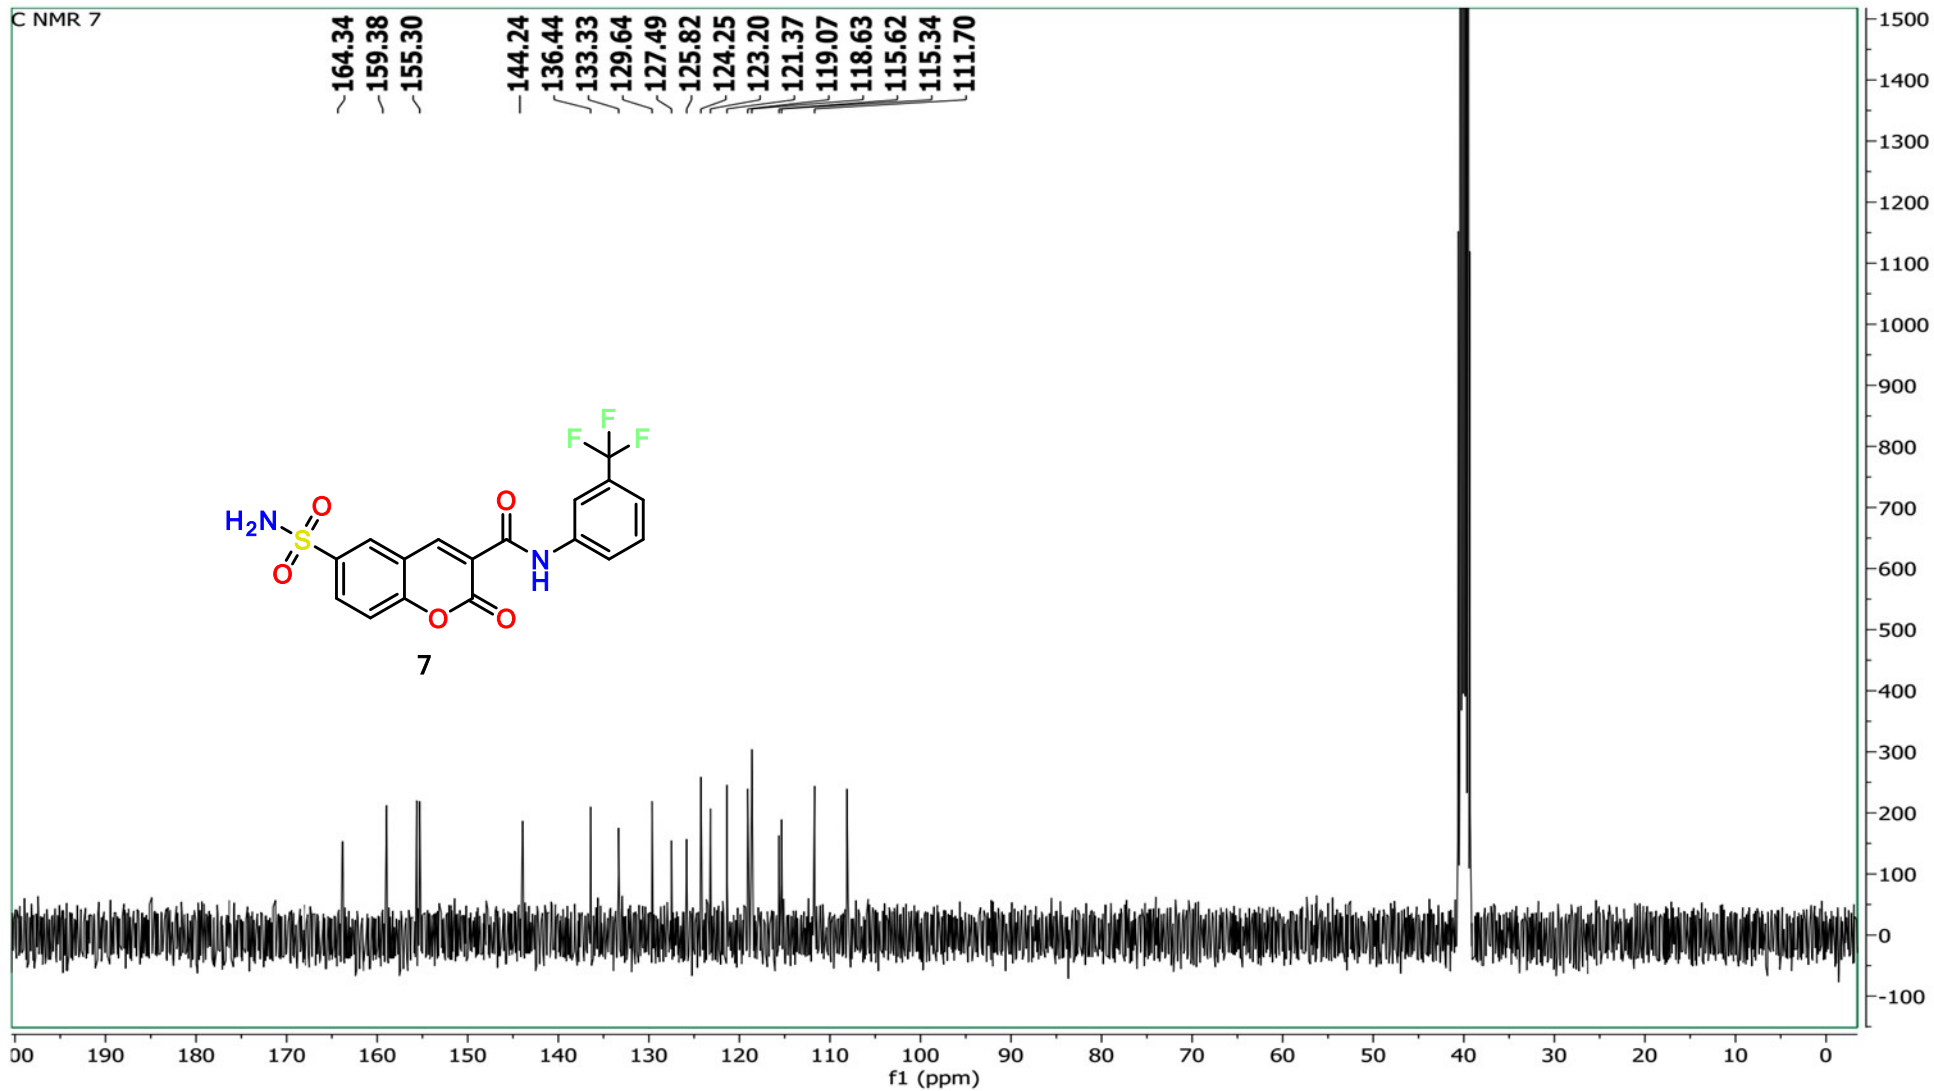

D-mostafa-7-F19  
D-mostafa-7-F19

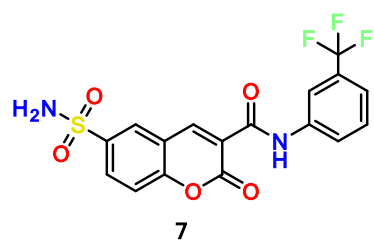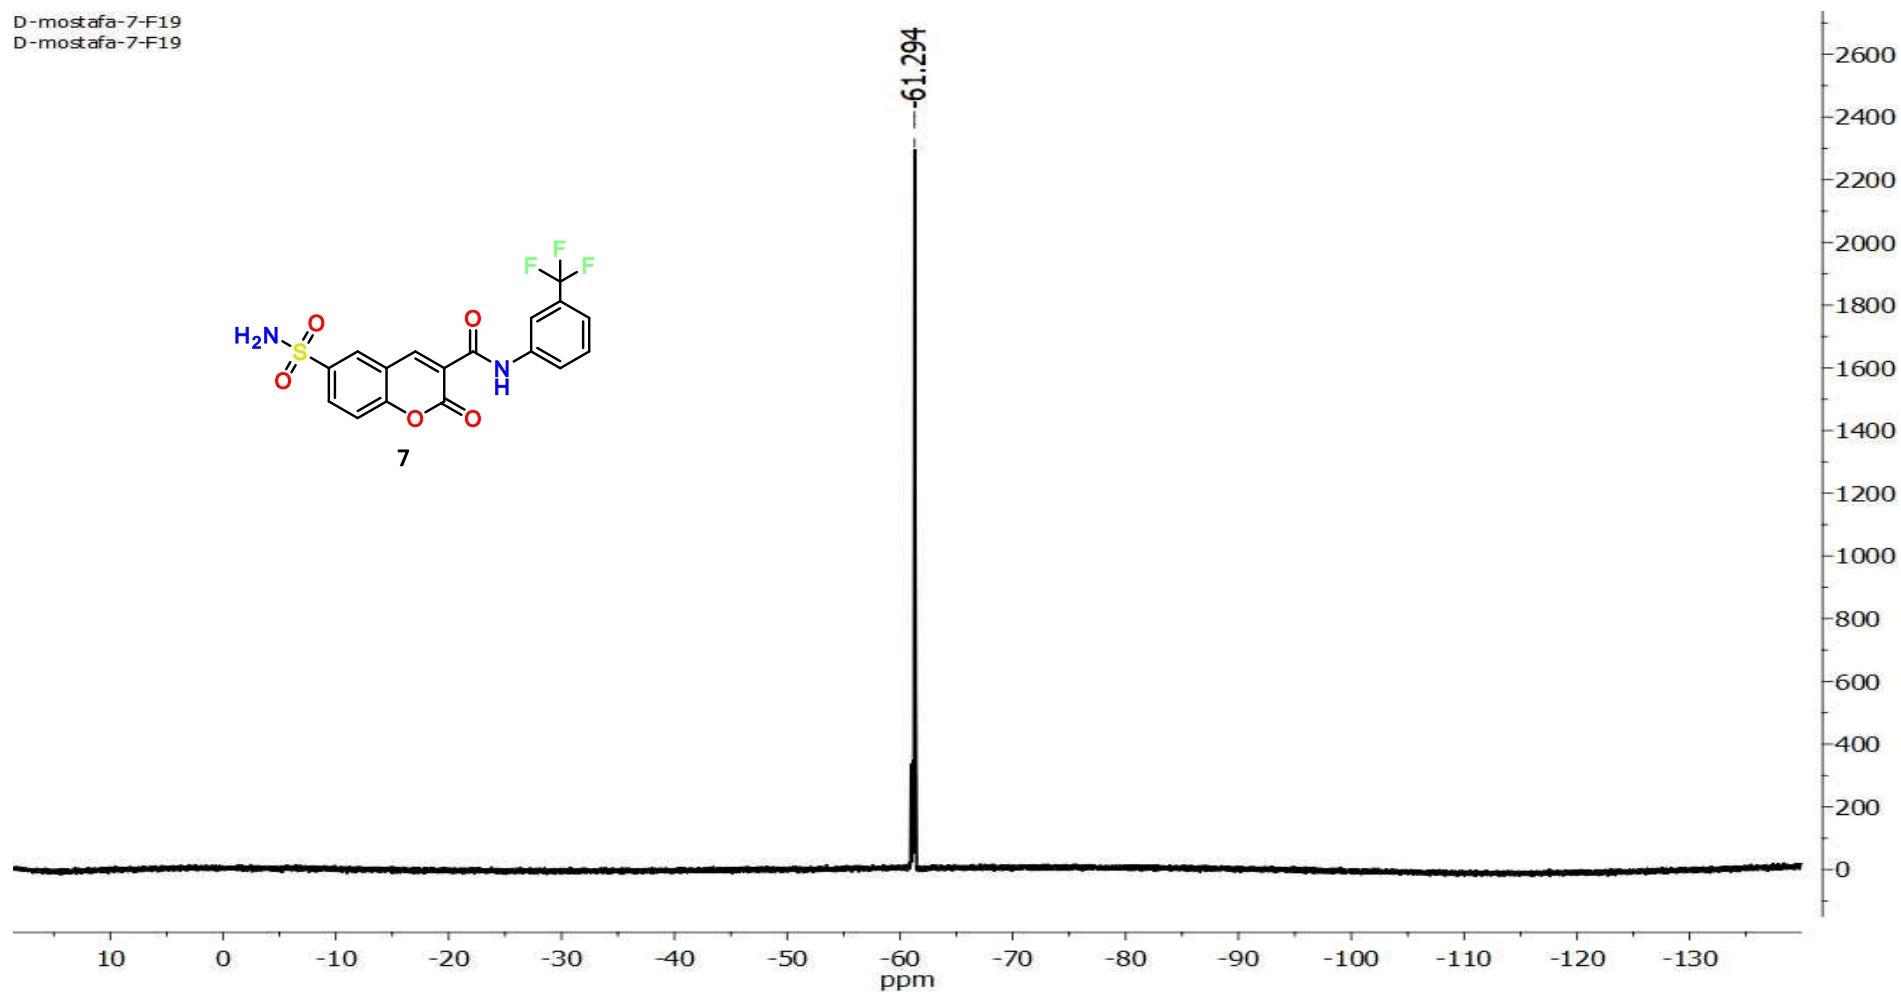

<sup>19</sup>F NMR of compound 7 in (376 MHz, DMSO-d<sub>6</sub>)

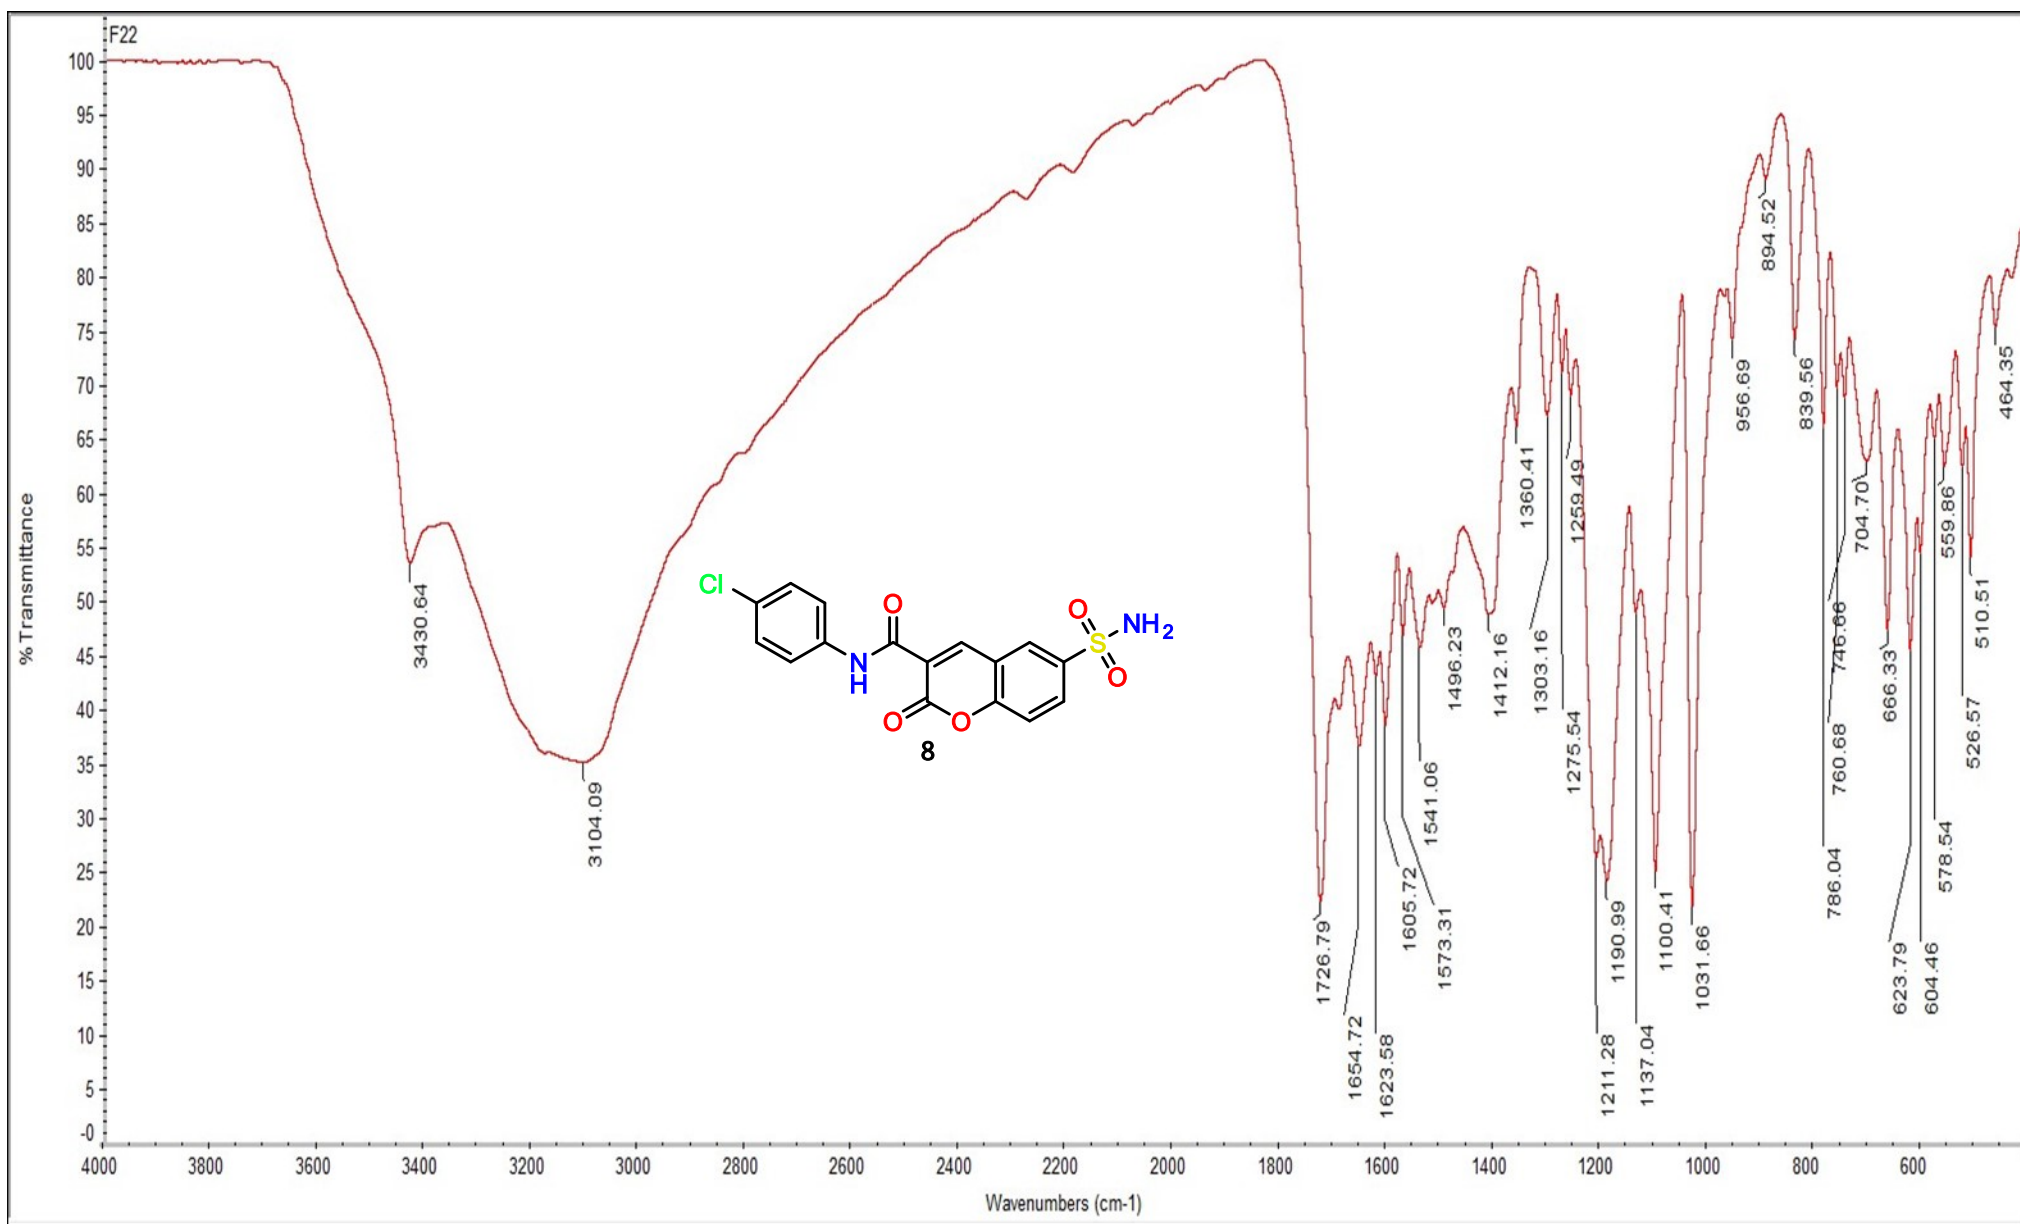

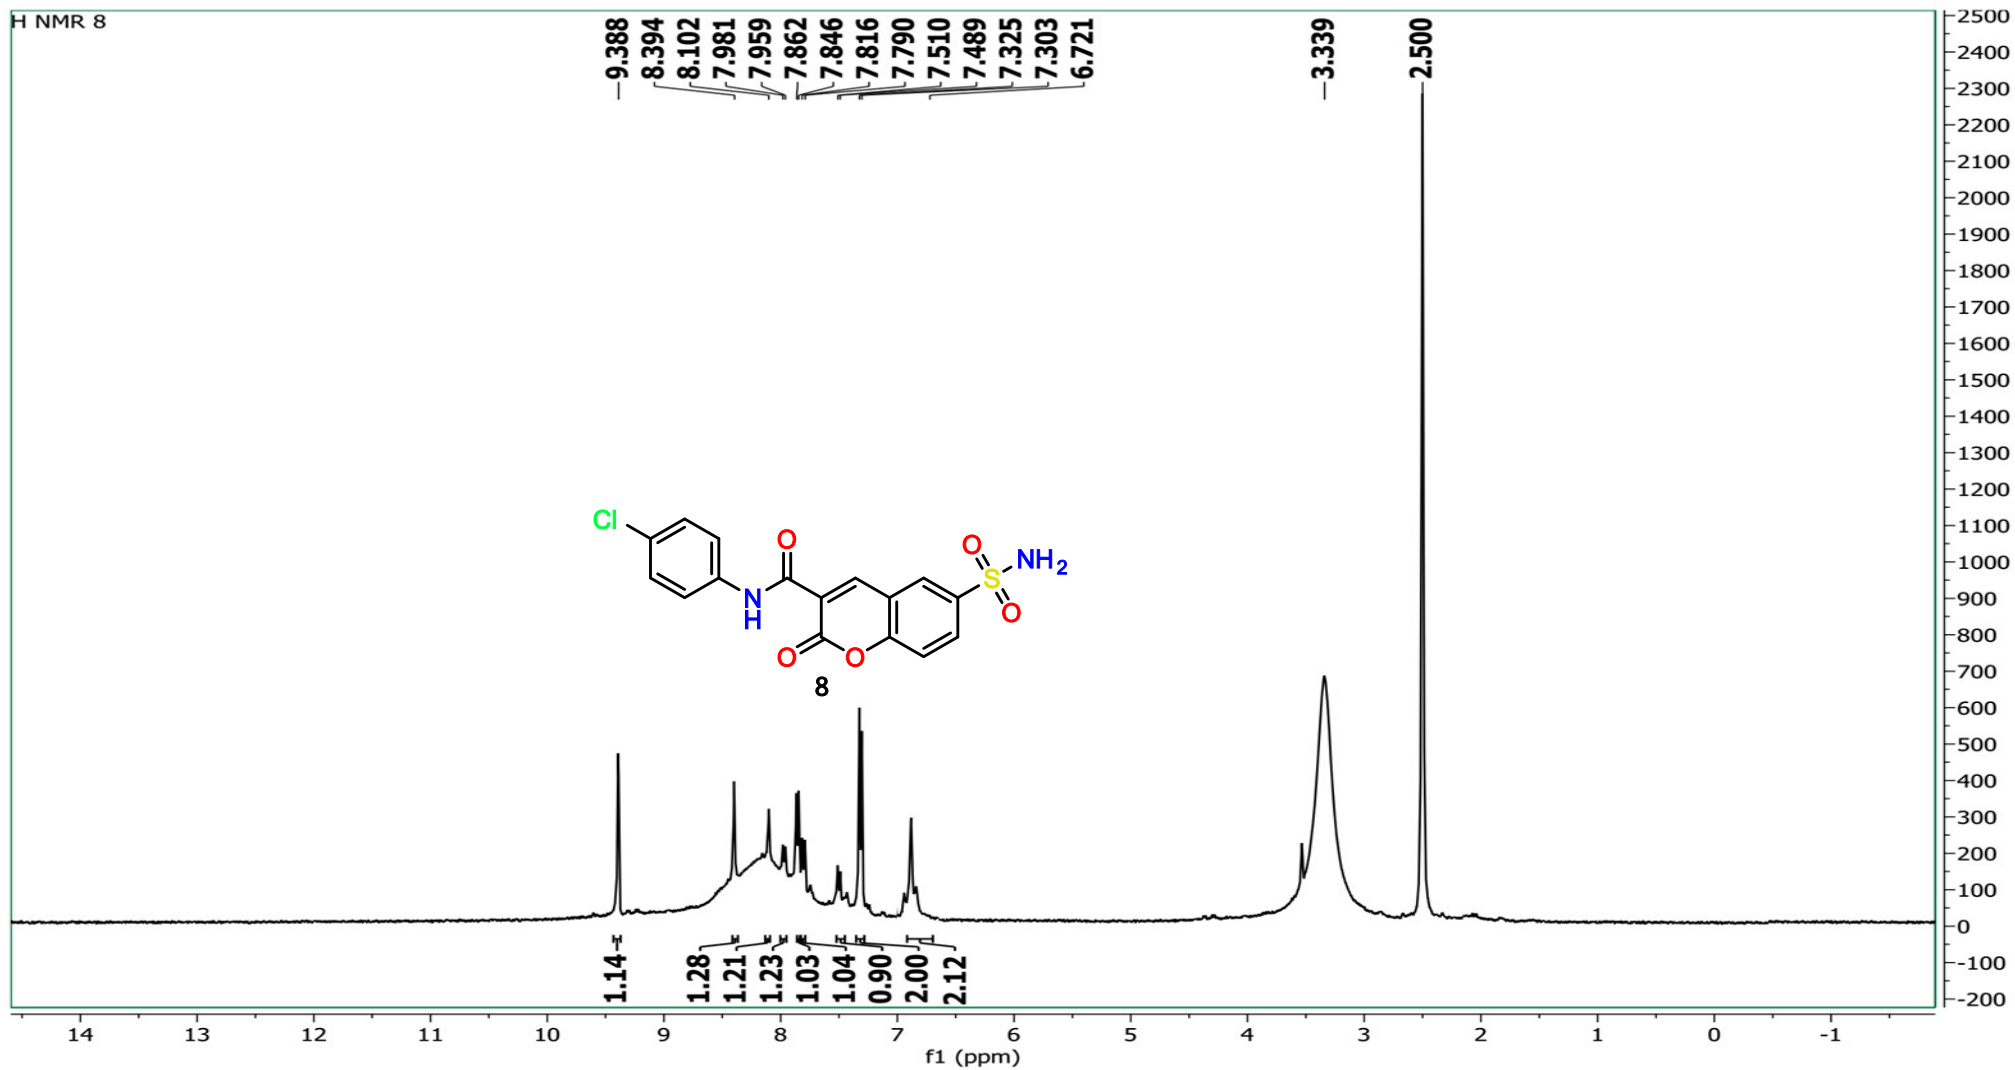

C NMR 8

164.09  
159.44  
153.98  
142.41  
134.88  
133.84  
131.16  
130.57  
128.50  
126.33  
122.40  
119.57  
118.61  
117.77  
116.83  
114.19

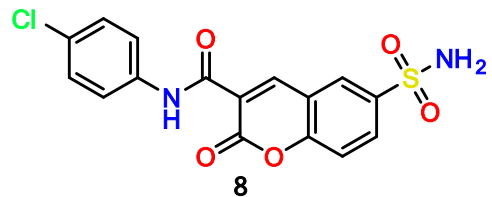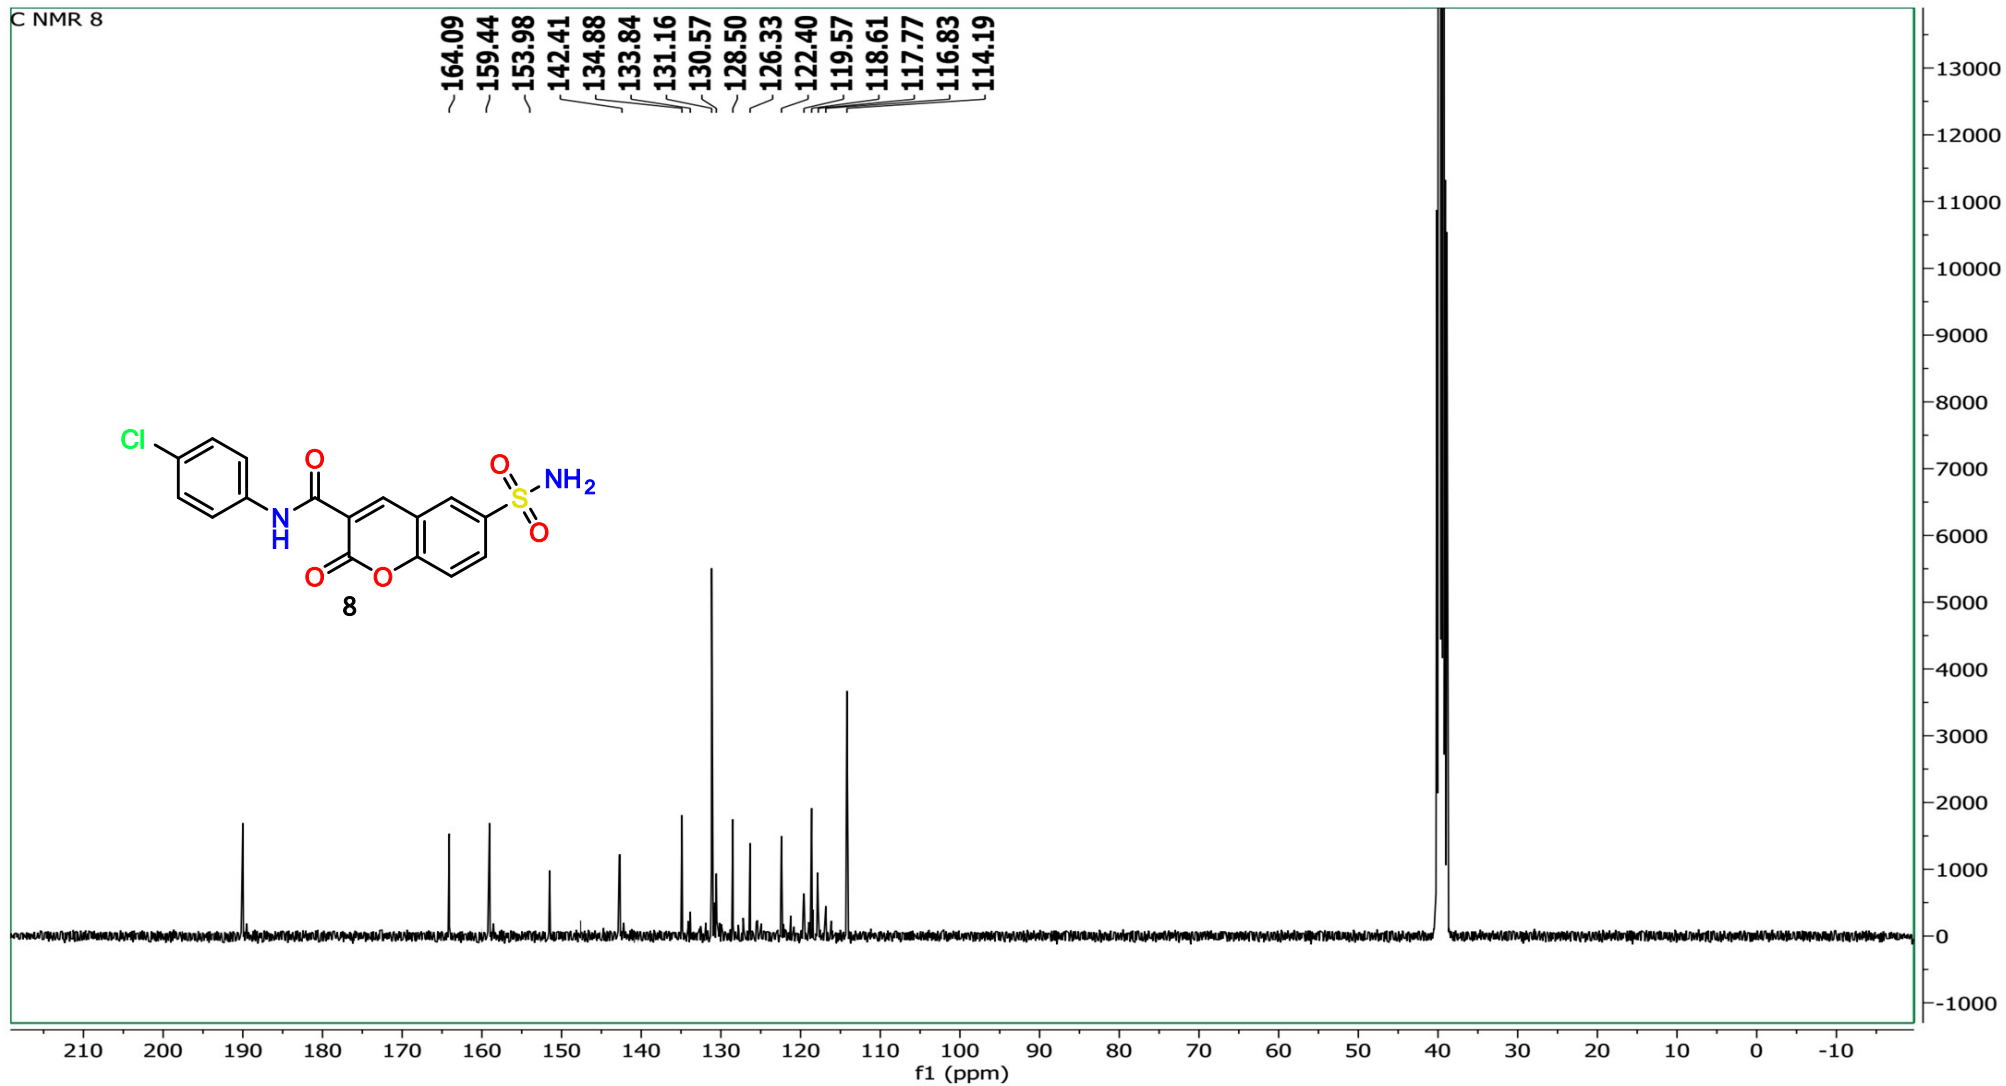



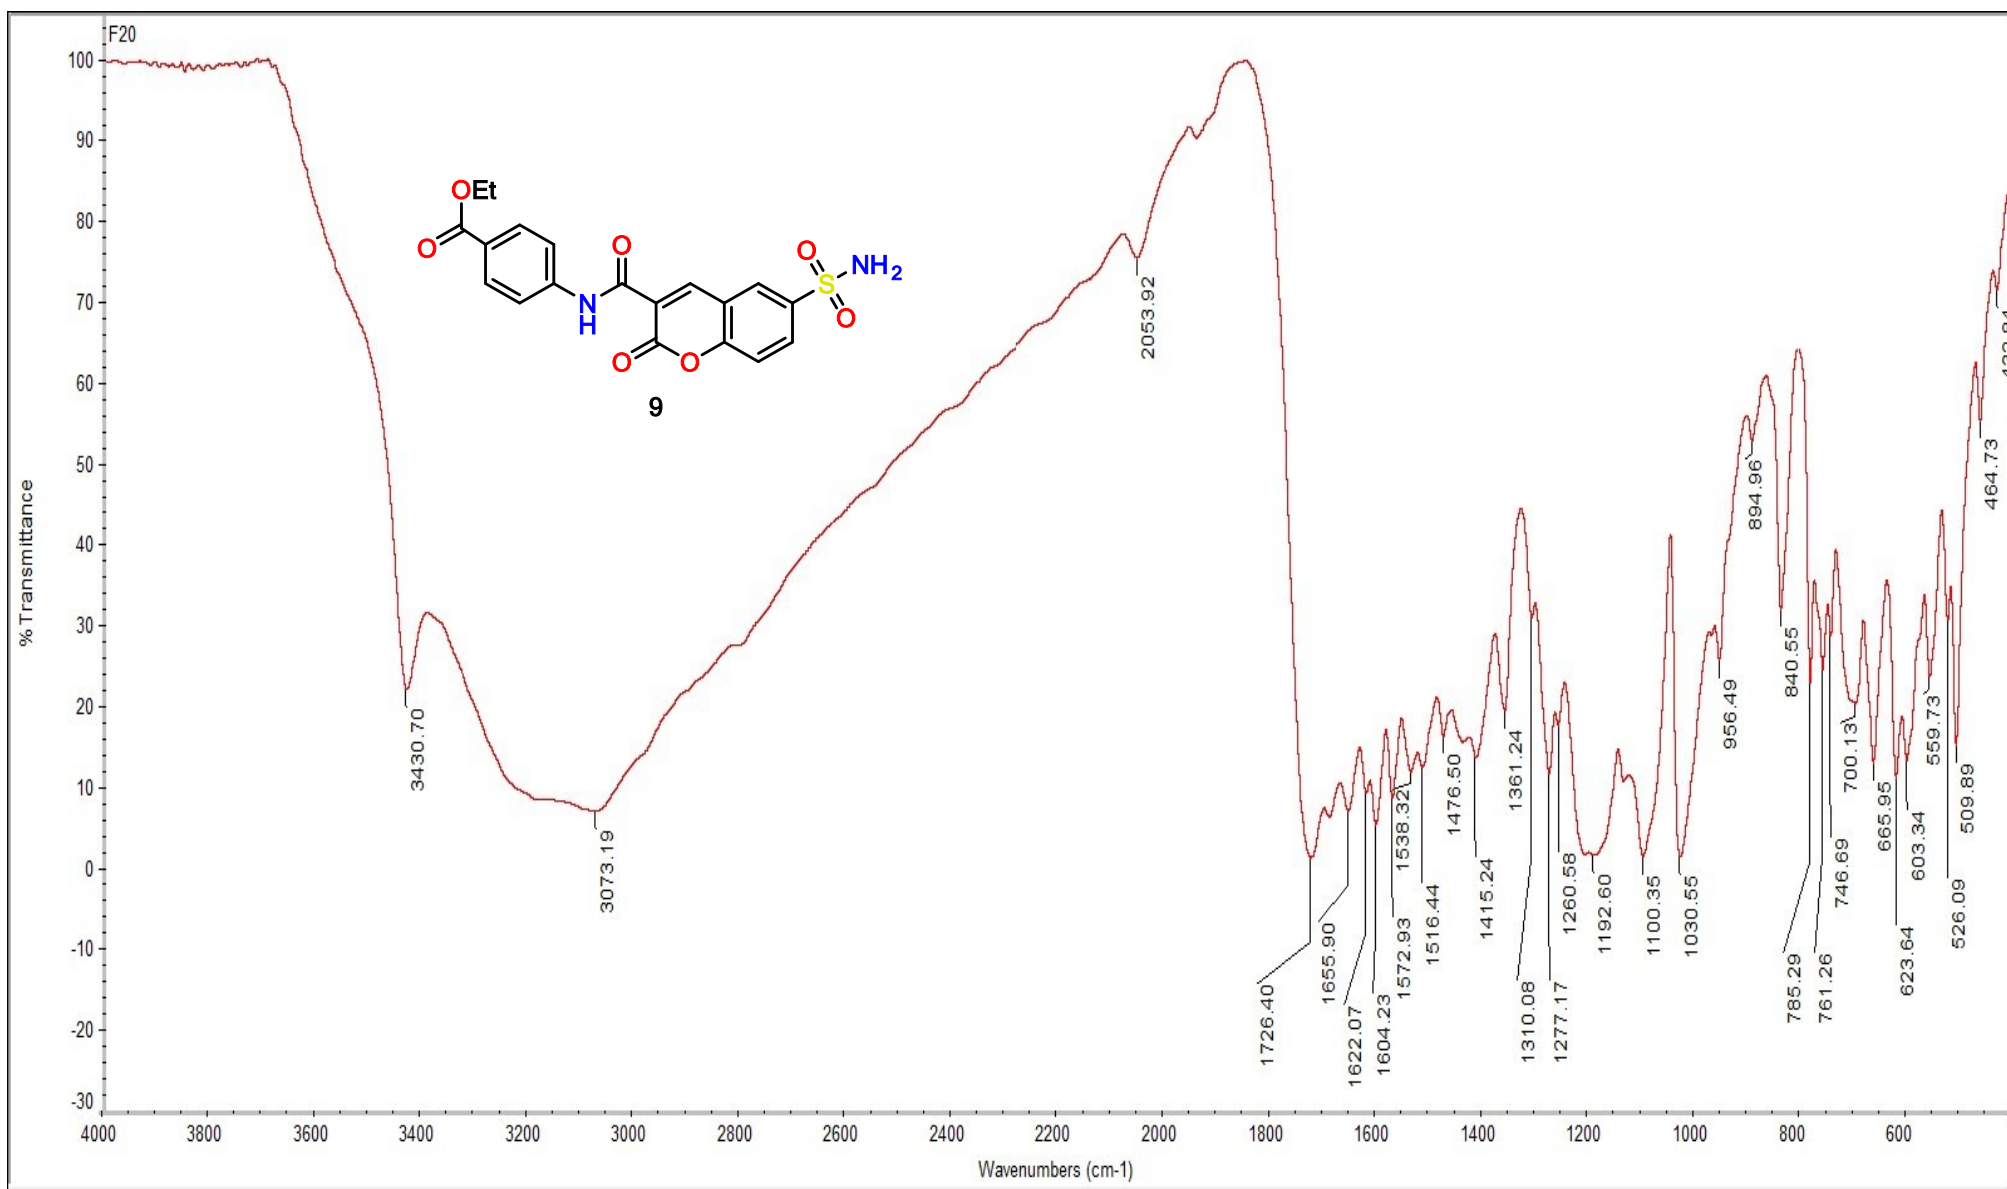

H NMR 9

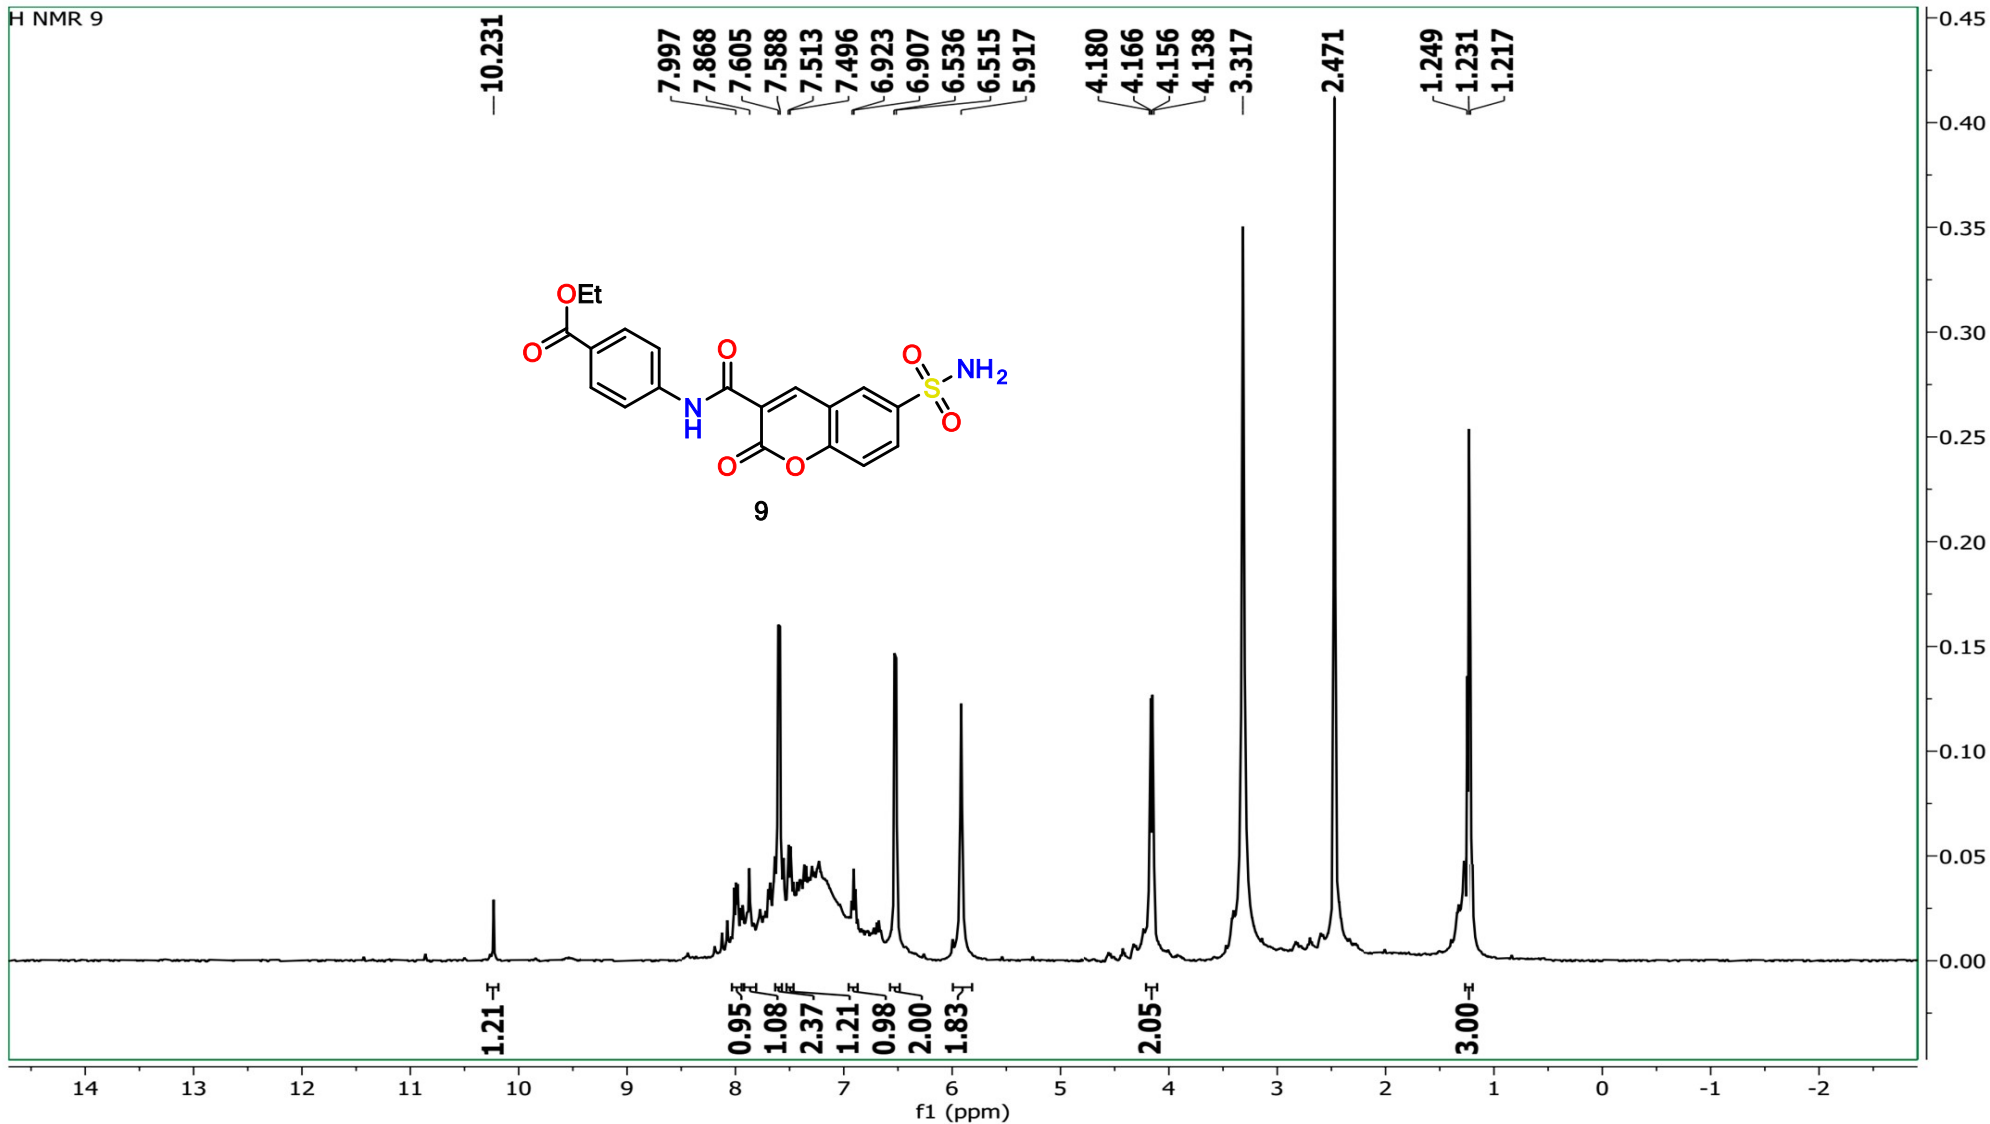

C NMR 9

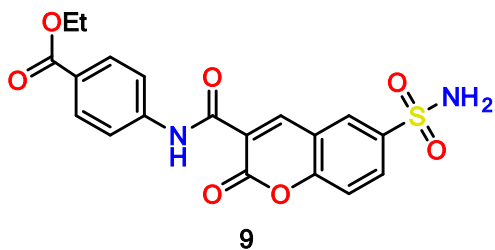

- 166.20
- 163.46
- 157.58
- 155.12
- 144.61
- 140.18
- 138.30
- 134.05
- 132.14
- 130.59
- 128.87
- 127.35
- 124.50
- 120.77
- 116.76
- 115.52
- 115.07

61.03

14.76

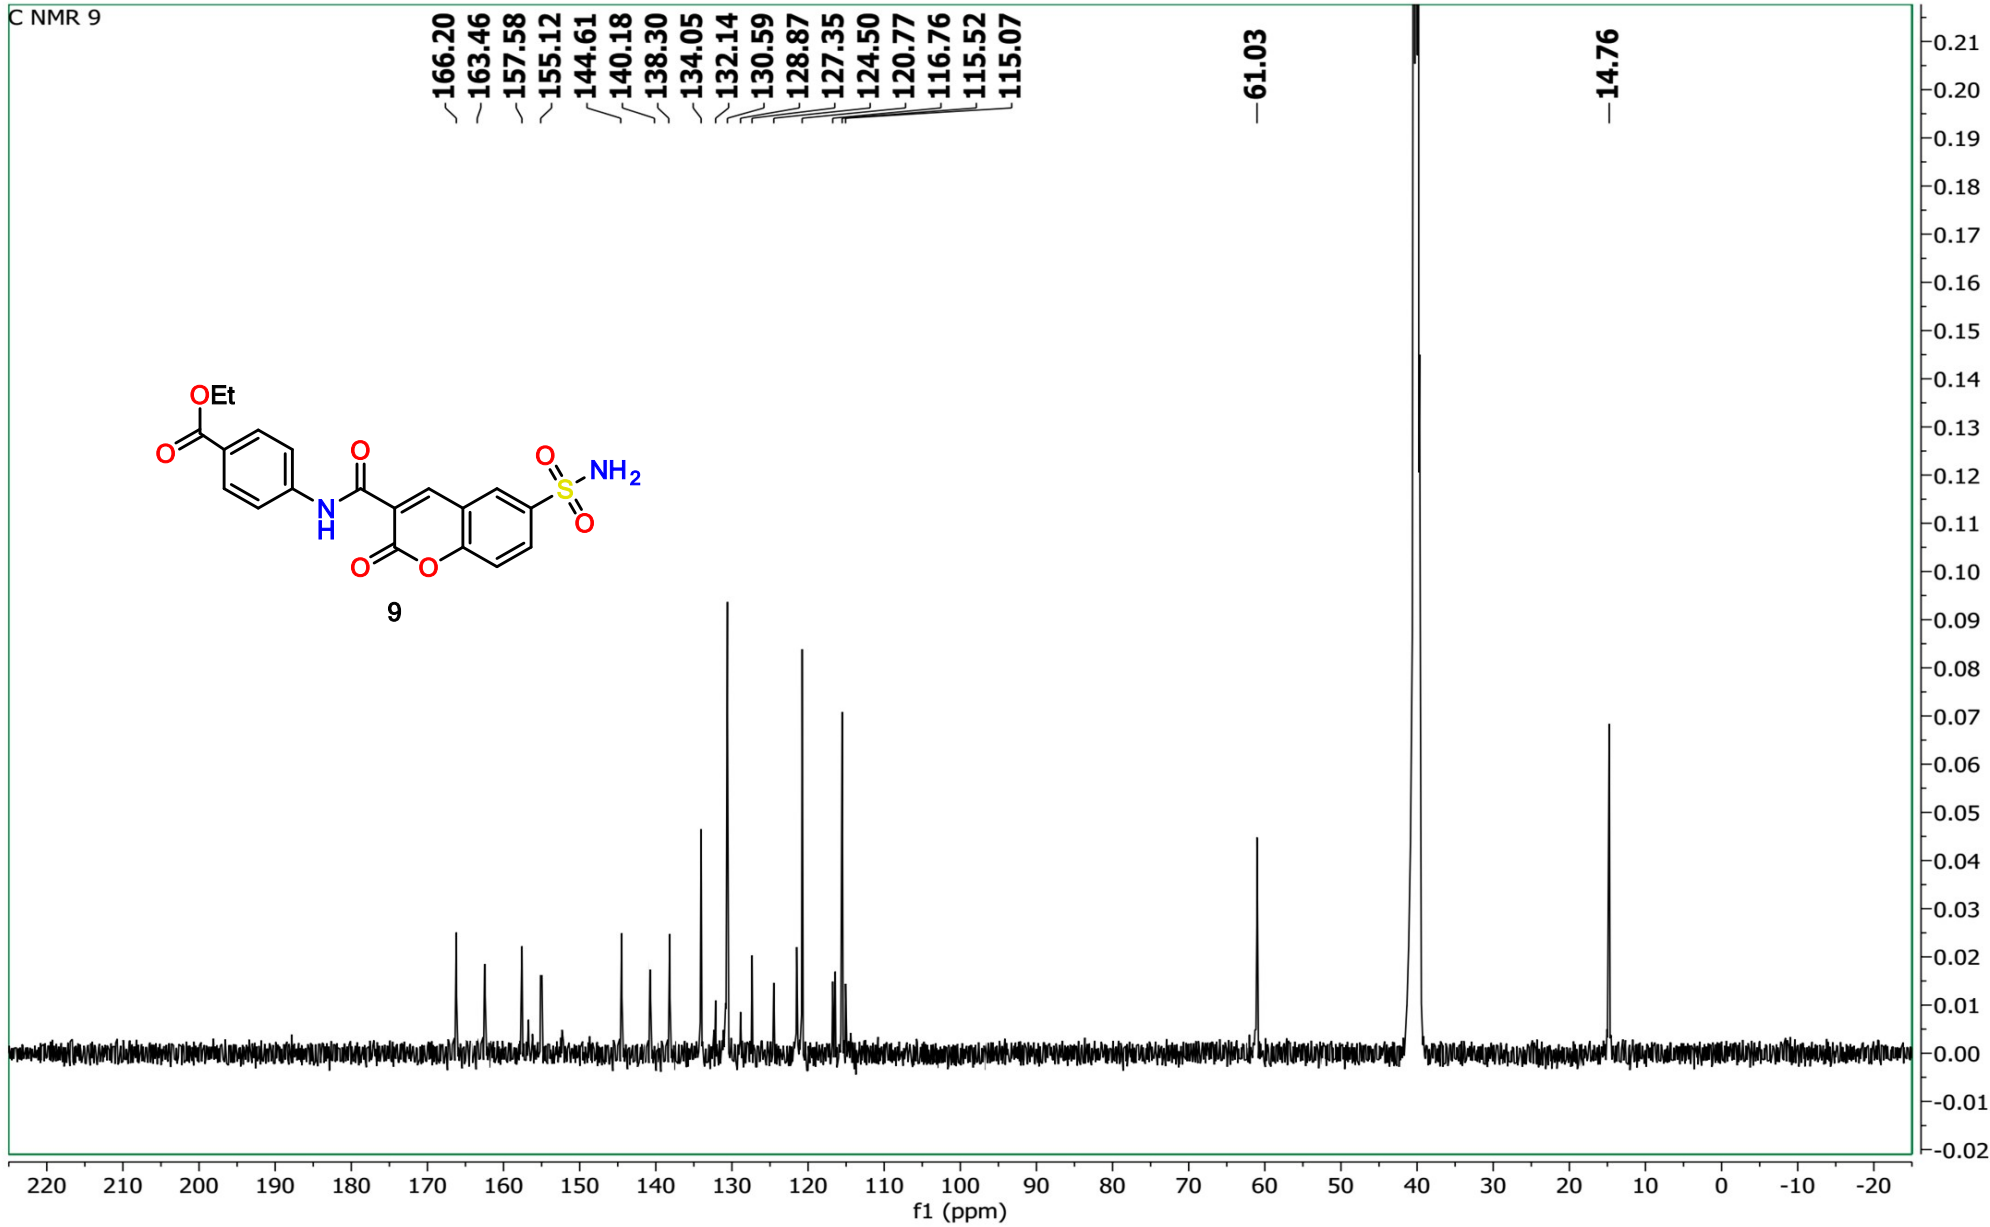

**Biological evaluation**

|                   |                   |        |             |
|-------------------|-------------------|--------|-------------|
| <b>Researcher</b> | : Dr.Yosri ammar  | email: | <b>mob.</b> |
| Date              | : 30-11-2023      |        |             |
| Assay             | : α-Amylase assay |        |             |
| Samples           | : 08 samples .    |        |             |

**Lab Report II**

| ser | compound      |                |            | α- Amylase   | DF=100 |
|-----|---------------|----------------|------------|--------------|--------|
|     | Original code | Manuscript No. | conc mg/ml |              | SD ±   |
| 1   | F3            | 6              | 361.35     | 2.11         | 0.03   |
| 2   | F4            | 2              | 249.24     | 1.75         | 0.01   |
| 3   | F10           | 5              | 297.28     | 32.53        | 0.33   |
| 4   | F16           | 7              | 411.36     | 4.39         | 0.06   |
| 5   | F18           | 3              | 316.29     | 14.62        | 0.16   |
| 6   | F20           | 9              | 415.42     | 1.08         | 0.02   |
| 7   | F22           | 8              | 401.48     | 4.23         | 0.06   |
| 8   | F6            | 4              | 267.26     | <b>8.551</b> | 0.312  |
| *** | Acarbose      |                | 361.35     | <b>0.43</b>  | 0.01   |

**Detailed results.**

**α- Amylase**

| Code | IC50 | conc | log  | %inh | T2 | T1 | ΔT    | RFU2 | RFU1  | ΔRFU  | slope  | K.Activity |
|------|------|------|------|------|----|----|-------|------|-------|-------|--------|------------|
| f3   | 100  | 2    | 95.4 | 30   | 0  | 30 | 4.62  | 0    | 4.62  | 3.333 | 5.544  |            |
|      | 10   | 1    | 88.6 | 30   | 0  | 30 | 11.41 | 0    | 11.41 | 3.333 | 13.692 |            |
|      | 1    | 0    | 81.2 | 30   | 0  | 30 | 18.77 | 0    | 18.77 | 3.333 | 22.524 |            |
|      | 0.1  | -1   | 70.1 | 30   | 0  | 30 | 29.91 | 0    | 29.91 | 3.333 | 35.892 |            |
|      | 0.01 | -2   | 43.7 | 30   | 0  | 30 | 56.29 | 0    | 56.29 | 3.333 | 67.548 |            |
| EC   |      |      | 0    | 30   | 0  | 30 | 100   | 0    | 100   | 3.333 | 120    |            |
| code | IC50 | conc | log  | %inh | T2 | T1 | ΔT    | RFU2 | RFU1  | ΔRFU  | slope  | K.Activity |
| f4   | 100  | 2    | 96.1 | 30   | 0  | 30 | 3.88  | 0    | 3.88  | 3.333 | 4.656  |            |
|      | 10   | 1    | 91.2 | 30   | 0  | 30 | 8.79  | 0    | 8.79  | 3.333 | 10.548 |            |
|      | 1    | 0    | 77.8 | 30   | 0  | 30 | 22.15 | 0    | 22.15 | 3.333 | 26.58  |            |
|      | 0.1  | -1   | 68.9 | 30   | 0  | 30 | 31.14 | 0    | 31.14 | 3.333 | 37.368 |            |
|      | 0.01 | -2   | 50.3 | 30   | 0  | 30 | 49.67 | 0    | 49.67 | 3.333 | 59.604 |            |
| EC   |      |      | 0    | 30   | 0  | 30 | 100   | 0    | 100   | 3.333 | 120    |            |
| code | IC50 | conc | log  | %inh | T2 | T1 | ΔT    | RFU2 | RFU1  | ΔRFU  | slope  | K.Activity |
| f10  | 100  | 2    | 93.4 | 30   | 0  | 30 | 6.59  | 0    | 6.59  | 3.333 | 7.908  |            |

|    |      |    |      |    |   |    |       |   |       |       |        |
|----|------|----|------|----|---|----|-------|---|-------|-------|--------|
|    | 10   | 1  | 85.6 | 30 | 0 | 30 | 14.38 | 0 | 14.38 | 3.333 | 17.256 |
|    | 1    | 0  | 72   | 30 | 0 | 30 | 28.02 | 0 | 28.02 | 3.333 | 33.624 |
|    | 0.1  | -1 | 48.8 | 30 | 0 | 30 | 51.18 | 0 | 51.18 | 3.333 | 61.416 |
|    | 0.01 | -2 | 31.6 | 30 | 0 | 30 | 68.43 | 0 | 68.43 | 3.333 | 82.116 |
| EC |      |    | 0    | 30 | 0 | 30 | 100   | 0 | 100   | 3.333 | 120    |

| code | IC50 | conc | log  | %inh | T2 | T1 | ΔT    | RFU2 | RFU1  | ΔRFU  | slope  | K.Activity |
|------|------|------|------|------|----|----|-------|------|-------|-------|--------|------------|
| f16  | 100  | 2    | 96.2 | 30   | 0  | 30 | 3.76  | 0    | 3.76  | 3.333 | 4.512  |            |
|      | 10   | 1    | 89.6 | 30   | 0  | 30 | 10.42 | 0    | 10.42 | 3.333 | 12.504 |            |
|      | 1    | 0    | 80.8 | 30   | 0  | 30 | 19.15 | 0    | 19.15 | 3.333 | 22.98  |            |
|      | 0.1  | -1   | 54.9 | 30   | 0  | 30 | 45.13 | 0    | 45.13 | 3.333 | 54.156 |            |
|      | 0.01 | -2   | 46.1 | 30   | 0  | 30 | 53.89 | 0    | 53.89 | 3.333 | 64.668 |            |
| EC   |      |      | 0    | 30   | 0  | 30 | 100   | 0    | 100   | 3.333 | 120    |            |

| code | IC50 | conc | log  | %inh | T2 | T1 | ΔT    | RFU2 | RFU1  | ΔRFU  | slope  | K.Activity |
|------|------|------|------|------|----|----|-------|------|-------|-------|--------|------------|
| f18  | 100  | 2    | 96   | 30   | 0  | 30 | 3.99  | 0    | 3.99  | 3.333 | 4.788  |            |
|      | 10   | 1    | 88   | 30   | 0  | 30 | 12.03 | 0    | 12.03 | 3.333 | 14.436 |            |
|      | 1    | 0    | 73.5 | 30   | 0  | 30 | 26.51 | 0    | 26.51 | 3.333 | 31.812 |            |
|      | 0.1  | -1   | 60.2 | 30   | 0  | 30 | 39.77 | 0    | 39.77 | 3.333 | 47.724 |            |
|      | 0.01 | -2   | 33.8 | 30   | 0  | 30 | 66.18 | 0    | 66.18 | 3.333 | 79.416 |            |
| EC   |      |      | 0    | 30   | 0  | 30 | 100   | 0    | 100   | 3.333 | 120    |            |

| code | IC50 | conc | log | %inh | T2 | T1 | ΔT | RFU2  | RFU1 | ΔRFU  | slope | K.Activity |
|------|------|------|-----|------|----|----|----|-------|------|-------|-------|------------|
| f20  |      | 100  | 2   | 96.6 | 30 | 0  | 30 | 3.39  | 0    | 3.39  | 3.333 | 4.068      |
|      |      | 10   | 1   | 90   | 30 | 0  | 30 | 9.95  | 0    | 9.95  | 3.333 | 11.94      |
|      |      | 1    | 0   | 82.6 | 30 | 0  | 30 | 17.41 | 0    | 17.41 | 3.333 | 20.892     |
|      |      | 0.1  | -1  | 73.5 | 30 | 0  | 30 | 26.54 | 0    | 26.54 | 3.333 | 31.848     |
|      |      | 0.01 | -2  | 45.8 | 30 | 0  | 30 | 54.15 | 0    | 54.15 | 3.333 | 64.98      |
| EC   |      |      |     | 0    | 30 | 0  | 30 | 100   | 0    | 100   | 3.333 | 120        |
| code | IC50 | conc | log | %inh | T2 | T1 | ΔT | RFU2  | RFU1 | ΔRFU  | slope | K.Activity |
| f22  |      | 100  | 2   | 95.4 | 30 | 0  | 30 | 4.61  | 0    | 4.61  | 3.333 | 5.532      |
|      |      | 10   | 1   | 88.6 | 30 | 0  | 30 | 11.39 | 0    | 11.39 | 3.333 | 13.668     |
|      |      | 1    | 0   | 75.8 | 30 | 0  | 30 | 24.16 | 0    | 24.16 | 3.333 | 28.992     |
|      |      | 0.1  | -1  | 60.5 | 30 | 0  | 30 | 39.51 | 0    | 39.51 | 3.333 | 47.412     |
|      |      | 0.01 | -2  | 44.5 | 30 | 0  | 30 | 55.47 | 0    | 55.47 | 3.333 | 66.564     |
| EC   |      |      |     | 0    | 30 | 0  | 30 | 100   | 0    | 100   | 3.333 | 120        |
| F6   | IC50 | conc | log | %inh | T2 | T1 | ΔT | RFU2  | RFU1 | ΔRFU  | slope | K.Activity |
|      |      | 100  | 2   | 94.2 | 30 | 0  | 30 | 5.75  | 0    | 5.75  | 3.333 | 6.9        |
|      |      | 10   | 1   | 84.7 | 30 | 0  | 30 | 15.29 | 0    | 15.29 | 3.333 | 18.348     |
|      |      | 1    | 0   | 70.5 | 30 | 0  | 30 | 29.46 | 0    | 29.46 | 3.333 | 35.352     |
|      |      | 0.1  | -1  | 52.6 | 30 | 0  | 30 | 47.41 | 0    | 47.41 | 3.333 | 56.892     |
|      |      | 0.01 | -2  | 31.8 | 30 | 0  | 30 | 68.22 | 0    | 68.22 | 3.333 | 81.864     |

|          |      |      |     | 0    | 30 | 0  | 30 | 100   | 0    | 100   | 3.333 | 120        |
|----------|------|------|-----|------|----|----|----|-------|------|-------|-------|------------|
| code     | IC50 | conc | log | %inh | T2 | T1 | ΔT | RFU2  | RFU1 | ΔRFU  | slope | K.Activity |
| Acarbose |      | 100  | 2   | 96.5 | 30 | 0  | 30 | 3.45  | 0    | 3.45  | 3.333 | 4.14       |
|          |      | 10   | 1   | 90.2 | 30 | 0  | 30 | 9.81  | 0    | 9.81  | 3.333 | 11.772     |
|          |      | 1    | 0   | 84.3 | 30 | 0  | 30 | 15.73 | 0    | 15.73 | 3.333 | 18.876     |
|          |      | 0.1  | -1  | 75.4 | 30 | 0  | 30 | 24.63 | 0    | 24.63 | 3.333 | 29.556     |
|          |      | 0.01 | -2  | 47.5 | 30 | 0  | 30 | 52.46 | 0    | 52.46 | 3.333 | 62.952     |
| EC       |      |      |     | 0    | 30 | 0  | 30 | 100   | 0    | 100   | 3.333 | 120        |

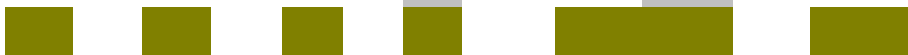



## Lab Report I

| ser | compound |   |     | $\alpha$ -glucosidase<br>IC50 | DF=100      |
|-----|----------|---|-----|-------------------------------|-------------|
|     | code     |   | M.W | mg/ml                         | SD<br>$\pm$ |
| 1   | F4       | 2 | --- | 0.548                         | 0.02        |
| 2   | F20      | 9 | --- | 2.435                         | 0.09        |
| *** | Acarbose |   | --- | 0.604                         | 0.02        |

**Detailed results.**

**α- Glucosidase**

| code                                                                              | IC50 | conc | log | %inh | T2 | T1 | ΔT | RFU2  | RFU1 | ΔRFU  | slope | K.Activity |
|-----------------------------------------------------------------------------------|------|------|-----|------|----|----|----|-------|------|-------|-------|------------|
| F4                                                                                |      | 10   | 1   | 90.7 | 30 | 0  | 30 | 9.33  | 0    | 9.33  | 3.333 | 11.196     |
| 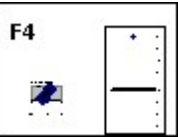 |      | 5    | 0.7 | 76.4 | 30 | 0  | 30 | 23.62 | 0    | 23.62 | 3.333 | 28.344     |
|                                                                                   |      | 1    | 0   | 53.4 | 30 | 0  | 30 | 46.55 | 0    | 46.55 | 3.333 | 55.86      |
|                                                                                   |      | 0.1  | -1  | 20.6 | 30 | 0  | 30 | 79.35 | 0    | 79.35 | 3.333 | 95.22      |
|                                                                                   |      | 0.01 | -2  | 8.98 | 30 | 0  | 30 | 91.02 | 0    | 91.02 | 3.333 | 109.22     |
|                                                                                   | EC   |      |     |      | 0  | 30 | 0  | 30    | 100  | 0     | 100   | 3.333      |

| code                                                                              | IC50 | conc | log | %inh | T2 | T1 | ΔT | RFU2  | RFU1 | ΔRFU  | slope | K.Activity |
|-----------------------------------------------------------------------------------|------|------|-----|------|----|----|----|-------|------|-------|-------|------------|
| F20                                                                               |      | 10   | 1   | 83.8 | 30 | 0  | 30 | 16.23 | 0    | 16.23 | 3.333 | 19.476     |
| 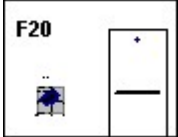 |      | 5    | 0.7 | 54.2 | 30 | 0  | 30 | 45.77 | 0    | 45.77 | 3.333 | 54.924     |
|                                                                                   |      | 1    | 0   | 20.6 | 30 | 0  | 30 | 79.38 | 0    | 79.38 | 3.333 | 95.256     |
|                                                                                   |      | 0.1  | -1  | 8.85 | 30 | 0  | 30 | 91.15 | 0    | 91.15 | 3.333 | 109.38     |
|                                                                                   |      | 0.01 | -2  | 3.45 | 30 | 0  | 30 | 96.55 | 0    | 96.55 | 3.333 | 115.86     |
|                                                                                   | EC   |      |     |      | 0  | 30 | 0  | 30    | 100  | 0     | 100   | 3.333      |

| code                                                                                | IC50 | conc | log | %inh | T2 | T1 | ΔT | RFU2  | RFU1 | ΔRFU  | slope | K.Activity |
|-------------------------------------------------------------------------------------|------|------|-----|------|----|----|----|-------|------|-------|-------|------------|
| Acarbose                                                                            |      | 10   | 1   | 90.1 | 30 | 0  | 30 | 9.86  | 0    | 9.86  | 3.333 | 11.832     |
| 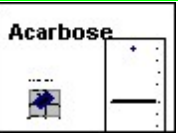 |      | 5    | 0.7 | 82.6 | 30 | 0  | 30 | 17.44 | 0    | 17.44 | 3.333 | 20.928     |
|                                                                                     |      | 1    | 0   | 51.4 | 30 | 0  | 30 | 48.63 | 0    | 48.63 | 3.333 | 58.356     |
|                                                                                     |      | 0.1  | -1  | 13.8 | 30 | 0  | 30 | 86.22 | 0    | 86.22 | 3.333 | 103.46     |
|                                                                                     |      | 0.01 | -2  | 5.95 | 30 | 0  | 30 | 94.05 | 0    | 94.05 | 3.333 | 112.86     |
|                                                                                     | EC   |      |     |      | 0  | 30 | 0  | 30    | 100  | 0     | 100   | 3.333      |

# Lab Report

| ser | sample               |                   |      | PPAR $\gamma$ | FLD   |
|-----|----------------------|-------------------|------|---------------|-------|
|     | Original code number | Manuscript number | Type | ug/ml         |       |
| 1   | F4                   | 2                 |      | 3.152±0.03    | 1.365 |
| 2   | F20                  | --9-              |      | 3.706±0.32    | 1.605 |
| 3   | pioglitazone         | ---               |      | 4.884±0.29    | 2.115 |
| 4   | control              | ---               |      | 2.309±0.02    | 1     |

## Detailed Results:

Standard conc.

| ST   | Conc . |
|------|--------|
| St.1 | 10     |
| St.2 | 5      |
| St.3 | 2.5    |
| St.4 | 1.25   |
| St.5 | 0.625  |

Plate map

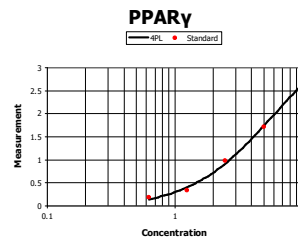



| <b>Calibrator</b> | <b>Wells</b> | <b>Conc.</b> | <b>Raw<br/>(Corrected)</b> | <b>Backfit</b> | <b>Recovery<br/>%</b> |
|-------------------|--------------|--------------|----------------------------|----------------|-----------------------|
| Standard1         | A1           | 10           | 2.64                       | 10.06          | 100.6                 |
| Standard2         | B1           | 5            | 1.71                       | 4.89           | 97.8                  |
| Standard3         | C1           | 2.5          | 0.984                      | 2.662          | 106.5                 |
| Standard4         | D1           | 1.25         | 0.33                       | 1.079          | 86.29                 |
| Standard5         | E1           | 0.625        | 0.177                      | 0.7074         | 113.2                 |

| <b>Sample</b> | <b>Wells</b> | <b>Raw</b> | <b>Background Corrected</b> | <b>Conc.</b> | <b>Conc. (Average)</b> | <b>%CV</b> | <b>SD</b> | <b>SEM</b> |
|---------------|--------------|------------|-----------------------------|--------------|------------------------|------------|-----------|------------|
| F4            | E2           | 1.17       | 1.17                        | 3.128        | 3.152                  | 1.07       | 0.0336    | 0.0238     |
|               | F2           | 1.18       |                             | 3.176        |                        |            |           |            |
| F20           | G2           | 1.44       | 1.35                        | 3.937        | 3.706                  | 8.84       | 0.328     | 0.232      |
|               | H2           | 1.29       |                             | 3.474        |                        |            |           |            |
| pioglitazone  | A3           | 1.77       | 1.71                        | 5.094        | 4.884                  | 6.08       | 0.297     | 0.21       |
|               | B3           | 1.66       |                             | 4.674        |                        |            |           |            |
| control       | C3           | 0.862      | 0.846                       | 2.328        | 2.309                  | 1.15       | 0.0265    | 0.0187     |
|               | D3           | 0.847      |                             | 2.291        |                        |            |           |            |
| Blank         | F1           | 0.015      | 0                           | 0.2304       | 0.2087                 | 9.36       | 0.0195    | 0.0113     |
|               | G1           | 0.004      |                             | 0.1926       |                        |            |           |            |
|               | H1           | 0.007      |                             | 0.2031       |                        |            |           |            |

# **Docking simulation figures**

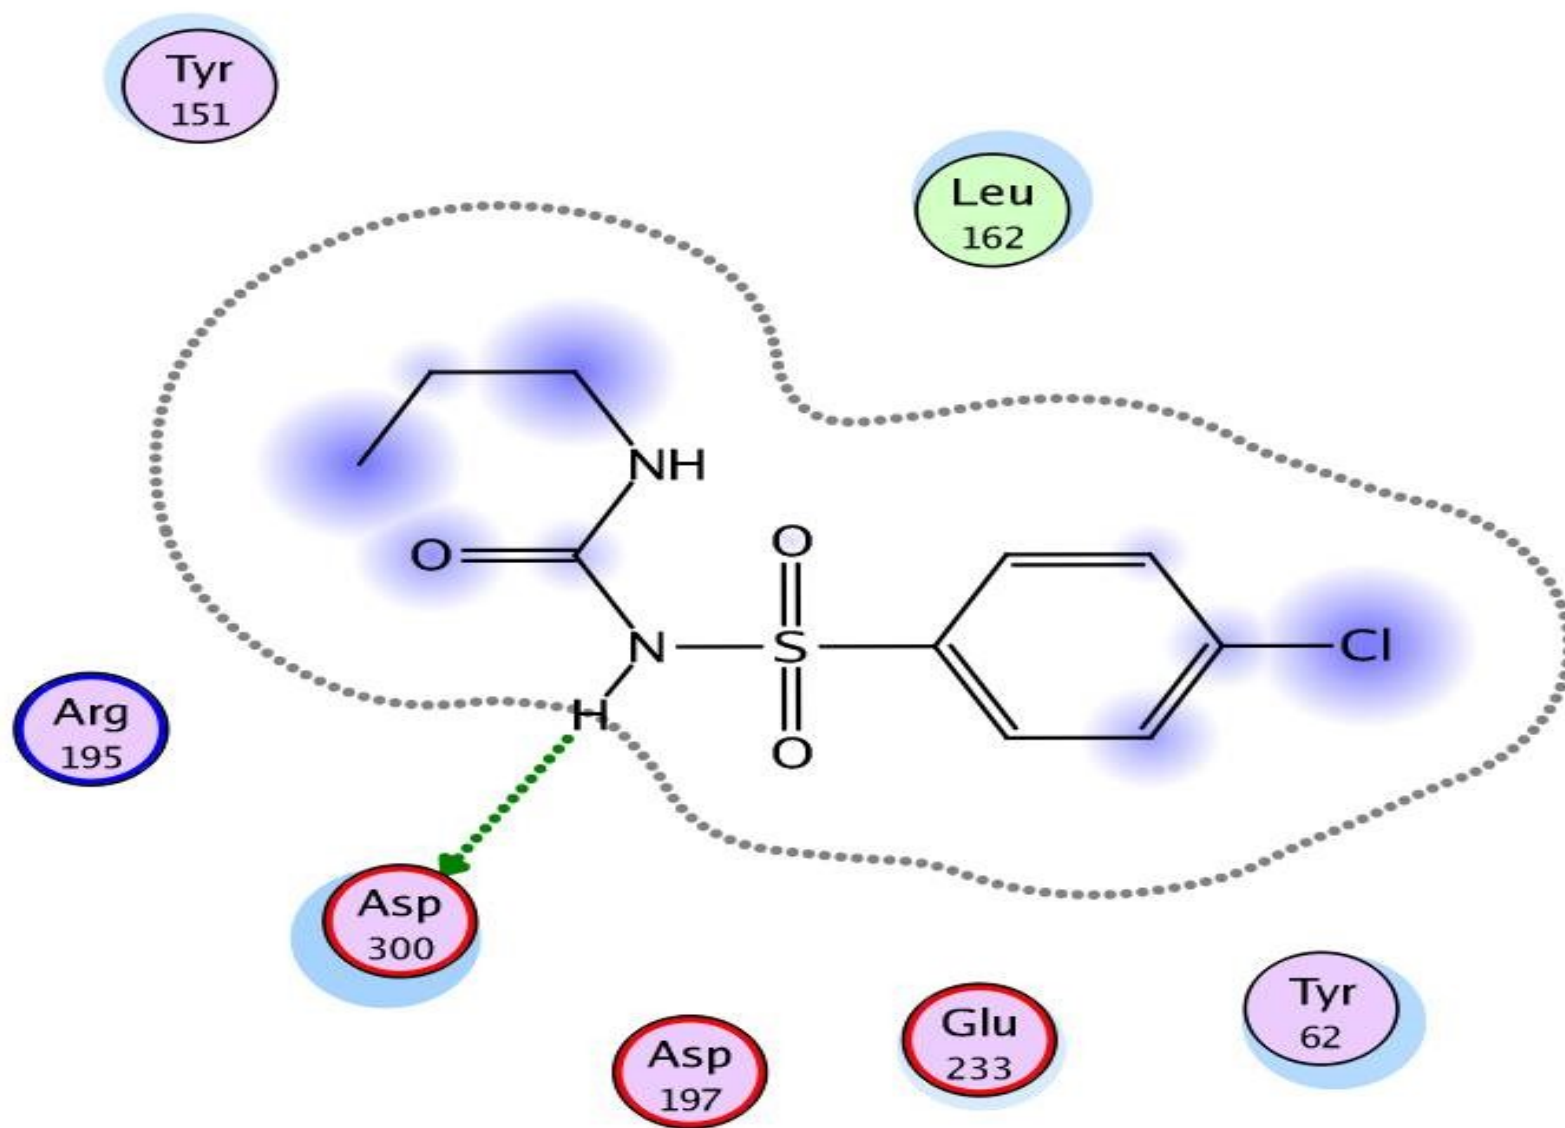

Figure S1: 2D interaction of **Chlorpropamide** inside the active site of  $\alpha$ -amylase (PDB: 2QV4)



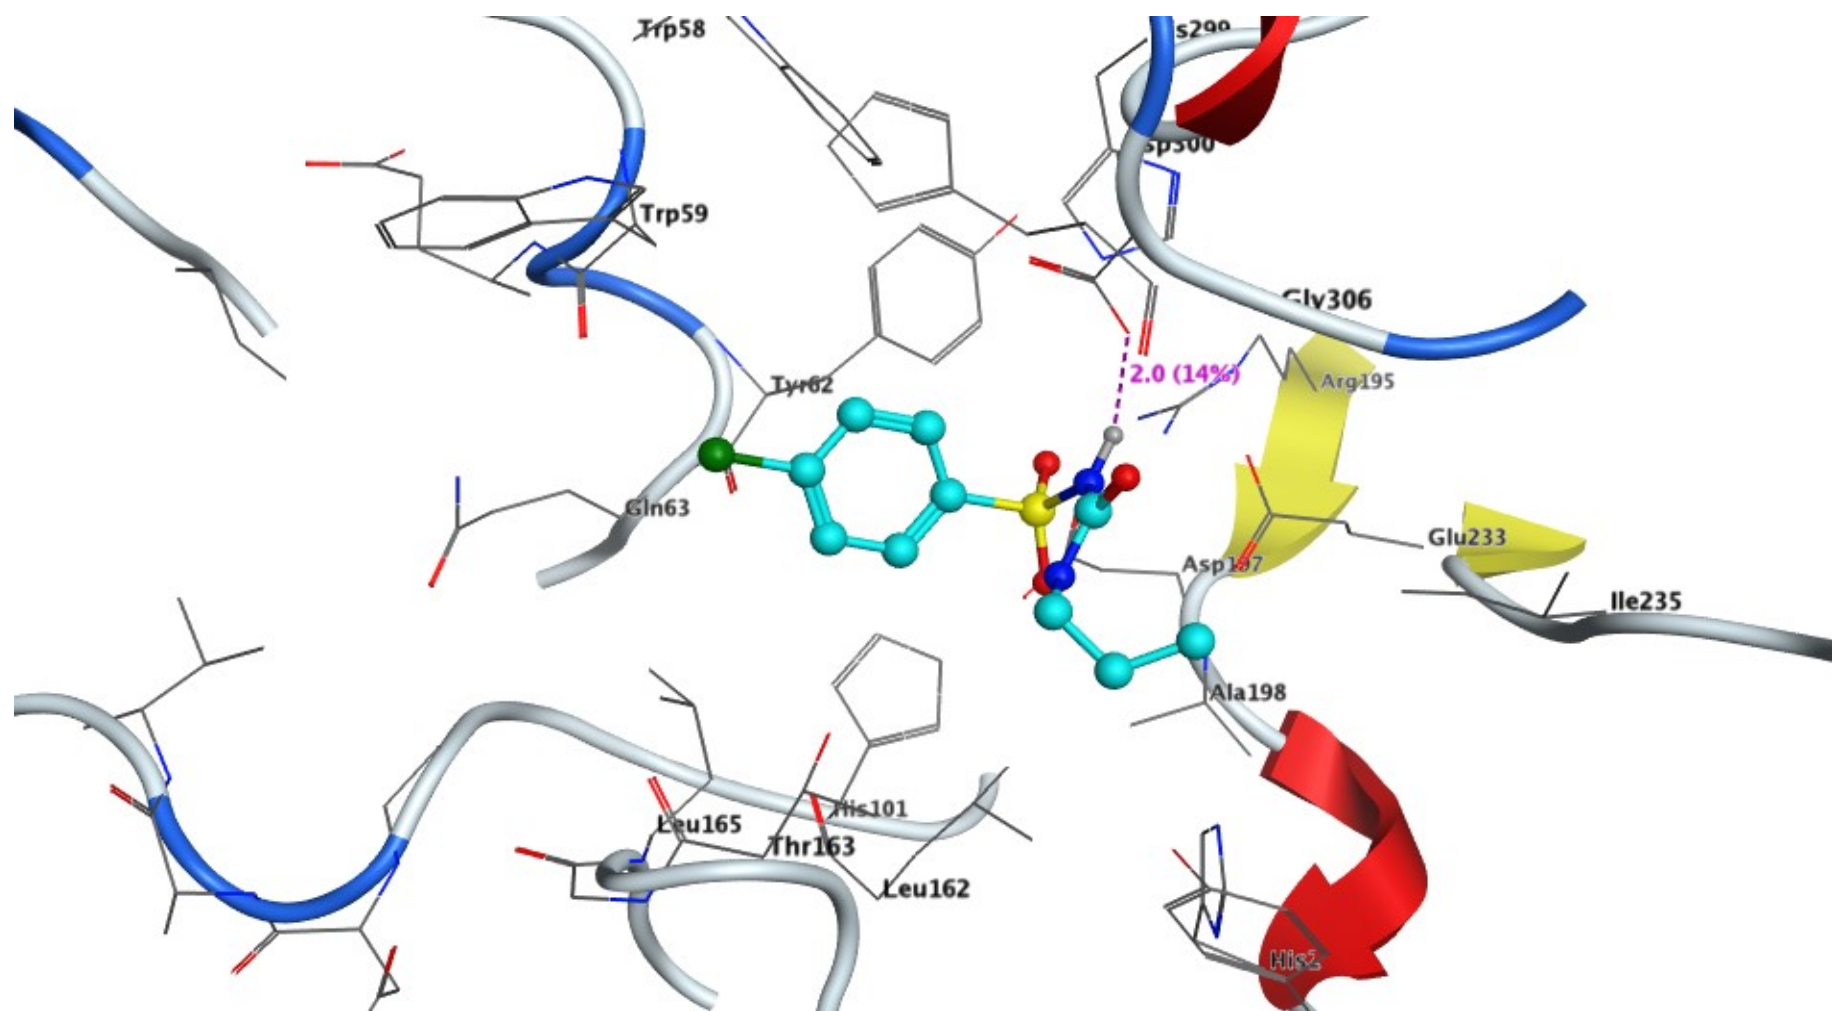

**Figure S2:** 3D interaction of **Chlorpropamide** inside the active site of  $\alpha$ -amylase (PDB: 2QV4)



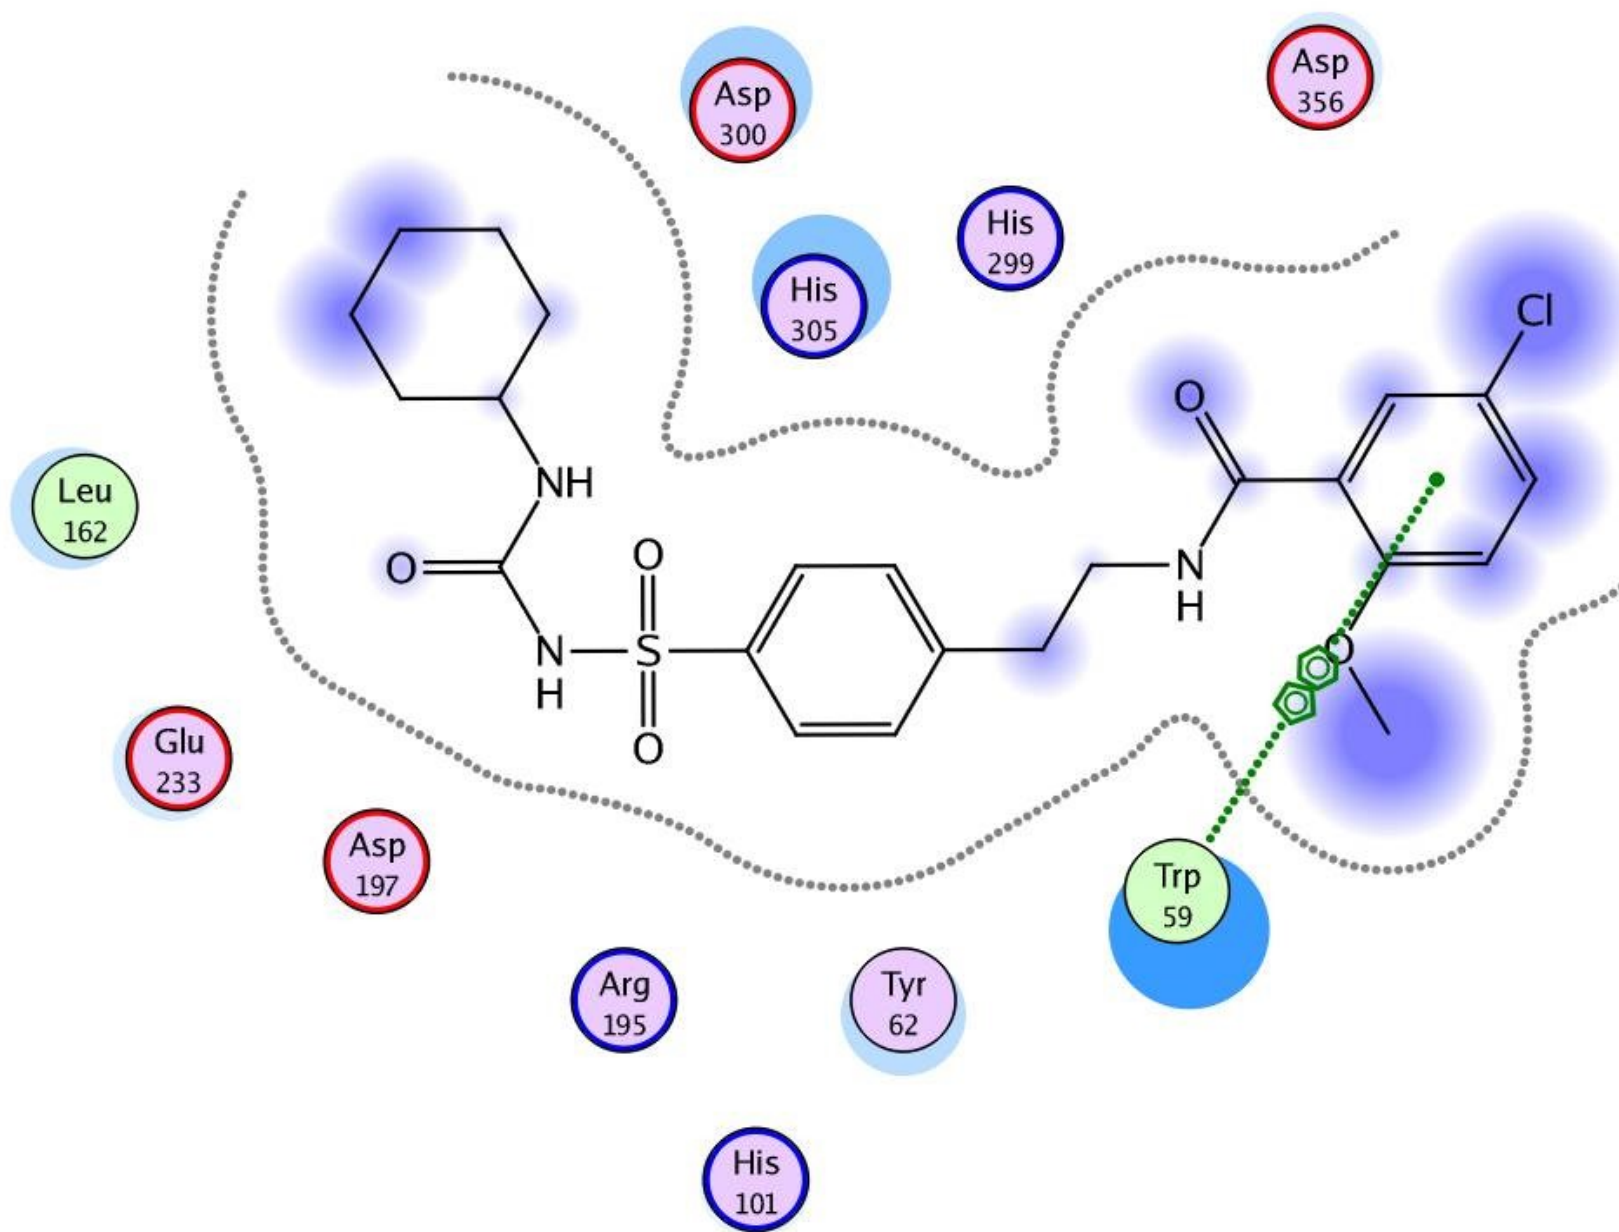

**Figure S3:** 2D interaction of **Glibenclamide** inside the active site of  $\alpha$ -amylase (PDB: 2QV4)

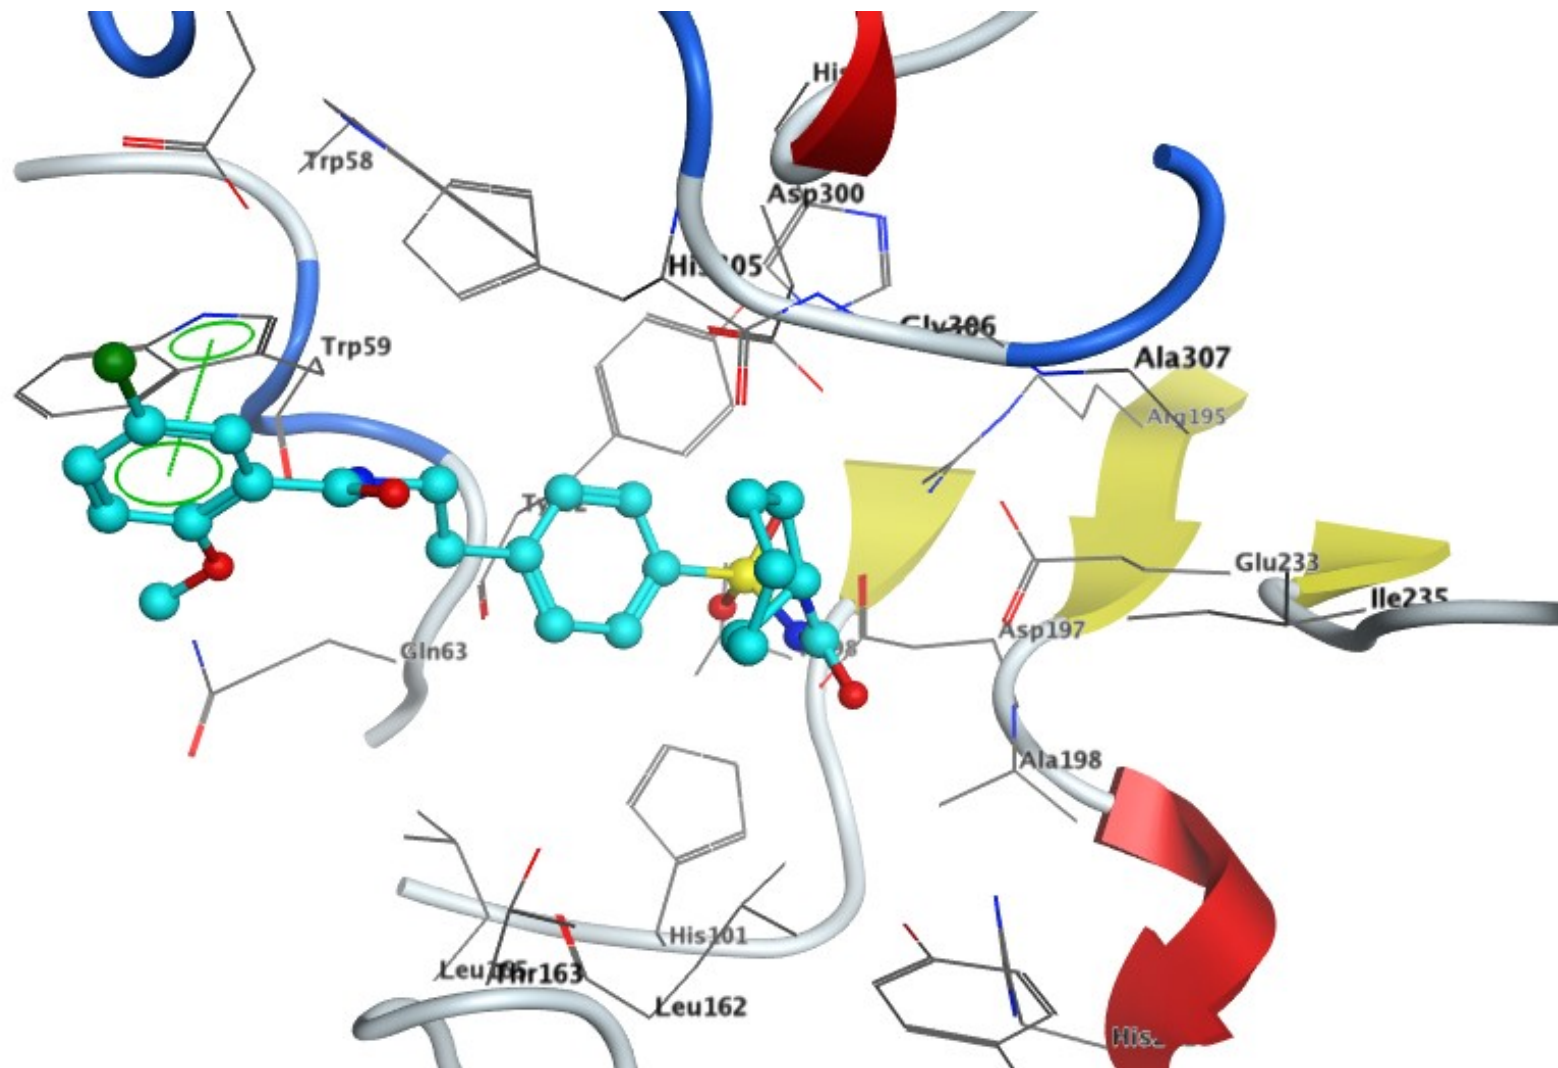

**Figure S4:** 3D interaction of **Glibenclamide** inside the active site of  $\alpha$ -amylase (PDB: 2QV4)

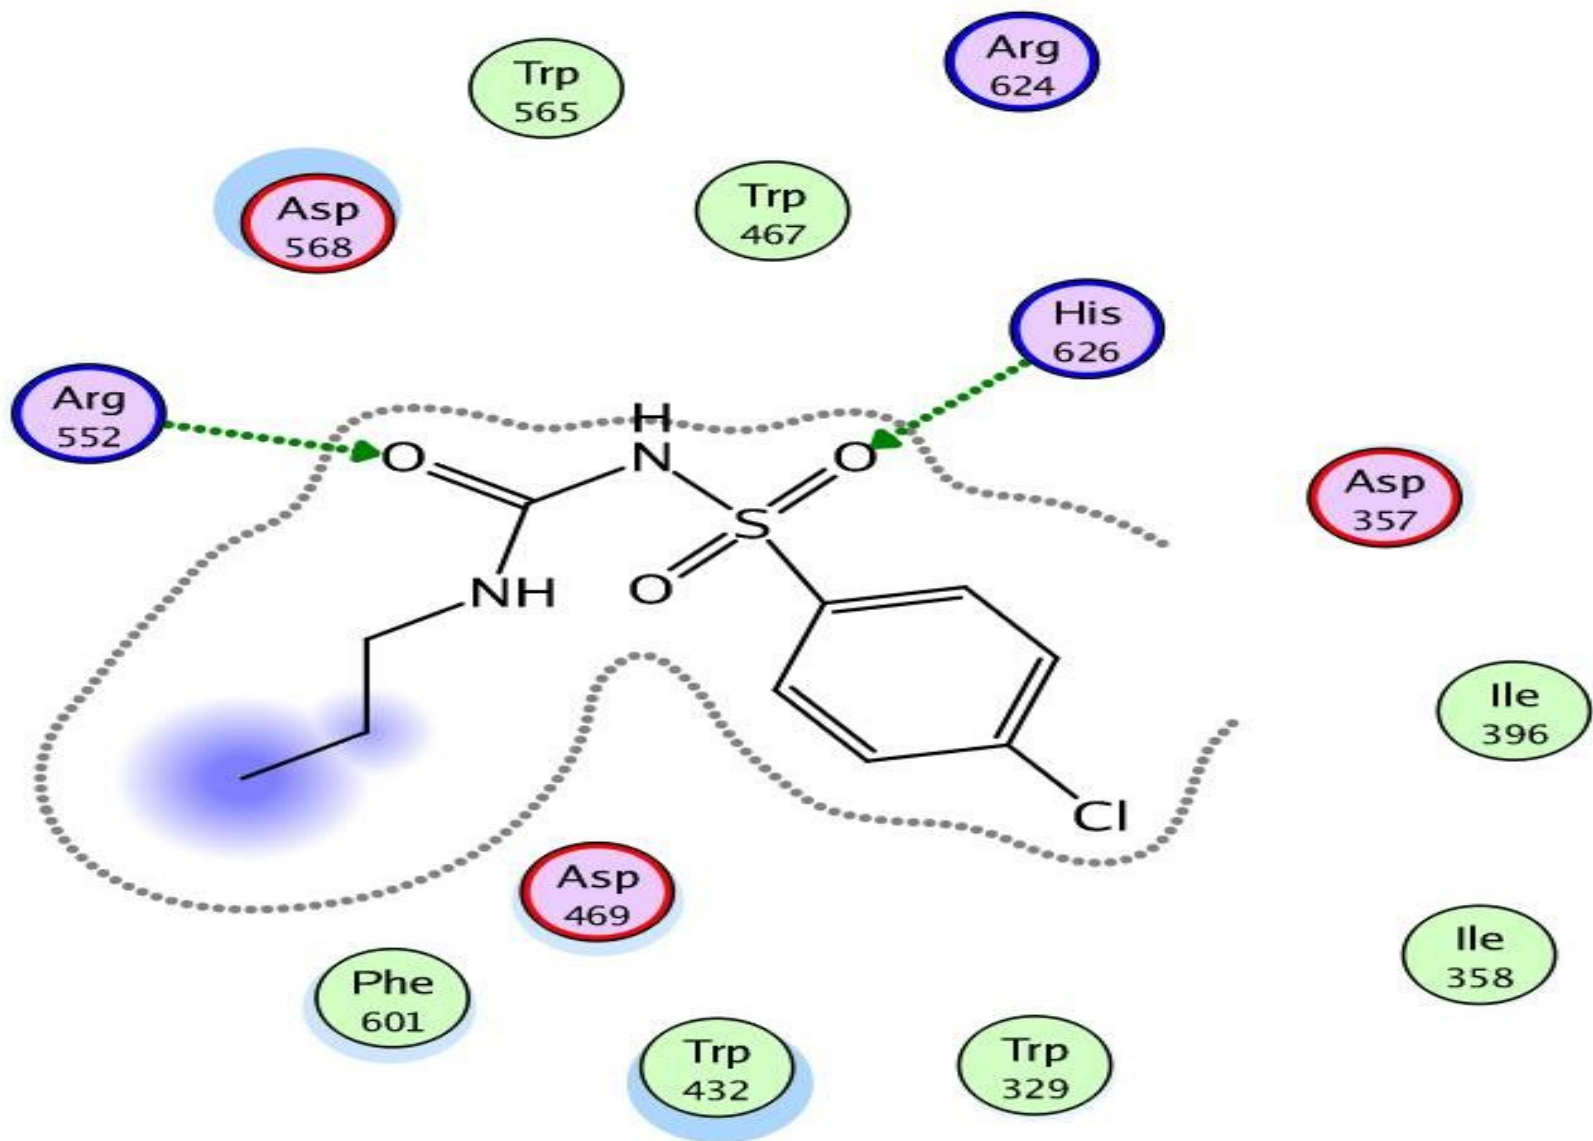

**Figure S5:** 2D interaction of **Chlorpropamide** inside the active site of  $\alpha$ -glucosidase (PDB: 3w37)



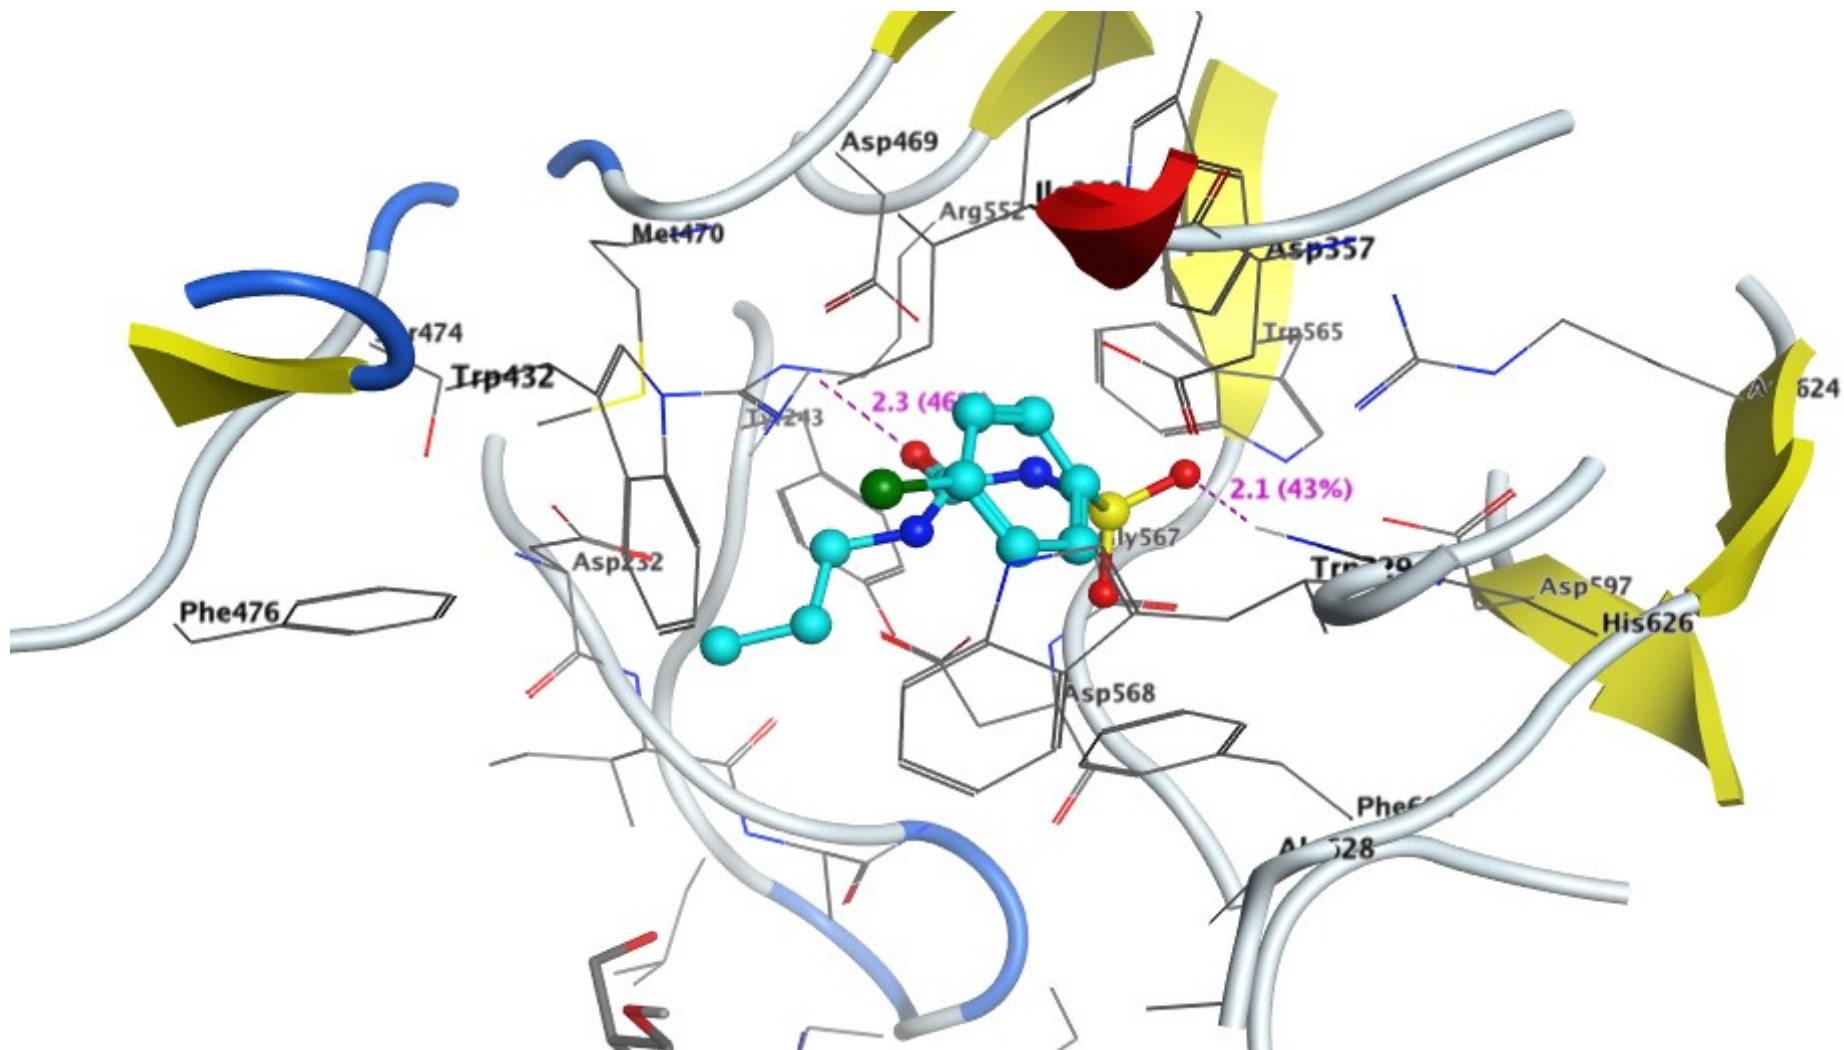

**Figure S6:** 3D interaction of **Chlorpropamide** inside the active site of  $\alpha$ -glucosidase (PDB: 3w37)

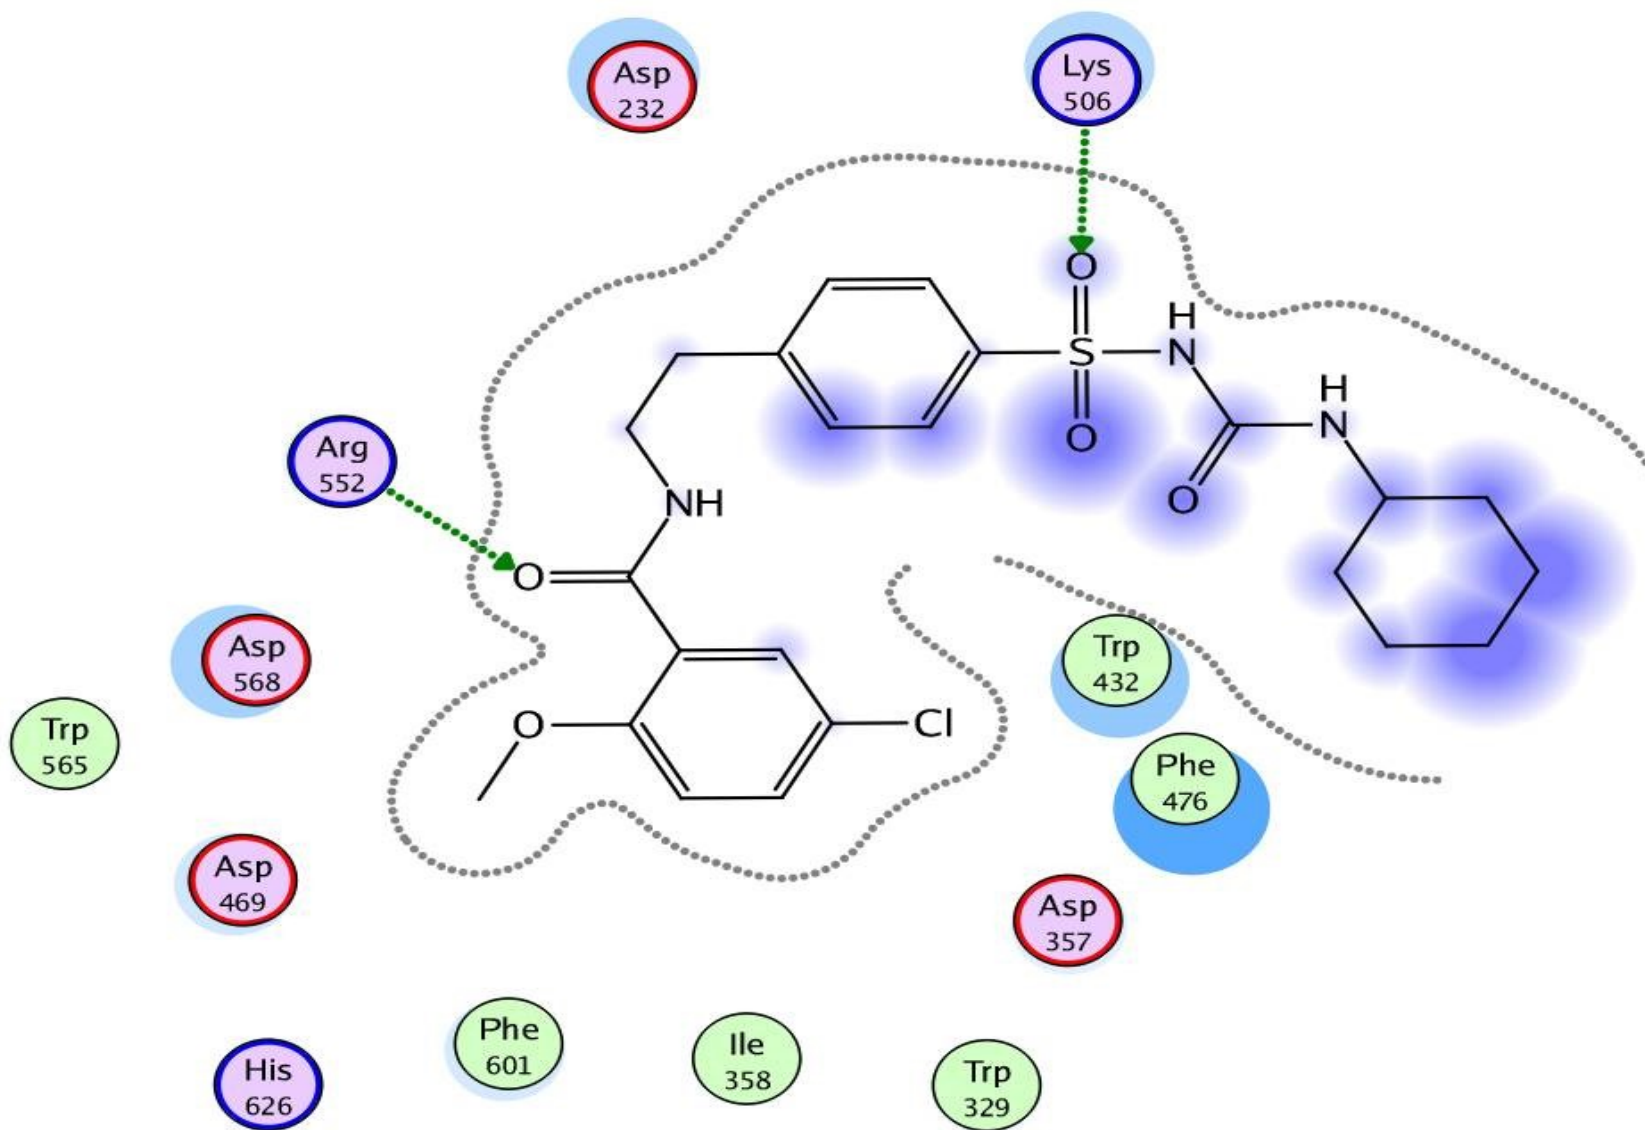

**Figure S7:** 2D interaction of **Glibenclamide** inside the active site of  $\alpha$ -glucosidase (PDB: 3w37)

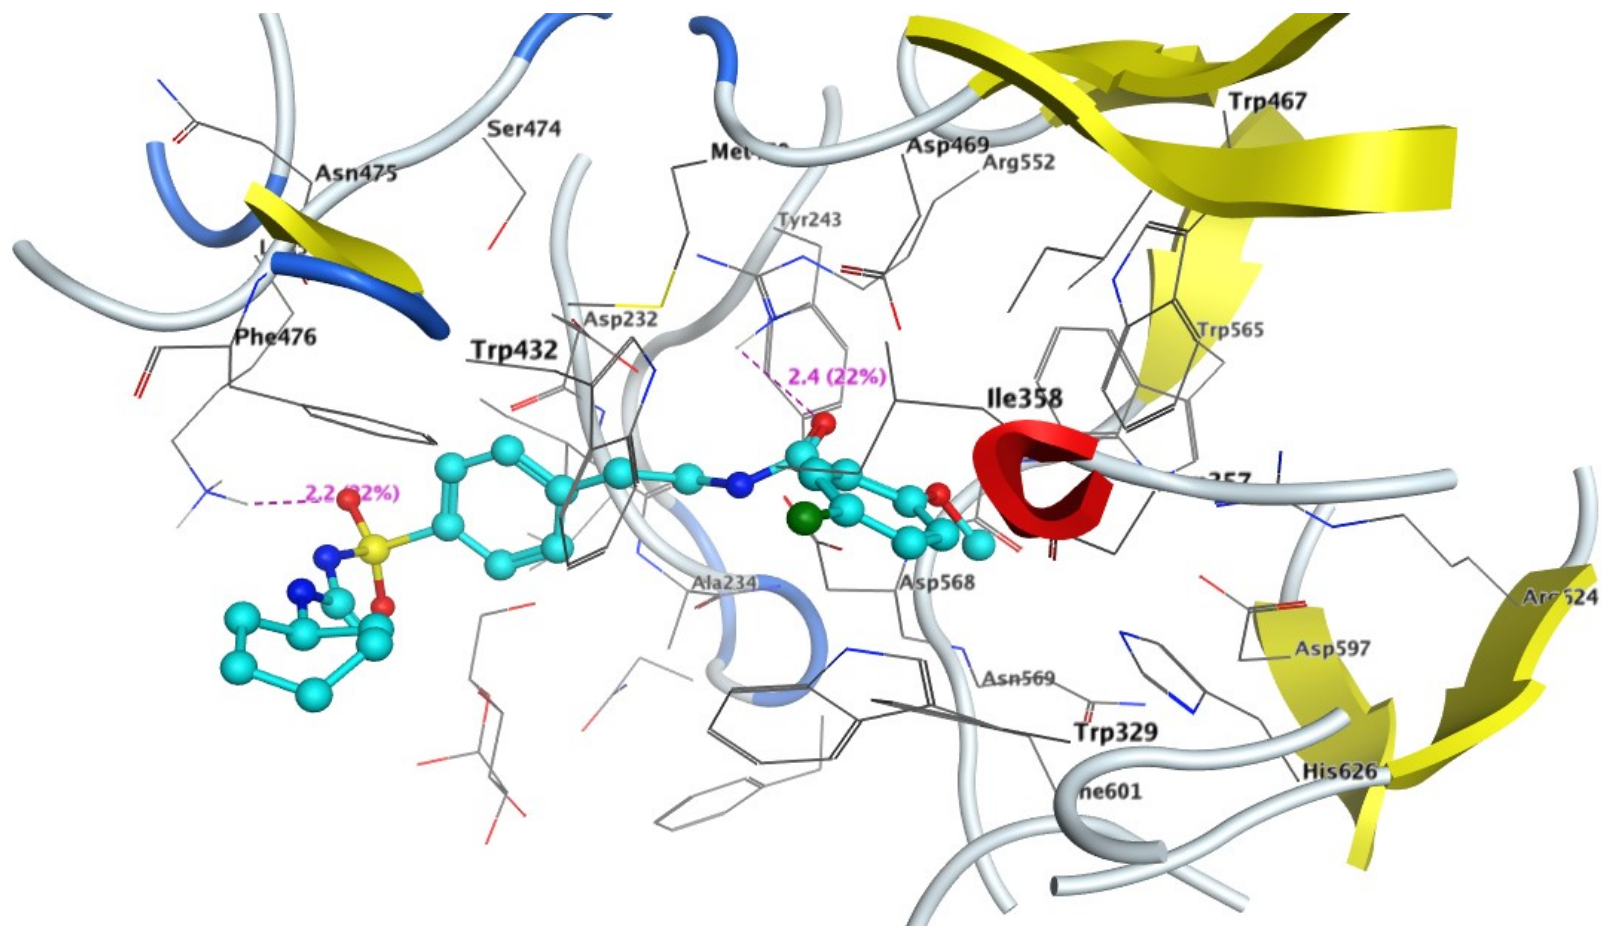

**Figure S8:** 3D interaction of **Glibenclamide** inside the active site of  $\alpha$ -glucosidase (PDB: 3w37)



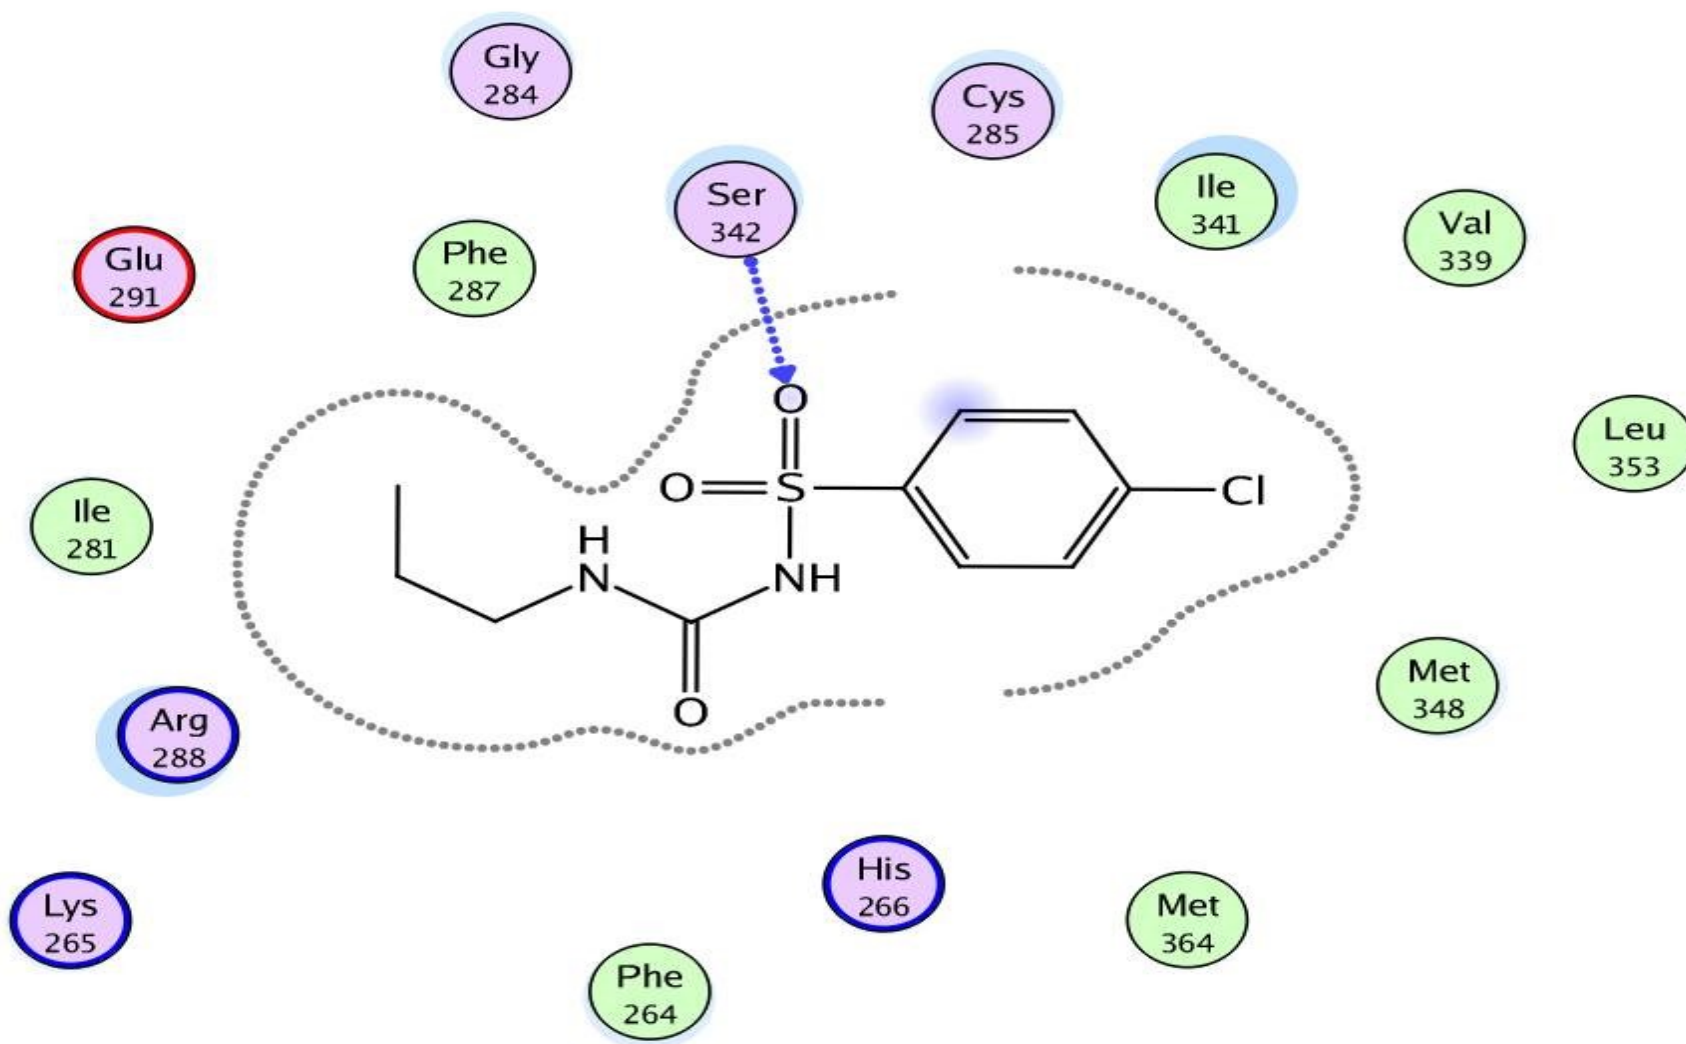

**Figure S9:** 2D interaction of **Chlorpropamide** inside the active site of PPAR- $\gamma$  (PDB: 3SZ1)

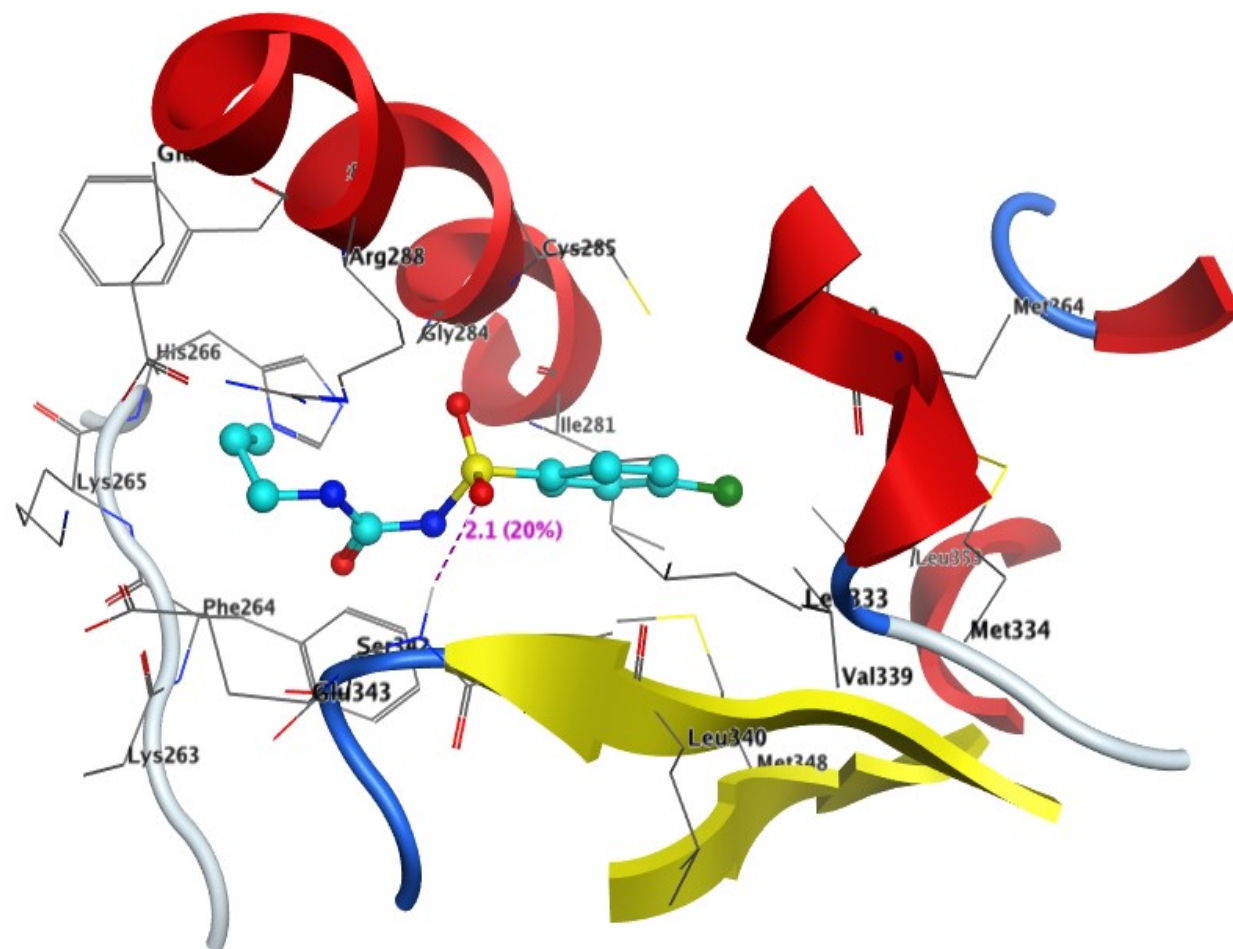

**Figure S10:** 3D interaction of **Chlorpropamide** inside the active site of PPAR-γ (PDB: 3SZ1)

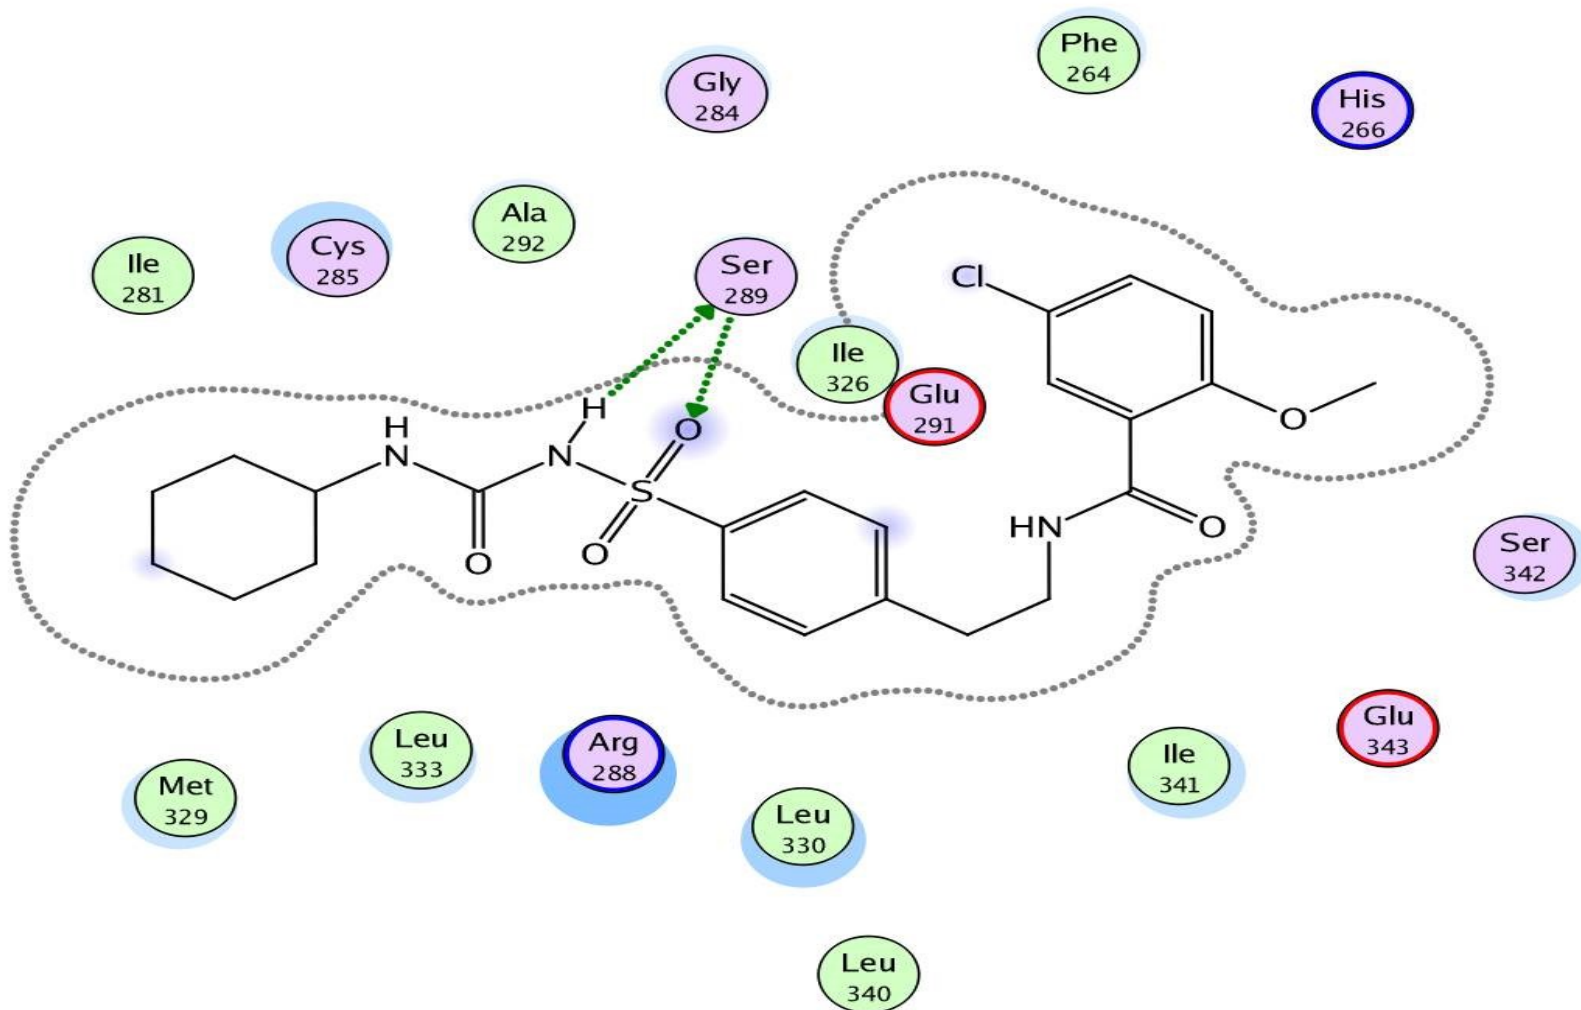

**Figure S11:** 2D interaction of **Glibenclamide** inside the active site of PPAR-γ (PDB: 3SZ1)

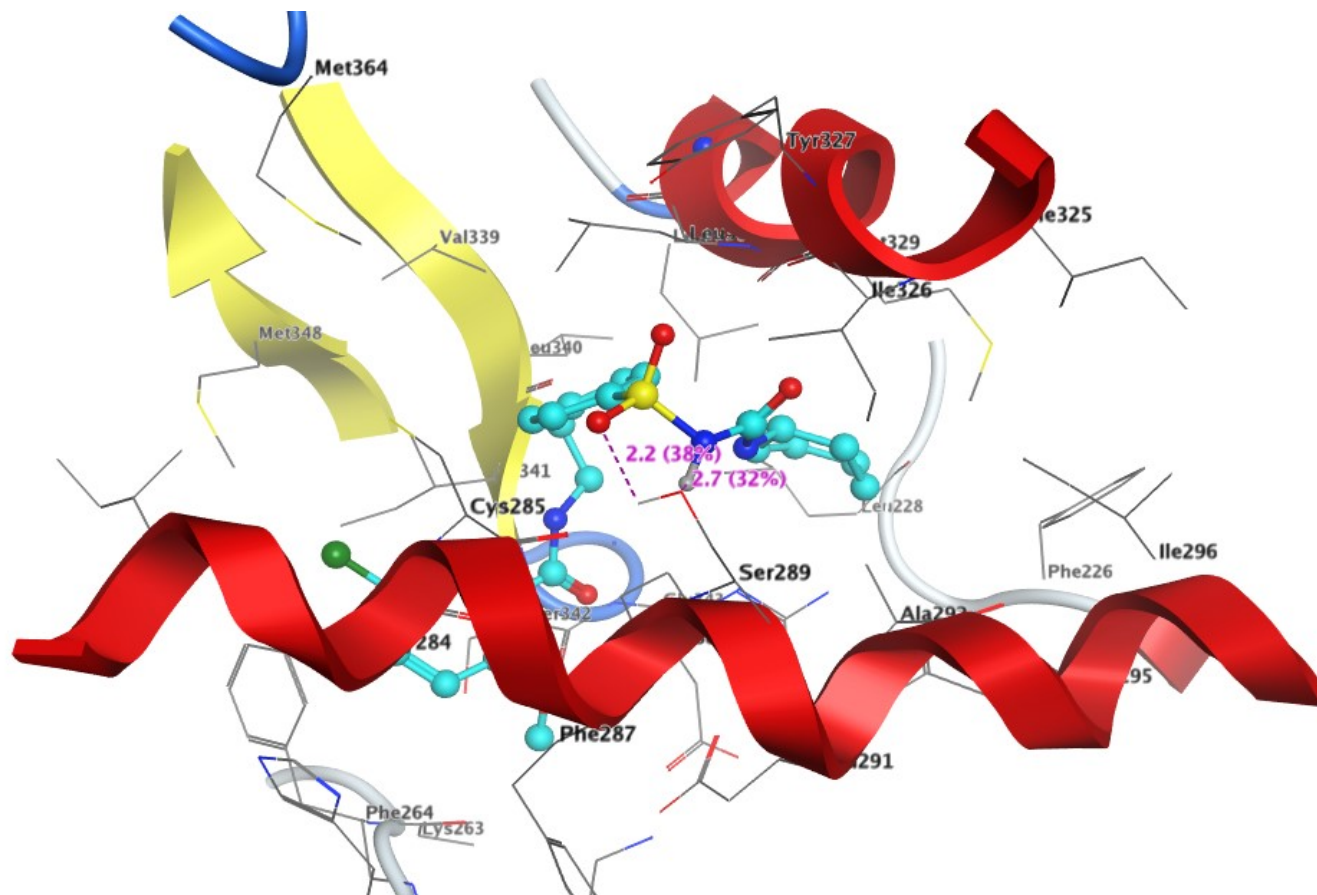

**Figure S12:** 3D interaction of **Glibenclamide** inside the active site of PPAR-γ (PDB: 3SZ1)
